# Supplementary material for: Bioinformatics Analysis Explores Potential Hub Genes in Nonalcoholic Fatty Liver Disease
Source: Front Genet. 2021 Oct 29;12:772487. doi: 10.3389/fgene.2021.772487 (PMC8586215; doi:10.3389/fgene.2021.772487)
Supplement: Supplementary file 2 [file Table7.CSV]

Table S7 GS value in different clinical features
symbol	GS.Age	GS.Gender	GS.Body.mass.index	GS.ALT	GS.AST	GS.Ballooning	GS.Lobular.inflammation	GS.Fibrosis	GS.Nafld.activity.score	GS.Steatosis
EEF1A1	0.174637769	0.126573216	0.027708922	0.009271783	-0.11514562	-0.162514475	-0.116536249	-0.232131472	-0.089286367	0.033921112
SLC35E2	-0.017732326	-0.001288481	0.038880799	0.064430965	0.033371786	0.082405483	-0.116250337	0.059444031	0.0367899	0.065942856
RPS28	0.093350153	-0.170610633	-0.189283173	-0.088475678	-0.128722681	-0.222012159	-0.27781801	-0.115042214	-0.144841332	0.095150084
IPO13	-0.031277309	0.167375693	0.16611811	0.13797814	0.044415484	0.035189441	0.020840177	-0.035019367	0.045544203	0.034609696
AFAP1	0.010040457	0.006870861	-0.0386939	0.035044438	0.038555665	-0.109000941	-0.099518006	-0.060016938	-0.03480989	0.165911452
GGTLC1	0.012766342	0.184691496	0.057988658	-0.109787583	-0.127116029	-0.037742291	0.091432917	-0.052002809	0.023304851	-0.001594589
CDT1	0.075299771	0.037245953	0.57572123	0.569368255	0.445953766	0.399154605	0.352054069	0.234522831	0.441699458	0.263711094
TRPV1	0.094749358	0.201368938	0.146617141	0.13181503	0.015291311	0.192657681	0.350723714	0.109468609	0.362139011	0.270755407
LPP	-0.051850016	-0.073756244	-0.073138809	-0.346695231	-0.271452784	-0.199854586	-0.047587258	-0.070569475	-0.218986273	-0.216774311
CCNE2	0.092820843	0.001917223	0.082263588	0.370882883	0.354561493	0.199679292	-0.013196296	0.185569856	0.06008836	-0.029413895
HNRNPAB	-0.150085757	0.254195879	-0.251966341	-0.193700093	-0.181301705	-0.148937606	-0.045233228	-0.179609376	-0.253141984	-0.291925843
LOH12CR1	0.149799838	0.003116689	-0.036055478	0.089315462	-0.010631727	0.155926147	0.280361818	0.063547123	0.173005515	0.009612952
SNIP1	0.014331853	-0.191310116	-0.438209953	-0.372970215	-0.133968912	-0.265029993	-0.441137677	-0.078149685	-0.533920053	-0.505737888
COL17A1	0.05836889	0.169747302	0.282092492	0.00115291	-0.078185343	-0.16006341	-0.141638624	-0.146004433	-0.010227496	0.261518042
BCL6B	0.01112994	-0.143452478	-0.303146553	-0.124040356	-0.005740668	-0.148538248	-0.373077879	-0.026763135	-0.432636884	-0.462641465
GRHL1	-0.160149863	0.413556344	-0.373013557	-0.313265134	-0.43148665	-0.424434641	-0.148975969	-0.44403194	-0.317302226	-0.158131041
LOC644613	-0.306527332	0.249251906	-0.078598601	-0.077319335	-0.11986521	-0.072878689	0.003691722	-0.101963706	-0.045496641	-0.085154859
ATP13A4	0.12800316	0.121300082	0.19160788	0.027252118	-0.081105323	0.003973376	0.147578363	-0.081114347	0.167691551	0.19651257
DIAPH2	0.051498917	-0.285152136	0.260251103	0.143765772	0.121074343	0.200625339	0.349740212	0.162096366	0.346748918	0.252385302
HMG20B	0.065259267	-0.018041099	-0.036524295	0.111142309	0.022716347	-0.092330887	-0.20374153	-0.111025116	-0.100567012	-0.006117369
CD69	0.054187462	-0.317392154	-0.294120582	-0.183736244	-0.02050143	-0.020621628	-0.046978821	0.065486532	-0.149475192	-0.223405832
KCNG4	-0.122458267	0.069698438	0.104932008	-0.208470346	-0.069725286	-0.02232879	-0.036811331	0.026404355	-0.034388187	-0.037177671
MLYCD	0.038949035	-0.061153783	0.340261641	0.202114599	0.070788971	0.17663599	0.147746288	0.031219604	0.306574755	0.394413923
UHRF1BP1L	0.066798432	-0.005361936	0.320136747	0.255205649	0.318851386	0.273290986	0.013832742	0.263491106	0.200109463	0.102991274
ITGA11	0.137988371	-0.132680667	0.12485886	-0.079693884	-0.016735862	-0.085434513	-0.156861099	0.028628184	-0.04087388	0.127834192
TICAM2	0.062461124	-0.242796637	0.249781708	0.191671231	0.204017663	0.100148413	-0.138454354	0.133596542	0.102493815	0.180851819
SERTAD2	0.036286135	-0.132590689	0.308677811	0.156401735	0.030990904	0.1388307	0.123453455	0.13395881	0.272480385	0.286504563
SPP1	0.283322477	-0.118322029	0.416005223	0.397368589	0.41891422	0.437967868	0.406445693	0.3948673	0.456983349	0.302714541
HBE1	-0.002038224	-0.165597152	0.035168913	-0.059036333	-0.125310343	0.056061022	0.209085851	-0.026403341	0.153605707	0.192614791
PCBD2	0.047541398	0.03660384	0.159267292	-0.075101737	-0.147775209	-0.019279232	0.085593686	-0.021029734	0.118572211	0.150981449
ZBED2	-0.181126777	-0.092076059	-0.015353252	-0.217313365	-0.204292217	-0.198152213	-0.162388195	-0.129378446	-0.072822927	0.150081304
USP21	0.121222401	0.101081436	0.301515477	0.250220054	0.109611705	0.204540973	0.179650333	0.101124565	0.279866265	0.17875737
RHD	-0.185287331	0.036718383	-0.160662341	-0.227729444	-0.157488161	-0.126327491	-0.061912866	-0.089538739	-0.21853166	-0.270258912
AUP1	-0.084705441	-0.0102788	-0.158231244	-0.19797262	-0.262169475	-0.410662505	-0.444801745	-0.380813027	-0.39243654	-0.090024717
MFN2	-0.325090907	0.004358369	0.018239255	0.104225761	0.150632096	0.01273697	-0.162353338	-0.031345094	-0.16894644	-0.219605756
BRD9	-0.090164482	0.052697058	0.049644866	0.003163269	-0.133125795	-0.279271985	-0.189383763	-0.242707795	-0.169498696	0.034844469
DERL3	0.301576682	-0.267692552	0.37945554	0.329760534	0.275490164	0.323802502	0.297804683	0.198847341	0.453903254	0.435374588
SYTL2	-0.02625433	-0.178077011	0.079503389	-0.011880707	-0.002884306	0.07802902	0.18623746	0.117002837	0.2083091	0.205736008
SELM	-0.033301989	0.091416289	-0.178936837	-0.20878364	-0.261002035	-0.354371862	-0.356820762	-0.304409106	-0.414240828	-0.256145151
CTRB2	0.055192363	0.12993625	0.136383761	0.100507946	-0.021578218	-0.037531876	-0.052998985	-0.103964194	0.045755811	0.085065881
DCK	0.055052977	-0.251509629	0.333874522	0.341627243	0.465402182	0.378746381	0.128407699	0.38233271	0.291938329	0.17178277
FOXI1	-0.033199439	0.071684449	0.028737925	-0.057090637	0.01262613	0.063679046	0.163800133	0.070400885	0.132099789	0.08431939
ZFPM1	-0.06185222	0.074147289	0.245638337	0.373653875	0.245674356	0.173600922	0.078351334	0.060524688	0.167464927	0.108769952
UTY	0.038049746	0.404192198	0.188000341	0.06971377	-0.130860383	-0.207813502	-0.054920134	-0.24931133	0.021869995	0.257285679
GPR32	-0.02476514	0.025345116	-0.0295038	-0.099984753	-0.001909856	-0.013777417	0.002798822	0.033803578	-0.032605379	-0.059607473
KDM2B	-0.016978641	0.220330587	0.009827344	0.074205069	-0.051847394	-0.116826818	-0.229836879	-0.13357322	-0.081432681	0.080572451
CYP26A1	0.155554454	0.036119287	-0.066037125	0.143183392	0.149794123	0.195592482	-0.004283779	0.182600407	0.137504921	0.068678806
WNT2B	-0.017856143	-0.112334612	0.284580358	0.178880141	0.245338641	0.334881316	0.321518949	0.306545182	0.424195914	0.35174935
HIST1H2BD	-0.19323098	-0.134339724	0.526264031	0.526337036	0.429053872	0.418359435	0.43626599	0.231383328	0.605022403	0.56347511
GADD45G	-0.089581037	0.097022145	-0.496873265	-0.520706951	-0.383550064	-0.435098855	-0.366281043	-0.321246616	-0.654169037	-0.609705033
ERGIC1	-0.027678009	0.056274314	-0.134396334	-0.342999823	-0.395365202	-0.327483562	-0.183926226	-0.27118255	-0.190525484	0.002116328
ABCD4	0.129450883	0.11940096	0.302921126	-0.040487186	-0.116805167	-0.078265473	0.047692289	-0.09387376	0.082225081	0.147659221
FAM193A	-0.104904478	-0.090307412	-0.186291163	-0.182278956	-0.071935363	-0.241308789	-0.359964505	-0.077032633	-0.334264323	-0.252108917
NCOA6IP	-0.116354114	0.074387983	-0.286707588	-0.121807084	-0.153007222	-0.235812111	-0.295198194	-0.23920791	-0.328224865	-0.245967665
SKIV2L2	0.055922811	-0.100458142	-0.236904783	-0.242242051	-0.155526711	-0.252041742	-0.348517547	-0.20312907	-0.317191912	-0.194361199
GEFT	0.052460765	-0.071184813	0.106437769	-0.069401095	-0.039561784	0.023500738	0.116936296	-0.005269922	0.15650185	0.257510207
NUMBL	0.09815791	-0.162215725	-0.017887561	0.018522349	-0.004191743	-0.094053584	-0.229789489	-0.032650713	-0.053446153	0.133536379
HDAC8	0.004354053	-0.163188738	0.232483811	0.340839901	0.2565991	0.295025949	0.159248302	0.208375776	0.289965869	0.221886665
SEMA3E	0.270291366	-0.174225492	0.226642885	0.124816297	0.182760059	0.226546263	0.168725257	0.289162534	0.176615344	-0.007261424
RGS5	-0.324566499	0.289354932	-0.069375561	-0.250842446	-0.305796113	-0.503339299	-0.327680489	-0.46402639	-0.400124265	-0.117911682
KDELC2	0.03680401	-0.209156104	-0.37164768	-0.32121891	-0.104852471	-0.205938655	-0.337492213	-0.055648249	-0.466034814	-0.46998435
WHSC1	0.108844409	0.213768803	-0.072434396	-0.005404858	-0.190180776	-0.265839692	-0.1396364	-0.286410219	-0.136090345	0.014383978
MUC13	0.121415862	-0.130654149	0.118058461	-0.005277017	0.112165825	0.216824691	-0.022523581	0.288787512	0.115099656	0.100228477
AQP3	0.157050575	-0.040351536	-0.185682364	0.070467052	0.116010037	-0.027126449	-0.23466389	-0.040469331	-0.187220211	-0.204726787
FBXO44	0.170762496	0.208822843	0.118408982	0.097675698	-0.057017912	0.04400537	0.023494135	0.041862574	0.118594702	0.126658741
ENTPD2	-0.06545169	0.289376364	0.003518584	0.092215177	-0.118920971	-0.258164391	-0.23694248	-0.305347451	-0.109832314	0.119444076
MARK4	-0.027500593	-0.055381698	-0.036201027	0.14002525	0.061277132	-0.092831244	-0.11075057	-0.09270851	0.005398013	0.185512223
SPRED3	-0.077005801	0.222425116	0.072491396	-0.006413739	-0.007583842	0.045662933	0.074373774	-0.059406787	0.102904975	0.028049938
CTNNB1	0.121162065	-0.311568162	0.044140001	0.093163658	0.191301205	0.086564231	-0.167163047	0.177533893	-0.046518278	-0.061337349
C6orf201	0.051360284	-0.044711502	-0.057362069	-0.179770386	-0.143917254	0.106364011	0.232456254	0.118222381	0.071313045	-0.062680663
EXOC6	-0.022211968	-0.141122649	0.453006067	0.557044559	0.500802699	0.489200895	0.586337006	0.278786444	0.665577511	0.466918296
GPC2	0.108055087	0.061943688	0.095763221	0.248466495	0.096328157	0.011911148	-0.0466132	-0.014008467	0.042470196	0.113603789
ASB11	0.062996033	-0.506356722	-0.048465092	-0.080624614	0.174270521	0.244038734	0.050805691	0.464448097	-0.021641683	-0.235675169
RTN3	-0.312023635	0.358055945	0.036927652	-0.128741167	-0.187684542	-0.064541199	0.118481396	-0.143393754	0.037928688	0.064109752
PSG7	0.002209644	-0.019239753	0.061616728	-0.154751616	-0.120018682	0.013281975	0.113795605	0.054232676	0.091888178	0.107924971
ADAM33	0.280496759	-0.26892053	-0.105300166	-0.381526286	-0.283570383	-0.213385091	-0.226597511	-0.055580872	-0.212768357	-0.041811407
WDFY3	-0.062981936	0.09061813	0.059299166	-0.059247296	-0.047369679	-0.148695648	-0.089326631	-0.116609827	-0.039124988	0.097470812
KIAA0586	0.068308242	-0.087429911	-0.292558687	-0.233926147	-0.153764929	-0.280902612	-0.379168973	-0.235028541	-0.47968451	-0.415428907
C8ORFK32	-0.119591976	0.026156794	-0.023277274	-0.123750959	-0.024934561	-0.006229489	0.015633317	0.116122114	-0.056857732	-0.137210348
STK10	0.083458766	0.184211155	0.23472055	0.397896824	0.371852321	0.303081757	0.224551368	0.219640041	0.225305702	0.043906881
GSG1	0.156437195	0.088149945	-0.140007213	-0.286253225	-0.252155953	-0.121853087	-0.161679366	-0.010471384	-0.204952022	-0.153768817
EPS8	-0.033976627	-0.2133789	-0.145546326	0.033365947	0.025550409	-0.197130205	-0.274119906	-0.173193328	-0.144314442	0.105245656
CAT	0.0423919	0.119849471	0.235604589	0.21891064	0.006247882	0.045323768	0.15463151	-0.088688571	0.259146617	0.375431144
RESP18	0.212062513	-0.045656962	0.092890972	-0.090325066	-0.032789918	0.125561988	0.104624931	0.082322009	0.109192822	0.091427404
IQCD	0.083087334	0.037728218	-0.027523322	-0.101354178	-0.141756283	0.056603433	0.169308836	-0.012401838	0.17275283	0.130106073
RBM11	-0.137261114	-0.133571426	-0.17425848	-0.365090009	-0.334685947	-0.274702834	-0.170630886	-0.158323638	-0.266066783	-0.206909081
RNF2	-0.037341718	-0.276313806	-0.13945441	-0.15817837	0.035665489	-0.013840525	-0.072575915	0.144160468	-0.123848953	-0.147084667
ADAMTS20	0.047514748	-0.100060548	-0.044288287	-0.06340918	-0.001438627	0.0790328	0.173499849	0.133806184	0.075443981	-0.0481379
MBTPS1	0.23806531	-0.269814351	-0.072625136	-0.20541881	-0.184980683	-0.262044631	-0.414269376	-0.179911772	-0.295870156	-0.077844584
TGOLN2	0.176785415	-0.072930934	0.224105208	0.344348212	0.372814918	0.530981957	0.464715614	0.594896486	0.455891503	0.096081134
ARMCX3	0.018821042	0.107629711	-0.051353822	0.226246134	0.10406905	-0.096417613	-0.124622909	-0.17629896	-0.076767816	0.010332129
TMEM25	-0.30503525	0.098533379	-0.180815536	-0.252056615	-0.154059581	-0.258979464	-0.292481295	-0.146592318	-0.319759077	-0.230653272
CXorf21	0.155565086	-0.176122089	-0.003882198	0.230446379	0.180599287	0.050343942	-0.116218758	0.0458747	0.05857701	0.141463175
TFDP3	0.041630749	-0.372535549	0.115440372	-0.052687189	0.118856501	0.209458683	0.157796065	0.316958621	0.174839501	0.044934282
MKL1	-0.110873899	0.242729752	-0.184205339	-0.033050573	-0.093101157	-0.231518484	-0.271584738	-0.254611274	-0.345806407	-0.306244234
ZFYVE16	0.078581029	-0.244060074	-0.124432962	-0.333618627	-0.217231825	-0.3826301	-0.441859425	-0.239406478	-0.486555783	-0.38687369
RRAGB	-0.027063503	-0.354040309	-0.087396083	-0.029715424	0.095119824	0.160731407	0.172339478	0.271877069	0.092383615	-0.081416429
FHOD1	0.234203056	-0.060085296	0.23934078	0.217134655	0.20196161	0.095515948	0.012222126	0.162775034	0.044695779	0.020951982
MSH5	-0.035456231	0.020812044	-0.039124281	-0.072482022	-0.054748723	0.031907919	0.158984992	0.028232259	0.133047659	0.132976705
MAP3K11	-0.187796477	0.246925495	0.182435682	0.236170625	0.238447877	0.068349354	-0.03575477	0.059561567	0.066700988	0.113181002
RORC	0.17844366	-0.065161866	0.172363403	-0.006780134	-0.00681161	0.094665578	-0.018130122	0.115833404	0.077439671	0.000272476
SLC38A2	0.061150141	-0.069508716	-0.637979061	-0.491781026	-0.315888553	-0.414811995	-0.435546954	-0.239027084	-0.64779158	-0.612099626
GSTM4	0.227920623	0.145323994	-0.040535663	-0.004608394	-0.132904304	0.068767346	0.195739795	-0.001550126	0.141859783	0.004520774
GRIK1	0.001928923	-0.027856072	-0.16027176	-0.247910082	-0.203684457	-0.228817531	-0.128862784	-0.097551461	-0.197725187	-0.129820653
GALNT11	0.023599518	-0.043807478	0.150860602	0.100852185	-0.047742	-0.046199698	-0.016235598	-0.162517385	0.101173703	0.283326089
BASP1	-0.01262016	0.17671475	-0.316337296	-0.224158304	-0.05563378	0.01587262	-0.027033457	0.033653181	-0.233728531	-0.458319635
CCT3	0.191989367	-0.229206432	-0.122622119	-0.022081448	-0.01096853	-0.149847584	-0.279877816	-0.089756112	-0.182526491	-0.054191812
EHD1	0.041013697	-0.020811586	0.338127064	0.274015338	0.14730992	0.137067616	0.111752865	0.056677242	0.251669492	0.269542927
RND1	-0.106498675	0.203449345	-0.527453318	-0.445057806	-0.348191367	-0.436881395	-0.428463697	-0.338738035	-0.653247209	-0.597032059
ITSN1	0.057280031	0.161562287	-0.047912212	-0.164434477	-0.154480551	-0.021380448	0.104463919	-0.040102482	0.007040823	-0.071035829
RPS16	0.235107569	-0.240007531	-0.211251333	0.11093335	0.052604044	-0.161483323	-0.166827671	-0.083372649	-0.094088341	0.068320685
UBIAD1	0.150976416	-0.079591799	-0.487958817	-0.449301301	-0.255118956	-0.342778141	-0.454392461	-0.135602744	-0.605373455	-0.562415115
EVC	0.085498453	0.207430951	0.218537099	0.337109993	0.233575651	0.260176434	0.300834859	0.198398071	0.226680671	-0.020202384
CWF19L1	-0.074039313	0.226314431	-0.178331235	-0.123660688	-0.248647991	-0.189809934	-0.097240571	-0.258595766	-0.16122061	-0.050062647
KCNA4	-0.049054143	0.008069843	0.031570254	-0.038555761	-0.018454404	-0.06766657	0.068276524	-0.054024989	0.082735878	0.236083832
RASL11A	-0.087124052	0.309209856	-0.476622795	-0.400846659	-0.370414153	-0.440193858	-0.377550377	-0.396768148	-0.570122017	-0.483376117
ZNF187	0.085276104	0.102883917	0.259869381	0.256325689	0.134098517	0.350840317	0.413809188	0.206708975	0.460312025	0.219230966
SETD8	-0.074946644	0.089459274	0.002809305	0.014551073	-0.042855729	-0.156550955	-0.227768349	-0.211072559	-0.156035844	-0.015477665
OR6C76	-0.057661766	0.159326155	-0.17623032	-0.052094559	-0.098126531	-0.119330391	0.068587577	-0.099004743	-0.047518704	-0.031748287
ANK3	-0.041073198	0.064639808	-0.00474378	0.184270102	0.049117739	-0.06160752	-0.040771602	-0.147450932	0.061247097	0.198871066
SCYL3	-0.12871108	0.363991607	-0.158583461	-0.138600036	-0.223067902	-0.149734116	-0.024884883	-0.308505991	-0.177194691	-0.220613838
TPST1	-0.084928039	0.124316187	-0.394211915	-0.26098585	-0.222863414	-0.394373152	-0.411558748	-0.340633477	-0.520918774	-0.361608806
MGP	0.069358793	-0.080244483	-0.155545788	-0.137591589	-0.039377912	0.013384801	-0.023444933	0.101784354	-0.169201867	-0.336769885
ABCC5	0.011640836	-0.120057708	0.287217757	0.447218186	0.320913248	0.329823901	0.284186875	0.22084878	0.371030091	0.234913611
FGFR3	-0.099796193	0.168096525	0.170265971	0.19849206	0.045151392	0.139379898	0.214886644	-0.013832358	0.215254441	0.111042037
TP53I3	0.130308252	0.123998552	0.179215678	0.259733694	0.248780033	0.268720032	0.325914066	0.205103372	0.295590776	0.128156676
C6orf129	-0.044405007	-0.003115998	0.316655025	0.268361084	0.133852331	0.071054967	-0.016779952	-0.049535544	0.207773115	0.340289173
SMC1A	0.134929641	-0.200124201	-0.054633843	-0.101392274	-0.074716258	-0.053674708	-0.075483282	0.003049476	-0.180525124	-0.267657861
C15orf23	-0.192965272	0.308954948	0.109296256	0.123729954	-0.012242072	0.089520254	0.140155694	-0.07790217	0.121767778	0.062598666
PPEF1	0.004030102	-0.285594232	0.073736784	-0.10711802	-0.035008762	0.144153362	0.253486718	0.166926698	0.162611806	0.057320644
DHX57	0.061550557	0.063871454	0.120954421	0.291900975	0.119622693	0.090021395	0.128332099	0.019983056	0.183920646	0.154865901
AGFG2	0.103988554	0.201515726	0.385825946	0.341044533	0.216614034	0.374317107	0.350685581	0.280528721	0.428082692	0.237725999
CSNK1G3	0.003500501	-0.195742132	-0.134958926	-0.234515789	-0.122512726	-0.262639578	-0.28212596	-0.134548979	-0.249198477	-0.069656088
UPP2	0.139107068	-0.450777376	-0.066292309	-0.041564494	0.192522157	0.176898386	-0.014920927	0.307294413	-0.044894717	-0.225964399
TTN	0.003787822	0.089183691	0.31860054	0.181530151	0.189153389	0.095946461	-0.047397755	0.114670273	0.114747641	0.174263299
KCNMB1	0.029204461	-0.023023696	0.07699969	0.032240689	0.095844595	0.020218093	0.04153701	0.141818549	0.026954995	-0.018593494
MGC42105	-0.081041838	0.253648075	-0.147087646	-0.252700537	-0.205502292	-0.24784556	-0.147891195	-0.161970422	-0.293242944	-0.261501161
ELF4	0.198673327	0.089012206	0.089816045	0.269673954	0.35422022	0.396371474	0.326521128	0.37534371	0.218366131	-0.167847655
MPHOSPH10	-0.078220805	-0.006253855	-0.464365042	-0.487549796	-0.283111899	-0.37560251	-0.409623276	-0.19377755	-0.635219239	-0.665394252
PAPOLB	0.098344671	-0.144155925	0.083010113	-0.037694561	0.150437386	0.213616303	0.118452269	0.309385243	0.136352349	0.044053989
KRAS	-0.079729695	0.07541758	-0.072844733	0.067866254	0.062771076	-0.139438158	-0.21135195	-0.164064224	-0.161829498	-0.077892982
LMBRD1	-0.051672712	0.007653733	0.164167997	0.276255492	0.216958174	0.348308637	0.44697041	0.155034719	0.561498552	0.551477794
PPYR1	0.051990095	-0.017317933	-0.000735406	-0.164250816	-0.085050205	0.06785631	0.137854045	0.093397017	0.044278826	-0.039061193
MRPL43	-0.081662473	0.052065013	-0.094637088	-0.03400932	-0.086494455	-0.117696103	-0.151019248	-0.042666576	-0.154381235	-0.141318068
LRBA	0.161872673	-0.393668995	0.119192975	0.183164988	0.263598844	0.253072357	0.05833737	0.297133786	0.180521833	0.094820878
PNKD	-0.06368791	0.259052682	0.250402369	0.172048382	0.154855049	0.344340596	0.462985397	0.235361867	0.407605656	0.148591087
DVL2	-0.06734862	-0.357766753	0.059029081	0.000731608	-0.070387939	-0.108352696	-0.128030808	-0.064268565	-0.024377707	0.206198726
GUCY1B2	0.184218044	0.04497459	0.008942742	0.108015912	0.010897942	-0.00473504	0.090110344	-0.016006942	0.127794838	0.207381076
LOC649159	0.028051541	-0.031403905	0.017887941	-0.122730721	-0.059295812	0.010850613	0.110152442	0.020716494	0.053283936	0.00347566
CDKN2C	0.094618974	0.313435293	0.202570234	0.207405892	0.04078175	0.045584253	0.012565453	0.005924915	0.078051242	0.106488355
FLJ41733	-0.093337843	0.173849522	0.00629192	0.151494448	0.063297873	-0.220609747	-0.207794671	-0.234869075	-0.103199065	0.136097243
KIF2B	-0.093997105	-0.004962243	0.086427471	0.079122015	0.097374205	0.141526083	0.183670345	0.118539963	0.136093067	-0.028777179
IL4R	-0.184963903	0.231010161	-0.447986832	-0.3478715	-0.303454804	-0.507228495	-0.472514028	-0.395732842	-0.682223138	-0.551674342
KIAA1632	-0.001904726	-0.011719559	0.129997654	0.171691251	0.117216561	0.019603519	-0.087581066	0.018077428	-0.028417534	-0.024513794
CCM2	0.089515961	0.128661694	0.227245982	0.181067214	0.053375654	0.143995765	0.235711926	0.096463536	0.223077767	0.073000013
COX4I1	0.38080354	-0.142307441	0.163025576	0.133307504	0.092045823	0.185332762	0.060927958	0.201031159	0.158928845	0.092292623
C20orf112	-0.081033154	-0.030710939	0.087462808	0.07987848	-0.00703968	-0.091409573	-0.00967456	-0.077443243	0.035649193	0.161566865
WDR91	-0.164382129	0.12134751	0.09646308	0.261394227	0.0602851	0.16622379	0.261283417	-0.025116545	0.254110288	0.234043614
CBR3	-0.209318983	0.149889848	0.110715272	0.030799231	-0.03638951	-0.132047111	-0.148407115	-0.164009815	-0.032035022	0.138455333
FLJ32784	0.127615973	-0.081238049	0.137414992	0.017278979	0.089872397	0.12149644	0.12498874	0.119841861	0.095486496	-0.007495064
POPDC3	0.116127306	-0.261083183	0.071997713	-0.0120088	-0.014744371	0.075086137	0.131230399	0.11948172	0.139466218	0.19438215
PPP2R4	0.085594075	0.263142221	-0.028348972	-0.127548842	-0.084767592	0.00257502	0.092968509	0.046980942	-0.037296687	-0.146769509
SECTM1	-0.068125186	-0.001793101	-0.094468264	-0.078875837	-0.12673033	-0.138142315	-0.065598446	-0.158499984	-0.000384705	0.142305681
FBXO32	0.091729296	0.15331275	0.147854416	0.207111117	0.060586668	0.070321679	0.1432223	-0.046684527	0.169190058	0.168742957
NOG	0.021454311	-0.206985023	-0.084270679	-0.163546047	-0.002756592	-0.002145152	-0.017795743	0.127004429	-0.120878844	-0.196196428
ZNF507	-0.155345255	0.050211467	-0.455257181	-0.341094537	-0.362508177	-0.414661254	-0.361988865	-0.352492016	-0.526159865	-0.396557732
MEGF10	0.113516976	-0.4765744	0.112579006	-0.074668365	0.035286155	0.057883452	-0.073673577	0.137030544	0.024093714	0.075650316
TTC8	0.061579424	-0.087438702	-0.000384307	0.071970754	0.024701831	-0.048769273	-0.170069878	-0.048266861	-0.086834679	-0.014237699
RNF215	0.041826575	-0.1151106	0.002399022	0.191564394	0.108540899	-0.089185214	-0.198589669	-0.096108228	-0.022323564	0.14853541
SPAG1	-0.194859746	0.262788426	0.02671335	0.109325544	-0.036826207	-0.033587546	-0.000288283	-0.166551431	0.026407784	0.078847932
FN3KRP	0.082815274	-0.038361586	-0.018833757	-0.01203246	-0.063787913	-0.072756949	-0.149637407	-0.112875441	-0.006640019	0.149971438
C4orf50	-0.089145317	0.050211608	0.109310714	-0.035415005	-0.019101831	-0.043110962	0.096074773	-0.017097063	0.098784106	0.156502116
PDHX	0.204470158	-0.184672665	-0.136464408	0.070825492	0.103340819	-0.007754339	-0.16170444	0.033623397	-0.004950397	0.111186664
NLRP7	0.06141383	-0.011374966	0.023058039	-0.145845454	-0.045786575	0.03106763	-0.000857586	0.138086596	-0.018116765	-0.081768069
ERCC1	0.021669031	0.165501333	0.144885934	0.265419297	0.107450322	0.076239896	0.045146743	-0.114902298	0.148495103	0.161636165
KIAA1324L	0.0609734	-0.019791188	-0.268281374	0.010958892	0.009224499	-0.118841833	-0.244617774	-0.086004372	-0.258283701	-0.24153275
IFNA17	0.062277346	0.070809485	-0.134990865	-0.003214797	-0.113446249	-0.161241003	-0.212635603	-0.159592449	-0.20033577	-0.10497021
IPO7	-0.071138826	0.061115705	-0.246976788	-0.076039133	0.071801004	0.098217025	0.114466586	0.070547172	-0.00012192	-0.15666165
SUCLG2	0.236443673	-0.209633392	-0.041403796	0.116249618	0.09757584	-0.055141035	-0.188401616	-0.028874021	-0.008206097	0.133367497
SIGLEC5	-0.072709676	0.202321001	-0.254010995	-0.20236179	-0.201631878	-0.131418987	-0.044571794	-0.149594653	-0.207403032	-0.224206112
DCHS2	0.048553835	-0.159541398	0.129575649	0.200915107	0.162426805	-0.026620322	-0.071158839	0.039425723	0.068006036	0.284074983
RAB2A	0.098329105	-0.095386392	0.199121071	0.254488879	0.208498024	0.14969172	0.057087842	0.053773081	0.207627209	0.249174242
TRPT1	-0.084123418	-0.088880344	-0.150162103	-0.177474842	-0.229865682	-0.275435636	-0.357868242	-0.221238141	-0.280142755	0.008675875
ZMYND8	0.008693174	0.128138737	-0.061778259	-0.237423999	-0.231170197	0.019693093	0.232292497	-0.045473021	0.027130499	-0.091901418
SPATA7	-0.109163417	0.082532583	0.085156801	0.019411443	-0.169823896	-0.094048824	-0.039360173	-0.172053222	0.048409653	0.217453304
PHKB	0.033108457	0.107300648	0.362762626	0.355547548	0.351564174	0.510958061	0.538062825	0.39592481	0.542910866	0.247944709
UCN2	-0.21798599	0.062105357	0.083630664	-0.008168275	0.009532957	-0.076222223	-0.025115678	-0.167494177	0.048632759	0.258832366
CA1	0.002548726	0.141683798	0.225763588	-0.042627421	-0.076288557	-0.054950151	-0.019808091	-0.136475289	0.114953045	0.355673595
MTHFD2L	-0.121178417	-0.111877173	-0.594537182	-0.56518367	-0.421901302	-0.493681938	-0.563031612	-0.391668803	-0.660970177	-0.469075378
KRTAP3-1	0.08706971	0.007401186	-0.099189104	0.020592376	0.031830899	-0.011892842	-0.012043926	0.04774007	-0.065917917	-0.136606409
RAC1	0.180274677	-0.146006987	-0.074302445	0.150151984	0.140461563	0.054965427	-0.119736227	0.110464461	-0.044358004	-0.050411744
TMEM98	-0.150475582	0.048571993	0.3749388	0.379225781	0.252883683	0.330844106	0.317847298	0.284086594	0.447096597	0.359986316
PARD3B	-0.066793279	0.02968669	0.151847954	0.144687041	0.106566834	0.097772543	0.11780598	0.098083306	0.136431603	0.033778052
TUBA3E	0.03052076	0.003101955	-0.095427808	-0.195647801	-0.083911454	-0.027837068	-0.014672353	0.066888852	-0.083398256	-0.125379667
SLC26A4	0.170823197	-0.272754251	-0.326704491	-0.347351121	-0.259782948	-0.336775355	-0.339180894	-0.131620743	-0.390604104	-0.270749787
BRAF	-0.10423703	0.250477504	-0.117360958	-0.169726341	-0.129236594	-0.000177048	0.163451221	0.005835046	0.005736077	-0.13483244
THAP7	-0.075379462	0.121053185	-0.117024424	-0.007282706	-0.136184244	-0.210711862	-0.273987222	-0.262118282	-0.208775278	-0.075310628
RIOK1	-0.154492399	0.326174736	0.052422848	0.149527103	-0.034678126	-0.190061639	-0.054313673	-0.318560791	-0.030328642	0.114127185
MANSC1	0.073655905	0.061301939	0.051989908	0.072455242	0.13516075	0.3453186	0.43185549	0.313716732	0.269183048	-0.017170238
FAM139A	-0.073155571	0.033584149	-0.334650875	-0.248660253	-0.094566774	-0.166895077	-0.172234206	-0.029293409	-0.337011807	-0.346690244
APEX2	-0.174329122	0.332570385	-0.004296554	0.04787893	-0.061828161	0.05686061	0.129065229	-0.086133561	0.047855299	0.00148794
C2CD2	0.186724891	-0.037532392	0.301835658	0.211985908	0.168066569	0.066916665	-0.069545506	0.096524368	0.067510774	0.056142867
MTMR9	0.121910418	-0.299198448	-0.190881985	-0.101604883	0.080443996	-0.107135486	-0.333378828	0.061827209	-0.276884447	-0.2121097
FAM125B	0.161965775	-0.17783691	0.513048816	0.275336697	0.181205744	0.378102286	0.415901535	0.366576557	0.476290871	0.292662053
RELL2	0.063431611	0.147733292	0.172804769	0.30425705	0.155400947	0.149324349	0.123976652	0.033220121	0.18310641	0.099985073
DTNA	0.142442021	-0.10026788	0.491943186	0.495061247	0.485637252	0.562002091	0.615411936	0.45768448	0.583122034	0.254739358
TSHB	0.168579593	0.157941821	0.084870342	-0.064567392	-0.202270559	-0.288099991	-0.361886211	-0.240725814	-0.215038229	0.061314422
POLD1	-0.086912665	0.062990627	0.190322812	0.240306877	0.183175044	0.070542817	-0.040423305	-0.04281204	-0.006481222	-0.062205686
ACTR5	0.098388754	0.034162058	-0.018744279	-0.118957734	-0.242538675	-0.298944848	-0.310304017	-0.354575103	-0.185460352	0.080275892
C11orf35	0.031923966	0.200277381	-0.229430904	-0.077637147	-0.179525378	-0.199904305	-0.209478229	-0.227241496	-0.233512345	-0.165533145
RGNEF	0.062812344	0.075377998	0.214132299	0.26699541	0.205494696	0.257348669	0.203885743	0.172642556	0.254417227	0.112810431
GLIPR2	-0.076375389	0.072596878	-0.341081158	-0.125478025	-0.042061769	-0.142321655	-0.120420843	-0.062325688	-0.377077067	-0.472367724
INPP4A	0.018856719	0.18994565	0.267317949	0.269579427	0.167499641	0.137063422	0.193201213	0.027864602	0.138124721	0.021437485
SH3KBP1	0.074579941	-0.212443429	0.203353159	0.265322985	0.217710145	0.245283636	0.250515313	0.190143056	0.229798997	0.042238046
GRB10	-0.003922585	0.17758773	-0.037486923	0.212798086	0.0574266	0.053301394	0.063998292	-0.099725926	0.121224549	0.107065335
FAM89A	-0.126914725	0.150188215	-0.434901551	-0.29132716	-0.233832719	-0.353104624	-0.359783513	-0.38218309	-0.488840464	-0.355955822
SHH	-0.157008346	0.294991053	-0.089329975	0.008266816	0.007525277	0.021006728	-0.01361261	-0.073960677	-0.042558011	-0.067824088
FAM131B	-0.34416083	0.214469551	0.029125782	0.086959813	0.001049144	-0.037661702	0.062889319	-0.224376732	0.140771583	0.305183821
C10orf111	0.126462687	0.034811932	0.155480161	-0.073242819	-0.06691876	0.057677431	0.029079693	0.101940273	0.100800298	0.071165237
THEX1	0.045858198	-0.179952886	-0.12371918	0.035798004	0.094115811	-0.050413942	-0.2289631	-0.018298751	-0.208295019	-0.208862118
TMCO5A	-0.014101121	0.014718269	-0.030107368	0.105957495	0.004283873	-0.114618747	-0.13353215	-0.211809443	-0.030610501	0.129673794
C14orf2	0.183463388	-0.133851438	0.271665134	0.093677577	0.024409875	0.07086246	-0.094062409	0.023577004	0.147298201	0.228265173
GLT8D1	0.023280866	-0.019270008	0.371341223	0.481047247	0.381769401	0.459492708	0.415408303	0.29654997	0.546988549	0.365622509
ANK2	0.03315066	-0.051936508	-0.155702318	-0.270845154	-0.188048727	-0.13373146	-0.010662279	-0.022280571	-0.182880081	-0.199145296
HTR7	-0.084118404	-0.094842401	0.045994899	0.187430515	0.079994123	0.186677575	0.274434551	0.097075746	0.310271899	0.312720834
RFXAP	-0.091698661	-0.25827205	0.046359671	0.019779429	0.054836085	-0.017960669	-0.135077566	0.021902122	-0.030941017	0.003502376
RPS6KA3	0.03577431	-0.241908695	-0.116011714	-0.005682458	0.054142081	-0.112724364	-0.305393993	-0.042318481	-0.266872843	-0.226245428
ERF	-0.107600465	0.200681828	-0.399083832	-0.478327083	-0.416845782	-0.353705286	-0.247247768	-0.243551014	-0.454027222	-0.391832091
PAAF1	0.103601131	0.045973211	0.441675127	0.335261358	0.211131332	0.329190008	0.317610442	0.155687164	0.443863938	0.32627174
ZNF428	-0.088820524	0.028865581	0.208711427	0.395087068	0.302975973	0.32054921	0.291322868	0.288361636	0.431359658	0.355440121
HIC2	0.133873554	0.127859984	-0.023258626	-0.070916474	-0.023422349	0.21246266	0.306851543	0.212336925	0.128820036	-0.161793629
CDC42EP2	-0.105239433	0.092636473	-0.334131857	-0.275886024	-0.190343213	-0.275384777	-0.299027694	-0.193031362	-0.335489867	-0.1910716
TMOD2	-0.137473095	0.093367639	-0.065358668	-0.320952722	-0.327648307	-0.329369936	-0.27175017	-0.259707426	-0.298726086	-0.097001275
PIK3AP1	0.026287104	-0.305454223	-0.060634515	0.065901852	0.192439936	0.027215013	-0.211860896	0.117584653	-0.132278578	-0.153097074
CLK1	0.036059571	-0.05139576	-0.348751287	-0.141388377	-0.070294677	-0.068945257	-0.046725685	-0.024149919	-0.041756308	-0.022597759
FAM174B	-0.053129242	0.036863283	-0.40978713	-0.372350109	-0.379944324	-0.425730275	-0.396544709	-0.372770693	-0.535535554	-0.379566638
ATP5J	-0.00676377	0.186875827	-0.042854978	-0.010042059	-0.161483044	-0.172824256	-0.057720742	-0.278980216	0.012780928	0.157474913
HOXA3	-0.299305261	-0.055266335	-0.013390194	-0.313187212	-0.267629653	-0.223752615	-0.188881167	-0.11762818	-0.158672539	0.016675487
OPA3	0.069704769	0.060619517	0.280461393	0.203724421	0.232626121	0.405380168	0.469961668	0.272353295	0.451802076	0.237143077
IL10RA	0.0400396	0.113344051	0.193821544	0.224002654	0.073828041	0.278053966	0.443971918	0.142642012	0.376087865	0.171758684
LRRC17	-0.114149459	-0.151058222	-0.185666392	-0.277699661	-0.243352681	-0.356735073	-0.26476626	-0.141268009	-0.333961633	-0.195742358
GAS2	-0.073866773	0.274268744	-0.069161918	0.153975378	-0.017869502	0.057385449	0.329799371	-0.069321366	0.202666369	-0.000236641
SLC15A1	0.025472604	-0.052005741	0.151798439	0.183312055	0.087913998	0.128274326	0.106982863	0.192675199	0.243400666	0.296428187
BAIAP2	-0.107537503	0.036973324	-0.097604295	-0.071284821	-0.176695959	-0.328217157	-0.295646718	-0.327714477	-0.24156253	0.000423828
LMX1B	-0.019687978	0.039637661	0.065459722	-0.130421392	-0.086900697	-0.006926662	0.112162611	-0.039950766	0.098665934	0.114069038
UBOX5	0.020109162	0.420737119	0.021736306	0.126076254	-0.078931617	-0.25248715	-0.1851344	-0.319043297	-0.115950723	0.074955182
GBGT1	0.209688037	-0.119131597	0.172509575	0.25423788	0.257832235	0.300977033	0.231623224	0.273445746	0.221835451	0.039289512
CDC5L	0.04513854	0.002154353	0.325888737	0.325915243	0.298130738	0.342278489	0.231494491	0.278876535	0.395881275	0.320180583
EZH2	-0.322844511	0.163196277	-0.148117363	0.239311002	0.287826195	0.131362347	0.111621259	0.024191103	-0.03272561	-0.2543152
RHOF	0.197504487	0.033095586	0.174391559	0.122425173	0.081572672	0.213674496	0.280816374	0.16977588	0.287512778	0.182877159
ORAI2	0.051542583	0.366119747	-0.064535294	0.095589758	0.037587493	-0.113401822	-0.103370858	-0.159478014	-0.125456919	-0.059677243
POGZ	0.08267096	0.179918002	-0.032283145	-0.062181594	-0.161398894	-0.114539847	-0.060686017	-0.093465941	-0.156991096	-0.190549382
PRRG3	0.010629037	-0.342706749	0.033859568	-0.151546526	-0.025744374	-0.123892402	-0.16101638	0.054883995	-0.134033318	-0.013300642
MGC16703	0.074195569	-0.077936027	0.187619767	-0.072801715	-0.149608397	-0.117409689	-0.080889251	-0.118982256	0.051376506	0.254194481
RASAL2	-0.067572023	0.069756037	-0.108058776	-0.209006122	-0.267958973	-0.137599246	0.050765353	-0.152297999	-0.07191182	-0.082016405
ABCD2	-0.092179473	0.190120931	0.087222906	0.348348136	0.213359407	0.194205243	0.153985174	-0.008668128	0.253227298	0.189353332
DLK1	0.162972522	-0.013429461	0.025154019	0.000530988	0.058122258	0.066679824	0.105992177	0.116524528	0.13443362	0.118761301
NUP160	0.172047192	-0.055853044	-0.302844165	-0.443258031	-0.36262027	-0.369237486	-0.320496544	-0.292480609	-0.452651426	-0.374187608
PRDM2	0.027900424	0.127067573	0.04781404	0.089810226	0.136946342	0.208526653	0.154648614	0.261469081	0.076514044	-0.112316558
HIST1H2BL	-0.246621774	0.121476658	-0.125224411	-0.141991145	-0.182485224	-0.272874042	-0.166540999	-0.22745231	-0.154194708	0.03999268
CABLES1	-0.127607829	0.118751398	0.274686716	0.217771469	0.036165371	0.13017008	0.23640263	-0.03239715	0.262803569	0.251712915
CSN1S1	-0.030063101	0.022633216	0.053517648	-0.090918519	-0.062252057	0.015732824	0.183872402	-0.055516779	0.145534488	0.158098889
PLAC8	-0.146120667	0.19064946	0.14117461	0.267255192	0.144340484	0.304771216	0.32806267	0.134246417	0.365576739	0.189934993
COL4A1	0.030243953	0.049973802	-0.208046556	-0.075112063	-0.018129041	-0.015115439	0.030898715	0.023194862	-0.205062941	-0.358796457
PCDHGA12	0.073767658	0.101344565	-0.075696343	-0.015840834	-0.007180506	0.007242721	0.099024826	0.140836277	-0.037473977	-0.127230748
HSD3B7	-0.216357165	0.150418723	0.068888076	-0.031027313	-0.097439236	0.078626922	0.254641653	-0.036959006	0.212548464	0.274410526
SOX3	0.011025079	-0.423539746	0.111845563	-0.038155386	0.11347385	0.263723205	0.262819117	0.283114231	0.259332365	0.127674187
OR10Q1	0.07036503	-0.137703668	-0.007539873	-0.058370108	0.039959398	0.150574203	0.222321039	0.204058907	0.13424228	-0.00050808
CCDC64	0.138409252	-0.154751206	0.1844629	0.29079048	0.334328258	0.24308537	0.127767914	0.279762642	0.226615655	0.172245444
C20orf152	-0.173466578	-0.039880672	0.019533595	-0.086767928	-0.107880141	-0.168653559	-0.122929878	-0.200124898	-0.049858233	0.087915692
ECH1	0.023156084	-0.170778619	0.334448884	0.087807606	0.141127554	0.264996738	0.190576791	0.11388216	0.346111751	0.409199061
ST6GAL1	-0.026158639	-0.071633477	-0.05720726	-0.206188771	-0.120933302	0.007735689	0.10891167	0.074395687	0.01593848	-0.103988518
PER1	-0.061461959	-0.045717462	-0.101003421	-0.109141732	-0.116001025	-0.142915354	-0.153424118	-0.101524603	-0.229103262	-0.212572651
CSTF2	0.068093723	-0.290733156	0.057990911	-0.01209725	0.076679318	0.058913825	0.028803135	0.054733208	0.010992485	-0.095880717
SH3D19	0.193488894	-0.222726798	0.011658927	0.114032638	0.185081267	-0.017287527	-0.094178266	0.019131807	0.012265368	0.161410435
TMEM188	0.062329264	-0.28034509	-0.139704885	0.023817362	0.135014512	-0.006653388	-0.094951421	0.035080526	-0.040348466	0.028496869
ECD	0.009619908	0.226690718	0.103971139	0.139536877	0.119699896	0.311832353	0.454618053	0.210256342	0.372070622	0.141426816
MSH4	0.052773746	-0.144181706	0.050528604	-0.075971559	-0.088197662	0.03231185	0.247682609	0.072571123	0.200391286	0.22318031
DPRX	-0.018067697	0.008471504	0.117540779	-0.010932634	0.075850791	0.077357553	0.082633328	0.12507812	0.083205284	0.040358362
SNCG	0.107893487	0.012473623	-0.119524423	-0.326768585	-0.374903081	-0.314360081	-0.289475203	-0.274369674	-0.27993087	-0.159750397
ZSCAN2	-0.096143288	0.159407597	0.040285489	-0.001832596	-0.045711048	0.014023805	0.143034105	0.003941276	0.147301927	0.144430605
AAMP	0.09159207	-0.190419723	-0.03036374	-0.055107893	-0.101417388	-0.20624399	-0.324860755	-0.185071807	-0.195267232	0.040258083
CLEC10A	-0.078854214	-0.256437618	0.008454582	0.190213898	0.234753236	0.22339078	0.003513709	0.170393817	0.096739642	-0.018599864
GCNT2	0.029464252	0.12097291	-0.210044401	-0.021622541	-0.206997215	-0.380098555	-0.308719722	-0.274031535	-0.271544886	-0.034072144
SLC22A17	0.082661551	0.162118509	-0.039632282	-0.027365938	0.093028099	0.082314683	0.023515663	0.165993133	0.008165488	-0.115386963
EFEMP2	0.0807171	0.035274425	-0.149309304	-0.011784208	-0.012900202	-0.003065298	-0.052500798	0.137945496	-0.148656425	-0.278617854
ZWINT	0.07184381	0.031557673	0.319241438	0.493641727	0.357144366	0.366081032	0.339618913	0.229909782	0.453141338	0.310666662
ATP1B4	0.001404872	-0.373392703	0.111334453	-0.148865097	0.00265567	0.163113854	0.130210514	0.269642971	0.176404941	0.126943048
PITPNM1	-0.017771319	0.083853206	0.206696134	0.342195756	0.264206603	0.196300368	0.087706309	0.036452316	0.174983853	0.104386951
C3orf22	-0.03118075	-0.038039494	-0.005202686	-0.177312353	-0.157182209	-0.090369136	-0.073699692	-0.030401236	0.005257683	0.152407243
HIST1H1B	-0.00032203	-0.015859341	0.347750132	0.322553429	0.222436216	0.111992127	-0.078870003	0.009995158	0.175693414	0.306021738
GPRIN1	0.202274489	0.025956337	0.071088146	0.111147424	0.036367198	0.104268046	0.020235305	0.119512311	0.164807112	0.170945067
DNAJB14	0.142519988	-0.232516045	-0.086079071	-0.050181134	0.075362912	-0.09272058	-0.166966318	0.082430007	-0.193851409	-0.14816971
GPR26	0.09939751	-0.181378983	-0.308260999	-0.281623598	-0.314867318	-0.340765897	-0.243853264	-0.22994657	-0.354471431	-0.30903652
MUC20	0.187381589	0.103138942	0.041141283	0.102904862	-0.080108718	-0.131465708	-0.041191948	-0.173379322	-0.038630386	0.02070692
LCE2A	0.143614359	0.056520651	0.323907261	0.018750726	-0.030165916	-0.074248441	-0.117475258	-0.032486149	0.051796367	0.279728916
APP	0.088179468	0.130522911	0.123854731	-0.028684806	0.021420069	0.210340846	0.259323792	0.222181663	0.138953878	-0.05721318
PFKFB4	-0.000341474	0.118657411	0.096354876	0.068885083	0.028681625	-0.074456188	-0.119471897	-0.10605236	-0.116899514	-0.07469198
ZNF580	-0.102793991	0.366958539	-0.012152971	0.130804762	-0.063909871	-0.185630094	-0.013138246	-0.307961227	-0.014463887	0.079195213
MC1R	0.097687377	-0.012770714	-0.292646644	-0.10947582	-0.12808001	-0.243789683	-0.31149857	-0.159936858	-0.365220681	-0.305125669
IL22RA2	-0.106300458	-0.112901241	-0.041872412	-0.078847396	-0.071684967	0.043382085	0.314806468	-0.079206663	0.158125551	0.066649059
HAUS6	0.062284817	-0.273718918	-0.193010704	-0.125332363	0.106898962	0.033506207	-0.181986041	0.172711193	-0.215589575	-0.308165765
USP32	0.133279328	0.039584572	-0.060647001	-0.074484177	0.076080633	0.085494421	0.062462255	0.078159574	-0.097145347	-0.271885915
RECQL5	0.0899615	0.087746592	0.109636446	0.115723911	0.084321878	0.310138245	0.429148322	0.248588049	0.338205284	0.090287936
DUS1L	-0.136211478	0.084782407	-0.103901758	-0.006500507	-0.039017954	-0.110464303	-0.186102791	-0.192145936	-0.157150683	-0.11162372
FUT3	-0.032453415	-0.060880015	0.004332698	-0.023143292	0.043467164	0.051050739	0.06055903	0.095445823	0.10086659	0.127300736
TAF12	0.023910476	0.216484539	0.135160018	0.133949266	0.004056975	0.068818875	0.136769469	-0.122147546	0.148734306	0.12480329
ATP8B3	-0.062234876	-0.004574793	-0.027246344	-0.154239374	-0.175869757	-0.25396716	-0.190371702	-0.229094655	-0.121660118	0.0597065
FAM171B	0.031254729	-0.075019044	0.041306071	-0.028430125	-0.032349592	0.04718818	0.218737092	0.090866545	0.193072505	0.220155081
KIF3A	0.15593047	-0.266052726	0.052715206	0.034669604	0.120022061	0.046407383	-0.138820892	0.126258355	-0.063551294	-0.016191585
SULT6B1	0.081067171	-0.253431829	0.030390093	0.064760127	0.168086828	0.000733374	-0.067076534	0.124317274	-0.02465899	-0.011597917
NKIRAS2	-0.054884592	0.178060278	0.330209974	0.280044183	0.159477115	0.212359741	0.20515255	0.103284942	0.316541535	0.356237702
RAXL1	-0.042746801	-0.15964615	-0.13076046	-0.292108184	-0.219741572	-0.309022983	-0.350909104	-0.1905975	-0.283494045	-0.101851982
SPINK9	0.038254238	0.020351663	-0.084084845	-0.149408001	-0.170582127	0.019351276	0.154848929	0.02186619	-0.006333789	-0.154936383
SLC35A3	0.073358279	-0.264603813	0.114442129	0.195830603	0.258074784	0.294466879	0.287742861	0.232082903	0.370485163	0.288647085
HNRPDL	-0.003208233	0.337169257	-0.196092491	-0.090155206	-0.272464735	-0.18314805	0.073345759	-0.29676571	-0.049833419	-0.007235016
DMD	0.04829828	-0.381811981	0.126603899	0.004006129	-0.025612458	0.001705989	0.058281791	0.013785712	0.069494297	0.122606057
PHF14	0.146656188	-0.352260477	-0.030995607	0.020963474	0.118874147	0.009227927	-0.217754508	0.110562082	-0.118427372	-0.115076734
CDK2	-0.048687889	0.263862148	0.111387957	0.177586996	0.101670243	0.265126315	0.348163817	0.099670272	0.24693766	0.025976517
PSORS1C2	0.02857444	0.023295144	0.175320108	-0.089313741	0.008448061	-0.01056829	-0.03863879	0.066533484	0.010001103	0.074985168
MID1	0.058713883	0.023484044	0.04689834	0.131645116	0.022433916	-0.067087578	-0.187701576	-0.050385176	-0.014672611	0.148622592
IL11RA	-0.043931073	0.251411596	-0.154692596	-0.098615934	-0.278345011	-0.37140301	-0.359503279	-0.317700195	-0.306240533	-0.113728363
MGC48628	0.029694262	0.074967131	0.084360487	0.161592256	0.078333254	0.049388575	0.085464075	-0.099621774	0.154162819	0.14158899
SULT1C3	0.032077183	0.013494835	-0.038072442	-0.129324678	-0.054878119	0.070515022	0.150357036	0.099021406	0.027681268	-0.137932443
HES4	-0.046714826	0.142668278	-0.305891344	-0.172322563	-0.151428141	-0.173692258	-0.206384224	-0.101396289	-0.356732429	-0.416624045
KENAE	-0.032115107	-0.205902946	0.131017154	0.106683891	0.150856923	0.2502843	0.116999931	0.247762094	0.15070344	-0.031777811
S100A1	0.125876352	0.05058298	0.111734368	0.007777306	-0.004760343	-0.192243827	-0.333366311	-0.096856166	-0.198245961	0.000853894
GLUL	-0.126045536	0.209557372	0.398901623	0.2099271	0.092396149	0.30451013	0.52920692	0.109840048	0.537725042	0.418395239
IGSF6	0.045826325	0.075042797	0.040313915	0.203821049	0.150859452	0.005985127	-0.084058652	-0.060266014	-0.04307991	-0.023359908
SEMA3B	0.331505283	0.171948643	-0.139194042	-0.282056069	-0.261760248	-0.151023368	-0.132918287	-0.084971715	-0.18342733	-0.163336517
EDG1	0.192451008	-0.031651995	-0.234676879	-0.245765987	-0.068700103	-0.106253256	-0.33055034	-0.071899039	-0.292355244	-0.248922501
SIKE	0.119486393	-0.128855611	0.089688584	0.08574421	0.190835492	0.245679047	0.186052151	0.286336667	0.147754719	-0.030628072
TEX10	-0.047238026	0.044701545	-0.037995932	0.172415023	0.058571014	-0.073248993	-0.117456517	-0.161989577	-0.004603396	0.127121445
C14orf80	-0.131651432	0.125688297	0.540587683	0.468538086	0.253512619	0.20218202	0.221367097	0.058467701	0.462776016	0.582776827
XYLT1	0.128630433	0.126556966	-0.029900749	-0.083509531	-0.076850121	-0.124980919	-0.176094778	-0.054241942	-0.157500896	-0.036267955
TRIM40	0.015738586	0.062938671	-0.08788185	-0.280574422	-0.286723223	-0.241166218	-0.061855551	-0.1570647	-0.158499987	-0.121913597
ATP5D	-0.102166931	0.270157003	0.30529169	-0.0201527	-0.152462642	-0.137507178	-0.046311491	-0.26631359	0.056041612	0.252306659
KCTD9	0.20711759	-0.344889799	-0.164045701	-0.066645636	0.020702145	-0.031945937	-0.140926443	0.117017443	-0.158422156	-0.18790463
PIGO	-0.129419556	0.222668203	0.009958044	-0.109111545	-0.261045561	-0.050062482	0.183318721	-0.176843721	0.053494817	0.066728644
ZZZ3	0.203972395	-0.292016528	-0.156819182	-0.140441464	-0.103810356	-0.144636425	-0.169246332	-0.139319553	-0.063632297	0.07956623
UBL7	-0.090276452	0.28424359	0.178603983	0.227562439	0.037420434	0.205914997	0.413891787	-0.003895534	0.442940395	0.370096063
GPR63	0.010730826	0.021246882	0.082918078	-0.038248121	0.013652876	0.118222743	0.240594043	0.101013427	0.161644172	0.074069907
PTPRC	-0.084004508	0.250401138	-0.092285076	0.072741521	-0.001011769	0.013600533	0.083133453	-0.077339559	-0.042365301	-0.128227462
KLHL7	0.061614618	-0.088604948	-0.059853518	0.00286079	0.014427933	-0.043515819	-0.172494008	-0.005054558	-0.128477939	-0.103884823
CUL3	-0.083065875	-0.021656808	-0.309502046	-0.162246924	-0.28650542	-0.39877619	-0.34831943	-0.36380425	-0.349182951	-0.092516039
GALNT9	0.104761761	-0.049899993	0.083002085	-0.153839309	-0.153504259	-0.017793246	-0.002201758	0.031444744	0.078274872	0.143839577
IL9	-0.286229944	0.308406922	-0.010814476	0.034115756	-0.056504867	-0.042389317	0.033612752	-0.254845613	0.080090803	0.154327284
CORO1B	-0.074503306	0.119546637	0.208496067	0.20233632	0.187400729	0.034681129	-0.106524612	0.027569473	0.057079836	0.151947531
TIMM9	0.052760021	-0.073668737	-0.344712	-0.433149299	-0.35213057	-0.290986776	-0.303839849	-0.29425754	-0.353146724	-0.242943357
FZD2	-0.226684377	0.038248917	0.125787832	0.032880691	0.017101041	-0.036630834	0.008691362	-0.136674986	0.147824493	0.365849353
UAP1L1	0.176350585	-0.057303667	0.069690023	0.014509778	0.039832553	0.086023351	0.148473537	0.10923113	0.156835392	0.131035561
ZFAND2B	-0.112608995	0.191132858	0.084706586	0.124254931	-0.030556597	-0.118784011	-0.20415516	-0.190958575	-0.048445251	0.143130181
ITGBL1	0.193013235	-0.405987189	0.019040087	0.121325257	0.246372758	0.216519081	0.027407862	0.296605587	0.056771101	-0.080087997
ERBB4	0.055390281	-0.191905041	-0.140857878	0.024546903	-0.01492853	-0.068274475	-0.116523171	-0.07019226	-0.033211008	0.101192704
OXCT2	0.163073015	-0.253662204	-0.255663184	-0.431799004	-0.239939777	-0.204501285	-0.230387851	0.016621662	-0.351781349	-0.324735361
CST11	0.001242104	0.007734906	0.12689386	-0.086455395	0.00269968	0.051168633	0.037031447	0.045550231	0.094149766	0.156353923
SOX10	0.167014644	-0.185582869	-0.21669724	-0.285823106	-0.161445691	-0.21974321	-0.321015107	-0.063359884	-0.329078749	-0.193343164
MYCN	0.007257311	0.25157519	0.064641144	-0.040461613	-0.18077959	-0.270400363	-0.115140317	-0.264928508	-0.043684056	0.212972898
NRSN1	0.157507868	-0.110813864	0.050981889	-0.214663323	-0.082987201	0.060443076	0.110483341	0.11498118	0.026202445	-0.036150939
CCL24	0.024293097	-0.037763703	0.10647529	0.046116968	0.052266218	0.067476191	0.087006271	0.098566579	0.185739783	0.303113916
WDR63	-0.016310631	-0.240777638	0.053152717	-0.01917579	0.178782826	0.140242647	-0.1107097	0.321301841	-0.050807548	-0.116856167
MLC1	0.037110845	-0.046419348	0.067412619	-0.114323709	-0.10875609	-0.02705087	0.005583795	-0.001684583	0.0082386	0.0536053
RNF208	0.037424526	0.141930752	0.129363742	0.176824509	0.09041235	0.092458564	0.013089386	0.037443852	0.089232825	0.060828475
PDPK1	0.115424846	-0.041012965	0.34727465	0.211796677	0.236742613	0.43062394	0.463740187	0.338104508	0.422256277	0.112854501
C6orf62	0.203563797	-0.241708748	-0.09261347	0.232886344	0.240775172	0.163824848	0.107819141	0.196449355	0.226567636	0.227064448
HBBP1	-0.049252907	-0.150100952	0.031923779	-0.065076954	0.036417961	0.118371847	0.175698342	0.127804417	0.084898737	-0.024526741
ADRA1A	0.082125514	0.11190664	0.152464275	0.05417385	0.062624384	0.276404968	0.376092426	0.2289896	0.252601715	0.01430389
LAMC2	0.004308452	-0.183911657	-0.10492114	-0.146420072	0.007592457	0.039834515	-0.046056036	0.123706386	-0.103679415	-0.155481036
FGF13	-0.030751516	-0.276378212	0.104702061	-0.118846305	-0.072508858	0.191223805	0.174008582	0.147777367	0.164222325	0.003628016
CHFR	-0.069719009	0.111504579	-0.086472024	0.017205187	0.03321261	-0.171345106	-0.301265747	-0.186980789	-0.252189713	-0.123379015
OGFOD1	0.13257368	0.199827651	0.039360257	0.130860334	0.19660639	0.344287001	0.3867183	0.21131898	0.259273501	-0.040150866
C11orf41	-0.10389829	-0.120323954	-0.080437314	-0.151217193	-0.202538728	-0.198992548	0.003104449	-0.170918065	-0.057691712	0.097443312
STS-1	-0.108489997	0.047478227	-0.21784192	-0.09782424	-0.134767602	-0.199205693	-0.097938047	-0.212602224	-0.253185649	-0.247921749
SCMH1	-0.079808432	0.273637128	-0.152344663	-0.049373366	-0.045777925	-0.11137719	-0.014642751	-0.087837414	-0.159450732	-0.227628113
ZNF483	0.064654256	-0.09299009	-0.118056768	-0.016258078	0.084356867	0.075278927	0.041055103	0.217955578	0.034872835	-0.040189736
NAMPT	-0.00919056	-0.015718781	-0.420626944	-0.293531104	-0.09518163	-0.088542351	-0.073824144	0.013321524	-0.309157566	-0.39980182
CACNB2	0.161660701	-0.255761361	0.027468869	-0.145898688	-0.148936255	-0.090394701	-0.142988379	-0.016230435	-0.009121794	0.116272956
ATRIP	-0.041669597	0.000860301	0.183865369	0.174873423	0.021323345	-0.022383273	0.100090589	-0.137431523	0.155284857	0.241794365
SNORD83A	-0.075716589	-0.078105959	-0.313646091	-0.286780971	-0.314324961	-0.436941147	-0.454914143	-0.353018251	-0.478681339	-0.285163114
USP2	0.074525728	-0.070594919	-0.065735444	-0.133481699	-0.072667829	0.020663414	-0.045132775	0.154282896	-0.06199847	-0.078276571
ITGB4	0.201774085	-0.235817054	0.057808257	-0.04493563	-0.075635451	0.056877203	0.162236118	0.139236714	0.19044884	0.242418256
METTL8	0.061844645	-0.00877298	0.155031985	0.151594587	0.110450682	-0.037136982	-0.21763799	-0.055062777	-0.067689027	0.059611435
SMC6	0.029195384	-0.291681859	0.103751159	0.119462546	0.110376092	-0.000842987	-0.122998156	0.065590991	0.026396096	0.144190848
AGPAT3	-0.037277194	0.09495091	0.360488747	0.353302642	0.326235051	0.526384963	0.570697708	0.391098807	0.586726069	0.296577472
C17orf28	-0.021741716	0.138918596	0.042391416	0.169290971	0.054991689	-0.018003356	-0.108976514	-0.084535981	0.013339359	0.104864775
MRLC2	0.313805415	-0.018096587	-0.200436949	0.129076559	0.106815485	-0.094443494	-0.241365837	-0.033997515	-0.158174857	-0.109693209
TPTE2	-0.006388385	-0.172518986	0.03447946	0.003773666	0.08547269	-0.01245195	-0.102315418	0.160189263	-0.039909048	-0.027845849
ZER1	-0.012057896	-0.068768321	0.353295274	0.298019404	0.164001584	0.215136893	0.288200695	0.181535026	0.397280498	0.398151941
MKNK2	-0.255002944	0.204313581	0.204818488	0.346207463	0.340831441	0.2721755	0.104242345	0.108100926	0.205617136	0.079773048
ATOH8	0.099615522	-0.014829342	0.040335645	0.043691135	-0.110382832	-0.032604596	0.149622762	-0.121384079	0.167379342	0.312971517
NUDT1	0.026158928	0.006069735	0.126989028	0.247865581	0.139345248	0.039811396	-0.039622509	-0.036868769	0.067400508	0.087833266
CX3CL1	-0.235410784	0.018732192	-0.133812018	-0.033769351	-0.029101912	-0.048719443	-0.090904413	-0.01134462	-0.202879168	-0.254376606
ITGA3	0.094406611	-0.219637875	0.068959555	-0.044902575	0.036959055	0.139442517	0.25629089	0.199618768	0.195726768	0.133196591
LRIG2	-0.028738343	0.163911199	0.0134976	-0.041441238	-0.119787321	-0.153301287	0.035093635	-0.112511338	-0.035551008	0.00113821
EGFLAM	-0.23633729	-0.030795269	-0.250022315	-0.581681019	-0.554529871	-0.586366508	-0.342028637	-0.539964178	-0.501149314	-0.23718995
PARD6A	-0.077861709	-0.001129136	0.086523316	0.113401945	0.024480443	-0.034600041	-0.137674163	-0.110872769	0.002455176	0.140816167
BCL2L1	-0.114232337	0.18781815	-0.280217608	-0.173041012	-0.109433752	-0.279424288	-0.37906118	-0.255806822	-0.478213729	-0.429932832
ZDHHC20	0.09970412	0.059711438	0.323321049	0.221954522	0.252668965	0.354199671	0.429163061	0.278714426	0.390738889	0.179274292
COX6C	0.146993551	0.010353777	-0.054465378	0.106021533	-0.018317844	-0.032921095	-0.032923351	-0.097119719	0.129018009	0.270502796
BTBD11	-0.042047728	-0.118238016	0.077290569	-0.115561941	-0.033772748	-0.003805585	0.067755911	0.013984592	0.098487125	0.19339815
SLC45A2	0.140558426	-0.023373376	-0.091175971	0.071240696	-0.035106877	0.06233842	0.030866516	-0.042204261	0.034357549	-0.022413442
GCC2	0.085043541	-0.239715808	-0.196414528	-0.044837288	0.109035996	0.009498095	-0.216356144	0.122886405	-0.243227334	-0.33303381
DNAJC5B	0.085526195	-0.09794718	0.175845255	0.353614913	0.245018319	0.208082515	0.072594854	0.095837011	0.287610922	0.363958018
CD1C	-0.289129345	-0.141437902	0.155764172	0.082010112	0.11905759	0.026987755	-0.092499963	0.042908699	0.027830116	0.083646965
DOK7	0.052972393	0.233269511	0.264041221	0.364201427	0.124768998	0.123927734	0.151272102	-0.039964643	0.316385901	0.377006002
MPP2	-0.086183722	0.007355224	0.022403009	-0.162329865	-0.059352708	-0.094650301	-0.065233702	-0.040034066	-0.031040067	0.088596807
PCDHGA3	0.016603907	-0.057932627	-0.026308978	-0.036983268	-0.178139523	-0.247965871	-0.243633374	-0.193215294	-0.115334721	0.216845032
SIRT6	0.111253152	0.19236556	0.195956737	0.026021274	0.016877729	-0.057600192	-0.101496767	-0.10133384	0.041362625	0.160737659
ZMAT3	0.338066893	-0.158012748	0.359066831	0.419359036	0.438853745	0.696317799	0.734272108	0.622633084	0.675057435	0.178600764
HMGB2	-0.036472988	-0.024704681	-0.214813438	-0.149283442	-0.011287915	-0.149288456	-0.351831091	-0.067732775	-0.371761024	-0.353808587
ADCY9	-0.038669695	0.078997053	-0.043278342	-0.023285707	-0.085724673	-0.066926115	-0.145931715	-0.134465018	-0.151328239	-0.16281466
ELK1	-0.102329444	0.211794638	-0.020062563	-0.155987553	-0.303825595	-0.251630643	-0.059988166	-0.340312536	-0.153231075	0.01586001
PTPN23	-0.017868012	0.167749075	0.106015984	0.095669717	0.116783191	0.248189444	0.198453491	0.177782526	0.119282427	-0.096559719
HAPLN3	-0.136373014	0.02152338	-0.148474001	-0.200142857	-0.067949845	-0.115274578	-0.081622999	-0.012857565	-0.192816455	-0.199499053
ATP1B3	0.076108439	0.267525207	-0.114064321	-0.141142878	-0.097024802	-0.000700663	0.0698008	-0.01687781	-0.081067807	-0.162214088
UBE3A	0.049217085	0.051467235	-0.014412621	0.203762079	0.173064397	0.036406663	-0.11016642	0.018661604	-0.018817241	0.003061948
HEYL	0.047731994	-0.230695037	-0.170495763	-0.022369572	0.068213794	-0.012396296	-0.121694989	0.116732907	-0.188356126	-0.219371978
HOXB4	-0.008588813	0.039764861	0.131405708	0.184288529	0.049927458	-0.038535055	-0.084230415	-0.101630022	0.020729159	0.095241212
ZNF24	0.09309748	-0.002782206	-0.27870266	-0.270353758	-0.019456991	-0.048062983	-0.168400929	0.049397407	-0.332545046	-0.508812442
LOC440742	-0.196115169	0.112006025	-0.115322764	-0.096548126	-0.068048933	-0.153557175	-0.293393279	-0.174405006	-0.210010269	-0.099110558
TESK2	-0.029746016	-0.199345869	0.279376223	0.264772593	0.181689878	0.137822027	0.131403098	0.110630243	0.207016989	0.177510415
ASB13	-0.100874443	0.351443584	0.032009544	-0.071999095	-0.290125981	-0.199863136	-0.005163942	-0.364132463	-0.003156375	0.209723408
C14orf182	-0.022044888	-0.015201272	-0.016336813	-0.14396275	-0.105952251	0.068276333	-0.014358029	0.167855106	-0.020604177	-0.102543818
KHNYN	0.040056605	0.212689992	0.325760195	0.3900598	0.216979848	0.356768382	0.426744102	0.143854365	0.459598944	0.282061135
RGL1	-0.048788139	-0.159133166	-0.203656506	-0.216763139	-0.140028858	-0.262718984	-0.373664369	-0.08706092	-0.420410392	-0.426587749
TRAF7	-0.084882551	0.303989739	0.211823072	0.235460873	0.127133371	0.099853815	-0.010640136	-0.09533325	0.093050785	0.096894888
CCL18	0.155275868	0.063083816	0.073500662	0.287876267	0.278018477	0.237466209	0.252434349	0.055050539	0.263753217	0.168774419
ACSL3	0.145321499	0.081544642	-0.200288482	-0.334875667	-0.321929364	-0.408990557	-0.398451639	-0.231673588	-0.35525621	-0.129228742
PTF1A	0.015612029	-0.064088941	-0.02973068	-0.158975434	-0.056625635	-0.081190339	-0.180407185	0.064339853	-0.182472743	-0.128566258
MPHOSPH9	-0.06778996	0.107851234	0.42765216	0.359053031	0.117376719	0.186108174	0.328357664	0.035236933	0.500841062	0.54506575
ACTN2	-0.02898428	-0.025500978	0.133705598	0.114394109	0.234823431	0.231429078	0.159434117	0.26486253	0.188669315	0.096722273
OAT	-0.022805954	0.280394198	-0.365811808	-0.312241983	-0.303762034	-0.231361373	-0.168086063	-0.344988256	-0.203441702	-0.094921561
TXN2	0.018192504	-0.095723294	-0.022060795	0.061076251	0.020146594	-0.029846813	-0.158837772	-0.066526831	-0.094101251	-0.071104467
FLJ37587	-0.232477685	-0.054128854	-0.044493154	0.061655367	0.10935288	0.016450636	-0.159075442	0.059294254	-0.033331007	0.025331467
SPANXN1	0.207882907	-0.378109808	0.184842734	0.023420456	0.185019929	0.341152589	0.316433618	0.39891705	0.184021834	-0.166738578
PLAC4	-0.101342009	-0.027961751	0.023318145	-0.012261791	-0.0638199	-0.108110407	-0.148144212	-0.16162431	0.03215879	0.241666417
ACRV1	0.066858133	0.003347694	-0.158123434	-0.142251407	-0.067124611	0.100652753	0.190953176	0.104440516	0.051802038	-0.157310457
ZP1	-0.157177942	-0.025373638	0.076619682	0.12838749	0.014639533	0.047051264	-0.025329684	-0.043047111	0.197029398	0.363442581
GML	0.153447769	-0.143777369	-0.2626606	-0.275425396	-0.183897676	-0.08923184	0.016281165	0.039946373	-0.112838696	-0.163814059
UTX	0.169521294	-0.741008551	-0.192798943	-0.2290495	0.049696902	0.006632382	-0.204047252	0.189023181	-0.257130529	-0.336932517
ATAD1	0.265964545	-0.217185798	0.198939037	0.117142125	0.298679578	0.440471333	0.329945447	0.435298625	0.336754532	0.083609725
CLEC7A	0.022091689	-0.105288398	-0.395940174	-0.266506226	-0.132649703	-0.20298132	-0.235705019	-0.021804009	-0.434659386	-0.485520673
TMEM120A	-0.294251134	-0.060777377	0.004582451	-0.134854961	-0.157777291	-0.288028204	-0.380639895	-0.316166283	-0.254567216	0.025174787
NPSR1	0.07917357	0.080504207	-0.014507155	-0.22928656	-0.192176079	-0.158208528	-0.13369431	-0.053679529	-0.160778077	-0.067536842
SEMA6D	-0.179713734	-0.044503729	0.232036188	0.281491028	0.345192546	0.389163551	0.278609941	0.247957195	0.373946	0.204044168
ATP6V1G2	-0.16341112	0.124425476	-0.343078821	-0.06332537	-0.069567971	-0.099799328	-0.034665095	-0.130062403	-0.086331192	-0.027602503
C5orf21	0.184888115	-0.118972139	-0.092829702	-0.274499271	-0.368909049	-0.391033587	-0.325961082	-0.355097752	-0.295195079	-0.027731563
MED6	-0.126128773	0.206270191	-0.184610105	-0.256102439	-0.384839248	-0.306875631	-0.170098275	-0.351431641	-0.262756207	-0.101927722
CPSF1	0.027158176	0.098329541	-0.165595308	-0.111334019	-0.018418617	-0.16841896	-0.298191933	-0.044243692	-0.347769459	-0.353612322
MRPS31	0.051179081	-0.223673141	-0.292723647	-0.162586323	-0.10092465	-0.116936213	-0.222671821	0.029175719	-0.223842	-0.119713848
EFNB1	-0.039612029	-0.019634583	0.261850286	0.121682516	-0.00417739	-0.214190261	-0.213401077	-0.11636044	-0.082835506	0.166703617
HSPA1L	-0.055046164	0.206421906	-0.0292268	-0.265411569	-0.278867037	-0.11658685	-0.140822718	-0.106222785	-0.104435003	0.013181998
TEKT1	0.085730647	0.01605773	-0.123019744	-0.028864002	-0.134525461	-0.18023497	-0.161236029	-0.209887722	-0.054038929	0.145611931
FCHO1	-0.013341411	0.14893209	0.14086936	0.306026739	0.214217614	0.069836225	-0.050411457	0.014243114	0.018082294	0.026089213
CHD1	0.055798885	-0.142152579	-0.474570822	-0.359415434	-0.211901777	-0.426836174	-0.589443119	-0.213333286	-0.622016707	-0.475281988
RASA3	0.090961375	0.065118826	0.150845127	0.206418946	0.143704843	0.109893322	0.043893837	0.029307948	0.053209336	0.012730935
SLC34A2	-0.036215729	0.087172169	0.169099981	0.057201868	0.037347263	-0.053249668	0.059552545	-0.176644705	0.136809659	0.297102752
IQCA1	-0.027135081	0.135416073	0.041290784	0.0725672	0.090990745	0.149786393	0.177643113	0.131853735	0.155944668	0.076688473
ZDHHC22	-0.083183519	-0.167306401	-0.088671546	0.085030436	0.073040224	-0.040499455	-0.13622277	-0.084302233	0.004137788	0.14375194
TIGA1	-0.000680939	0.172998033	-0.394801208	-0.510789641	-0.59732762	-0.509835151	-0.422471828	-0.499587923	-0.492375757	-0.250944352
ZNF589	0.012191071	0.16070156	0.44296483	0.441735159	0.205415887	0.285703112	0.425444268	0.107217722	0.518621448	0.446196102
THRA	-0.019147294	0.210023278	0.166919302	0.256669262	0.175509162	0.157563184	0.097362644	0.069159452	0.151979832	0.058699146
TMEM175	-0.127503343	0.309416727	-0.065804079	0.03572394	-0.070679601	0.029081756	0.076681078	-0.036695556	-0.019566769	-0.115632306
FAM193B	0.103497462	0.203109509	-0.106938332	-0.146263884	-0.171491218	-0.158477815	-0.002641795	-0.09007291	-0.105291442	-0.112497718
RGS7BP	0.00232561	-0.10661075	0.084906629	-0.101383121	0.027418459	0.10294146	0.1271579	0.156625833	0.053492889	-0.114036918
HERC6	-0.050907016	-0.093769552	0.311747021	0.412096137	0.384350415	0.440353487	0.506267383	0.349732125	0.461097396	0.148945986
KLC1	-0.093439274	0.001277386	-0.137531499	-0.026310699	-0.148734989	-0.173272542	-0.117851516	-0.182532678	-0.164178237	-0.081433295
SLMO1	0.042020553	-0.20371071	0.032243766	-0.029977823	0.05002314	-0.088062262	-0.151455176	0.057080332	-0.099996543	-0.080606062
RAD9B	0.217713655	-0.231035109	0.339114322	0.143671595	0.158754941	0.129477585	-0.064222372	0.14134971	0.068083372	0.079660014
MCTP1	0.066286793	0.017028005	-0.061332233	0.019216237	0.0571518	0.241019258	0.309002311	0.149527867	0.169037805	-0.085693866
ZNF197	-0.065682384	-0.131523448	0.09036611	0.223550294	0.2413511	0.255567853	0.271393096	0.200856841	0.330258607	0.209063459
CECR5	0.045968319	0.186563444	0.003257061	-0.044623785	-0.086098646	0.052586496	0.128963276	-0.103877348	0.004396007	-0.095242958
FKBP3	0.033088811	-0.235297411	0.038963347	0.121816463	0.169810851	0.046010031	-0.172865218	0.092588258	-0.011516184	0.036351648
RALGPS2	-0.06567191	-0.067385112	-0.252030158	-0.260212039	-0.30836412	-0.37471331	-0.327827402	-0.236679841	-0.419136751	-0.274628775
C15orf48	-0.23576831	-0.001150627	-0.096852234	0.105189178	0.19850285	0.11667499	0.167410705	0.051908772	0.111790636	0.056806311
ZNF280B	-0.03757803	0.192899143	-0.096452102	-0.214956497	-0.202953539	-0.069759663	0.132087057	-0.045543897	-0.043422361	-0.129530017
GPR157	-0.176808232	0.355437133	-0.014312518	0.052459601	0.093347446	0.133961191	0.058269082	0.049884869	0.046158044	-0.045972371
MPV17L	0.048044915	0.125471362	0.168705234	0.095423862	0.136085024	0.196658686	0.265374057	0.216801521	0.231634254	0.13744218
TRIM32	0.048716963	-0.146349762	0.513395275	0.531635746	0.461070391	0.579954164	0.608560918	0.400221783	0.723728696	0.48104116
GJD4	0.048827144	-0.027330761	-0.090939432	0.048301137	-0.068899074	-0.212312825	-0.229004669	-0.225001754	-0.161717252	0.010878717
CASK	0.23002999	0.098838175	0.377723799	0.332700359	0.232657512	0.314374201	0.391600745	0.180765047	0.331994311	0.117553329
LSP1	0.028036981	0.129100056	0.13822455	0.210063105	0.258662483	0.366795182	0.398279005	0.314974593	0.216115733	-0.079864411
TRIM6	-0.004125373	0.345796686	0.23722263	-0.007279072	-0.074745507	0.138122463	0.310538294	0.057704293	0.319551418	0.291901553
C8orf15	-0.437007604	0.000299064	0.088180144	0.082730143	0.112615178	-0.030607113	0.033929429	-0.025717412	0.047834883	0.141755021
UNC93B1	0.023535743	0.149403403	0.087593964	0.275103964	0.144656181	0.243404793	0.205376071	0.154458721	0.2216636	0.044417571
MGC70863	-0.043721835	0.219972488	0.101381642	0.096106214	-0.068375337	-0.021435452	0.21544052	-0.06126161	0.215023575	0.302636934
FAM134A	0.095220202	-0.320543828	0.17742536	0.255356514	0.255010146	0.318710366	0.224285943	0.257176114	0.341488128	0.271980639
MURC	0.040072349	0.006399567	0.202266669	0.203416387	0.288444549	0.205029745	0.138480623	0.228759663	0.19531181	0.146315934
DCX	0.230701995	-0.299580692	0.227895024	0.332471014	0.423902525	0.317277086	0.246707984	0.340968778	0.266801384	0.151527796
ZNF818	0.046631037	-0.090334621	0.173067608	0.161009674	0.145733889	0.098599036	0.127641936	0.01967871	0.169414081	0.142815315
ACO2	0.099720267	0.027509958	0.209255694	0.315089474	0.320542054	0.523111308	0.522879802	0.423579132	0.475925645	0.195363362
C1orf58	0.23480609	-0.129132638	0.359217976	0.185591288	0.299166765	0.463384867	0.425350089	0.477181051	0.438100095	0.175253449
RANBP2	-0.041251234	-0.169796274	-0.425233258	-0.387020705	-0.223867388	-0.361014417	-0.465515262	-0.197904249	-0.533526292	-0.382573554
CLC	-0.136423225	0.261375559	0.031816197	0.108285976	-0.000971187	0.120180646	0.134683352	-0.016333278	0.116998573	0.000566368
LENG8	0.010796297	0.107027693	-0.099133291	0.029807634	0.102675621	0.219706431	0.287168531	0.253812376	0.132554158	-0.13580298
SCAMP2	-0.049644805	-0.008443735	0.0534109	0.140461542	0.160326437	0.0032217	-0.178088789	-0.009929237	-0.148054395	-0.155198086
CT47A6	-0.019162357	-0.385045119	0.082485566	-0.138620305	0.009209862	0.171387094	0.209953555	0.246115548	0.18334519	0.107421189
KIF7	0.083436281	-0.095837759	0.022013206	0.029571609	0.0783509	0.134084512	0.204669697	0.133540752	0.222401119	0.152991716
HNRPH3	0.195810119	-0.555554322	-0.100451433	-0.171649911	0.033708063	0.010846855	-0.147302812	0.142074104	-0.115933865	-0.136482744
TMED2	0.003454031	0.092063727	0.257696698	0.359110743	0.243164812	0.243496724	0.362041198	0.042918505	0.484951439	0.513253652
NFIC	-0.11591024	0.214791492	0.182067725	0.165114169	0.151221609	0.303241915	0.425417602	0.212680099	0.366660798	0.142374502
DNMT3A	-0.030401869	0.091237961	-0.003375506	-0.036138895	-0.133908707	-0.2088615	-0.095877902	-0.283852814	-0.027742346	0.155181861
ZSCAN18	0.003607142	0.01387626	-0.270505832	-0.097447364	-0.057386597	-0.127129717	-0.265315658	-0.107268427	-0.28291275	-0.278712619
SCARA3	0.01388004	-0.227478863	-0.425917716	-0.502635689	-0.439929869	-0.375455246	-0.430450838	-0.222120955	-0.472309195	-0.316373111
EPHA6	0.011956308	-0.235708389	-0.04363986	0.004515696	-0.018211554	-0.051292561	-0.040056825	-0.028712959	0.032814699	0.118847178
OTOA	-0.043007722	-0.003487582	-0.03610389	-0.103573274	-0.039030025	-0.011560976	0.0251055	0.019821412	-0.000224512	0.016315232
HCG2P7	0.225006141	-0.458086614	-0.19638	-0.189149035	-0.071775335	-0.119839783	-0.207917804	0.121913515	-0.252205175	-0.21631815
P2RX3	0.051034044	-0.072787927	-0.045432398	-0.056410394	-0.1002538	-0.124713256	-0.085803633	-0.171955859	0.075652078	0.277013908
SMEK1	0.031280049	0.139040701	-0.02559381	0.214006993	0.149273053	0.16706717	0.101733473	0.045974017	0.116531774	0.005970988
SLC27A4	-0.001201249	-0.019207275	0.012599821	0.107525478	-0.016536738	-0.15028817	-0.187196343	-0.184390989	-0.031163123	0.156579207
NUTF2	-0.01306882	-0.041918864	-0.118284751	-0.03499086	-0.082916036	-0.199869869	-0.303286512	-0.204463166	-0.202451578	-0.026357471
TRNT1	0.091671577	-0.280027481	-0.326109234	-0.11692724	0.027160993	-0.08299279	-0.295746332	0.044155019	-0.32147412	-0.375837585
TOM1L2	-0.153083572	0.267541605	-0.137042542	-0.160798692	-0.082319146	-0.089698012	0.007588216	-0.114202604	-0.206297856	-0.321320452
PRDM1	0.029282776	-0.209472903	-0.255521536	-0.129163339	-0.00134023	-0.101949972	-0.248966023	-0.028002464	-0.274971666	-0.253360421
ABR	-0.073015768	-0.054895257	0.380652402	0.217565072	0.182123844	0.249902142	0.389629022	0.142333967	0.365742886	0.245925806
WDR19	0.031668385	0.22769019	-0.376800861	-0.251349045	-0.301376868	-0.302795924	-0.224778612	-0.292632428	-0.307484059	-0.183826053
ZCCHC11	0.114857914	-0.078464161	0.406729112	0.241321348	0.204803325	0.291054667	0.318940915	0.268936599	0.375782096	0.266488113
PTBP1	-0.10280415	0.231166106	-0.346682586	-0.371037084	-0.361903643	-0.366217607	-0.248281475	-0.302885197	-0.515733175	-0.531405355
MORN1	0.079130807	0.070136348	-0.258393934	-0.227767836	-0.291613071	-0.308735086	-0.319156592	-0.235867291	-0.299633051	-0.158778562
STK24	-0.191439806	0.313219113	-0.322935936	-0.09228837	0.012663701	-0.114572926	-0.170917932	-0.080706525	-0.349961654	-0.501259327
RNF138	0.020629375	-0.263196703	-0.193013991	-0.103740548	-0.015046005	-0.214968006	-0.366476256	-0.060811341	-0.314799806	-0.148061703
ZNF502	-0.102390243	-0.122130167	0.03245902	-0.03888937	0.014018888	0.112056951	0.20884999	0.093218707	0.247994662	0.248080375
PCDHGC5	-0.073785728	0.188477086	0.092511611	0.037144489	-0.008762182	-0.102902349	0.039163337	-0.161118012	0.063926623	0.203452905
PIK4CA	0.022637435	-0.282318135	-0.274163317	-0.04772407	0.093374941	-0.191878322	-0.442973367	0.007380486	-0.458437175	-0.394623256
CASZ1	-0.097987485	0.332014045	-0.039983974	-0.091934264	-0.106412944	-0.254279733	-0.259848585	-0.259793423	-0.31995619	-0.186668329
PHF17	-0.029398691	0.127249531	-0.18927517	-0.022255162	-0.05531857	-0.131916418	-0.201553647	-0.125661736	-0.214412416	-0.149152986
NFAT5	0.061443966	0.166768835	-0.155943255	0.021093395	-0.142683803	-0.22722824	-0.207386587	-0.217365576	-0.20724285	-0.151102908
C19orf25	-0.015493597	-0.051726393	0.532396956	0.53807581	0.433267937	0.404119821	0.30541332	0.228123932	0.481685152	0.408638309
SLC7A11	-0.033128853	0.012407203	-0.037654526	-0.02498133	-0.016799872	0.03575083	0.202750522	0.035641517	0.122160926	0.069978728
PURG	0.049149533	0.273893013	-0.261681183	0.031176671	-0.097488781	-0.253396552	-0.331623648	-0.179225468	-0.215595759	0.071836538
MDM1	0.033400148	-0.043293252	0.410495357	0.238406579	0.143160932	0.189372307	0.248483887	0.067988441	0.323983283	0.250882854
ERP27	0.008956976	-0.258081856	-0.268711103	0.039563372	0.057188672	-0.031734169	-0.082934958	0.023765204	-0.160295715	-0.210903374
C2orf66	0.050643218	-0.00221741	0.013688975	-0.076145949	-0.040797478	0.096124975	0.241763794	0.074563217	0.117771749	-0.012343431
SLC23A2	-0.123752948	0.315491694	0.052915918	0.098341468	0.088332592	0.021319838	0.048986476	0.030927247	0.003994126	-0.040475064
UTRN	-0.240824727	0.224974475	0.139631273	0.17762651	0.129804929	0.09622436	0.265751157	0.042935795	0.137981728	0.013872946
FAM136A	-0.125263261	0.133809473	0.480507423	0.464455761	0.304443882	0.2609908	0.232562714	0.109263183	0.401072897	0.35828794
HPS5	0.159703192	-0.378110637	0.039968962	0.201937769	0.306571093	0.154278038	0.114773032	0.140196247	0.059995494	-0.066079331
PSMC6	0.016063056	-0.111096582	0.202181442	0.179122065	0.272416519	0.340194202	0.220339635	0.209537568	0.311392499	0.130860891
RIOK2	-0.042347828	0.031406272	-0.421346528	-0.290983614	-0.128294174	-0.114612663	-0.212735177	-0.084863102	-0.324759128	-0.386522511
SPAG11B	-0.021574577	-0.006427331	0.005640125	-0.155199777	-0.146355179	-0.066491648	0.107109853	0.071470722	-0.024028847	-0.027289832
RNF181	-0.058633681	0.119100364	0.242504232	0.122133873	-0.065317422	0.022067746	0.045607003	-0.106652314	0.161223567	0.302735623
PLAC8L1	0.013197028	0.047693293	-0.004359776	-0.058147873	-0.090282107	0.025207838	0.179405823	0.032660604	0.133916773	0.122014982
SCGB1A1	-0.01011653	0.004990357	0.034023094	-0.122030544	-0.016872729	0.052857294	0.106168346	0.11011757	0.057564929	-0.008974339
GPR1	0.092664547	-0.110152207	0.097947032	0.105520964	0.077651797	-0.08493448	-0.071207893	-0.058948608	0.054274997	0.225337558
SELV	-0.016276236	0.026417108	0.000255121	-0.074954687	-0.005134139	0.02540248	0.105767807	0.05425739	0.042111011	0.008986136
MRPS22	0.03587112	-0.031630759	0.122026787	0.110462153	0.045484336	0.037824758	-0.060277877	-0.035091444	0.149908647	0.282431038
DCLRE1B	-0.06744142	-0.020072602	0.200532799	0.267839006	0.222799698	0.167669672	0.149205989	0.078399949	0.109121912	0.00606425
PRDM16	0.20848473	-0.035701832	0.145334536	-0.055638927	-0.029408954	0.057615848	0.113361254	0.023048668	0.143742142	0.155949843
SCARF2	-0.103730193	0.075350412	-0.269080266	0.002055114	-0.048551997	-0.186276008	-0.27101829	-0.134397315	-0.240966264	-0.143115515
TNFSF14	-0.082748044	0.06277449	-0.492997805	-0.361482442	-0.21274066	-0.260753036	-0.285123324	-0.163296515	-0.470900888	-0.457031343
CAPNS1	0.078618825	-0.059344329	0.308074654	0.328663152	0.411890914	0.466797031	0.363014766	0.453403687	0.407346651	0.204286638
RPL17	0.111473636	-0.262602322	0.039864287	-0.000359044	0.01728335	0.150269585	0.116759454	0.072105505	0.202882265	0.151594346
KLK3	0.048233544	-0.157768333	-0.183082243	-0.179132866	-0.043100271	-0.121346371	-0.138160261	-0.076983226	-0.135242987	-0.059179803
TNFAIP1	-0.060564353	0.119968443	-0.151613037	-0.005835129	0.141728215	0.173504506	0.105382952	0.157047138	-0.07214054	-0.363346133
BCKDHB	-0.014346843	0.215803929	0.292484157	0.258926745	0.183053277	0.37193408	0.459738431	0.2005506	0.457199092	0.237257983
XKR6	0.056594546	0.02965517	-0.071230335	-0.17285948	-0.085233837	0.048110664	0.121914377	0.086685104	0.024978301	-0.055792321
OR5R1	-0.116243054	0.085115638	-0.004649012	0.009475782	-0.036303512	-0.043786122	0.107189336	-0.105616441	0.040329084	0.048249176
DSG3	-0.045966445	0.1373608	0.224330966	-0.027714777	-0.095149048	-0.176305799	-0.096121382	-0.15942815	-0.0230456	0.1826486
TSPAN3	0.124149312	0.131539605	0.602909948	0.558274155	0.43806394	0.536793134	0.55381477	0.355317288	0.694311163	0.485062242
RNASE9	-0.022686966	-0.054872999	-0.010807855	-0.022646313	-0.013903164	0.073610683	0.221304582	0.06259564	0.119582839	0.041811725
TRIM27	-0.011123067	0.190121095	-0.144685438	0.05887812	0.006425583	-0.073102663	-0.17189188	-0.157789959	-0.169338139	-0.158186426
C1orf124	0.086894115	-0.309671535	-0.410646273	-0.249594447	-0.078049267	-0.162990028	-0.28278074	-0.049599647	-0.356200167	-0.377024752
EIF4B	0.114203729	0.036053179	-0.159417259	-0.234519013	-0.129090213	0.029560842	0.019164495	0.018190388	-0.008573458	-0.112098859
IFT81	0.037155907	-0.129022685	-0.021755154	0.130527873	0.106185619	0.046356915	-0.095663098	0.012808995	-0.005503322	-0.004609876
ASAH1	-0.05217145	0.161121717	0.352980744	0.239231618	0.118990041	0.255899788	0.408921179	0.10848858	0.455446831	0.376768042
DMRTA1	0.117748003	-0.100576859	0.387362391	0.353828675	0.255640102	0.278783243	0.149678758	0.177587387	0.399968689	0.403752232
FLCN	-0.076418026	0.288676256	0.107984309	0.156738053	-0.091293703	-0.119083871	0.037025885	-0.226113175	0.144844874	0.3182156
ASB6	0.047701426	0.277144019	0.188209739	-0.086080554	-0.141794435	-0.047862476	0.06298256	-0.041431608	0.121164323	0.218879317
ING1	-0.009316326	0.1361357	-0.024762288	0.162281738	0.064408825	0.018828843	-0.043097812	-0.110463199	0.027306981	0.076985246
ZMYND12	0.042512467	-0.037625873	0.27051776	0.191982619	0.062806141	0.044871702	-0.03372044	-0.015815669	0.194441289	0.263923304
SIGLEC10	-0.059193667	0.131039307	-0.115983783	0.011939822	0.07051526	0.101723929	0.164062072	0.079659663	0.013209202	-0.225049227
INTS6	0.124527693	0.062242135	-0.307705212	-0.238317054	-0.162047891	-0.383270482	-0.574264815	-0.258358151	-0.515046573	-0.326982478
ARPC3	0.09584587	0.053230722	0.207988088	0.292328922	0.299418877	0.473855139	0.459635493	0.316819232	0.486792889	0.217398313
KIAA0427	0.089756731	-0.300483517	0.087408822	0.110839022	0.145578917	0.142811184	-0.031134552	0.224676165	0.048414765	0.020541246
UGT3A2	-0.13025469	0.308344219	0.589149262	0.306276489	0.13547628	0.221859392	0.317958671	0.044842635	0.454741374	0.489397271
C6orf59	-0.044544314	0.06156297	-0.098497798	-0.162705255	-0.139109271	-0.03355904	0.054653829	-0.016139914	-0.041267448	-0.052753379
TIAM1	-0.077685964	0.07705978	0.142599508	-0.100851007	-0.161556945	-0.158356878	-0.074343275	-0.196979274	-0.145971126	-0.028787921
SERPINE2	0.051129903	-0.007231211	0.146686459	0.116278126	0.081626681	0.042101103	0.059127528	0.079696154	0.011846149	-0.074920211
KLHL18	0.051019884	-0.027044399	-0.142611367	0.004481252	0.115140822	-0.031458918	-0.283257499	-0.003870709	-0.267794548	-0.32161875
RET	-0.000539109	-0.258903337	0.530596077	0.497402062	0.5508612	0.464510364	0.295252484	0.405678741	0.437978472	0.290475051
TSHZ2	0.158412879	0.340113743	0.222700475	0.193027793	0.143461909	0.339108906	0.399391664	0.24010822	0.290092516	0.005241789
ARRDC2	0.12900176	-0.10380794	0.094789614	0.074737552	0.173521037	0.008874113	-0.186820998	0.09829197	-0.15942595	-0.223283028
DSP	0.023628298	0.038266226	-0.110001321	-0.200032571	-0.060194663	-0.146901087	-0.252855189	0.003820628	-0.336611241	-0.308767926
PRKRIR	-0.06016702	-0.068215925	-0.214896714	-0.190528918	-0.119641508	-0.272379568	-0.366780152	-0.234113483	-0.371956899	-0.273627034
GPATCH1	0.003199403	-0.027959937	-0.019949266	0.097024503	0.008387131	-0.081297673	-0.153452474	-0.128372488	-0.08078137	-0.024256658
METTL3	0.165558675	0.0096359	0.155878817	0.115563549	0.0893624	0.134159826	0.0624189	0.042642787	0.172392308	0.070161878
UPK1A	0.025196718	0.097442766	0.133612429	0.00532766	0.036798659	0.050656697	0.081718956	0.098029997	0.152534486	0.204370352
FANCI	0.006634891	-0.088772013	0.328058434	0.405115554	0.285983413	0.282946649	0.241658854	0.159078286	0.258969508	0.112584422
ZNF804A	-0.104060238	-0.010858771	-0.014331824	-0.01333188	-0.051513481	-0.050062652	0.14141476	-0.062869295	0.12440838	0.24090254
AK2	0.130880889	0.353148455	-0.135167101	-0.216034857	-0.252631678	-0.151814383	-0.045730935	-0.199868329	-0.216348412	-0.287857981
MPDU1	-0.091230901	0.081882742	0.002374397	-0.090566095	-0.131204988	-0.310936142	-0.425810439	-0.274555876	-0.292017005	-0.031852245
SC65	-0.066245069	0.195800217	0.384978726	0.35384793	0.20545453	0.243380995	0.263195705	0.098709669	0.419074773	0.456494968
DGKD	0.110407102	-0.118164696	0.238837757	-0.018887109	-0.027176781	0.165276084	0.17304478	0.188293035	0.292083012	0.276333735
SARS2	-0.504088015	0.251815739	0.167056558	0.130014451	0.025136724	0.046635882	0.216749273	-0.113912404	0.132750648	0.070142353
CDR1	0.199908346	-0.531957844	-0.073279661	-0.026092428	0.135083769	0.126034976	-0.009599511	0.262871491	0.012376966	-0.022132155
ABHD5	-0.055227305	-0.064400565	-0.348267395	-0.201635138	0.02931942	0.086942705	-0.077961	0.12983739	-0.248214564	-0.475579484
PRLHR	0.066101531	-0.041783194	0.037868988	-0.124059266	-0.02728902	0.074510126	0.146864024	0.100937683	0.080283485	-0.008021855
OR2M7	-0.104797694	0.209025939	0.110412636	0.073401241	-0.084857644	-0.171301636	-0.046852854	-0.241556164	0.048047736	0.248161127
CNNM4	0.197973273	0.125701752	0.250128401	0.214079008	0.064824791	0.27270345	0.445257967	0.10475369	0.387115623	0.233464696
BCL2L15	0.260073981	-0.012195895	-0.028993879	-0.035193503	0.013712085	0.030173839	0.045595358	0.131130162	-0.004357273	-0.009050315
RFC2	0.073065047	-0.283139198	0.081149858	0.164615294	0.305604254	0.24847518	-0.001949951	0.293166444	0.116708064	0.008137787
RPF1	0.105438898	-0.272341415	-0.242046185	-0.128201451	0.030252425	-0.028087757	-0.284837191	0.037612584	-0.209455839	-0.213133329
SNAI2	0.177546702	0.089485806	0.30623969	0.267922881	0.188953718	0.347633493	0.409678353	0.204322759	0.445358834	0.227950519
ZNF323	-0.010326879	-0.289910454	0.064542088	-0.071069524	-0.031263069	-0.105296224	-0.198864404	0.037855467	-0.184974598	-0.144670458
MRPS21	0.018951856	0.087319155	0.300571375	0.286049481	0.082968823	0.178917524	0.211675776	0.017340268	0.398867129	0.483424109
ANKRD34B	-0.098879993	-0.291370915	-0.286496142	-0.357983276	-0.219163098	-0.213938056	-0.191241181	0.029843558	-0.312206119	-0.260086306
METTL10	0.104355954	-0.377449666	0.028860184	0.032099394	0.12449569	0.033022623	-0.194030336	0.115187829	-0.070912703	-0.036107966
ZNF780A	0.104979975	-0.032648735	0.317958891	0.337488799	0.23175822	0.365773109	0.408610156	0.230397019	0.546127002	0.408887233
44258	-0.02291942	0.02837369	-0.29647969	-0.330626963	-0.135043968	-0.236741238	-0.268524461	-0.137703739	-0.399721126	-0.351677951
SF3A1	-0.169663423	0.290609573	0.066837025	0.114790025	-0.016532294	-0.026237859	-0.014229947	-0.123138297	-0.003111674	0.018769742
CAPG	0.111727154	-0.039700646	0.243950334	0.32714942	0.2666715	0.12151095	0.001311013	0.060106451	0.14884852	0.242999153
COPS2	0.098646976	-0.24057487	0.037651885	0.166530219	0.245722185	0.208436453	0.106077603	0.138231555	0.24181272	0.231509508
TAF1A	0.091334531	0.045532119	0.036655747	0.043371401	0.10362168	0.156648212	0.165362695	0.130158031	0.197126427	0.086467253
GSC	-0.240061288	0.228821562	0.064011752	0.146147614	-0.009805229	-0.11998575	0.124946856	-0.271092656	0.09900349	0.167436134
HRASLS	-0.002888763	0.132581773	0.155098493	0.209088328	0.097667291	-0.037389004	-0.149851022	-0.053887139	0.003844792	0.127965026
TMEM159	0.068362249	0.012954981	0.110027836	0.05563428	-0.067152788	-0.129638074	-0.100826088	-0.165990676	-0.023050966	0.169681721
CHST11	-0.077165389	-0.032099998	-0.068567385	0.175765746	0.09007526	-0.08750224	-0.142639666	-0.169356505	0.000261315	0.222815359
ATP2A2	-0.01854518	0.189191968	0.043860982	0.012111085	0.088425368	0.222541423	0.241056818	0.213797957	0.086433724	-0.147420035
MMGT1	0.06508153	-0.570884076	0.072690559	-0.088944004	0.105429428	0.190066372	0.16164068	0.298028735	0.129586962	-0.023853677
C9orf93	-0.007530456	0.259906429	0.110029524	-0.030918262	-0.092847672	0.010010912	0.157177459	-0.03108434	0.120989319	0.09493512
MYL1	0.041434091	-0.086512754	0.064970442	0.249397131	0.159140246	-0.093839171	-0.177938976	-0.066162075	0.018750421	0.26686301
ROR1	-0.064858507	0.003819153	0.032724298	0.09622671	0.084753973	-0.075353871	-0.203457242	-0.043201817	-0.144465062	-0.056786268
FBXW7	0.123599442	0.057142529	0.142293903	-0.012436253	-0.136693608	-0.213806225	-0.214465732	-0.15290724	-0.121179836	0.067551078
NUCB2	0.154315048	-0.068370336	0.338280322	0.417886527	0.415960757	0.321315476	0.273059023	0.265562955	0.425274137	0.38706633
MMP11	0.148129389	-0.226255293	0.108862144	0.150618873	0.097567962	0.080366984	0.092844406	0.07285539	0.149386901	0.111495973
GTF2E1	-0.047202911	-0.034514163	0.466251961	0.503868258	0.440349608	0.467045177	0.480534981	0.301151243	0.621006067	0.457001228
ELL2	-0.028023914	0.163405302	-0.466143844	-0.390575208	-0.333715272	-0.428370278	-0.279730377	-0.391878405	-0.436109742	-0.240810639
RPE	0.168016082	-0.227299476	-0.008645821	-0.114194422	-0.124704378	-0.093728601	-0.042742961	-0.082588365	0.025650579	0.142532531
ADCY7	-0.064454738	0.096422304	0.213238234	0.454759236	0.390231662	0.434713312	0.298752476	0.288788617	0.350249512	0.070346754
ZHX1	-0.003468947	0.057455529	-0.009155233	0.117670826	0.013206601	-0.062660631	-0.106978284	-0.147925159	-0.027421718	0.051417166
LRRIQ1	0.039797115	0.091120725	0.046463547	0.011611187	-0.090204138	-0.126240247	0.041601823	-0.114457562	-0.008919476	0.013214929
C7orf54	-0.10099555	0.10279828	-0.230985188	-0.292941296	-0.262743793	-0.283530765	-0.090842118	-0.165881811	-0.256256369	-0.248061449
PDE6B	0.074663851	0.003064352	0.058063542	-0.031902512	-0.068227104	0.011999692	0.141014022	-0.033615804	0.157429729	0.150478894
CDC14A	-0.045429793	-0.12947951	-0.136849975	-0.179219034	-0.140702525	-0.163764571	-0.049096028	-0.063800597	-0.092034007	-0.024913294
GALNT10	-0.147849238	0.101274359	-0.231679076	-0.013802336	-0.073818385	-0.07362252	-0.121753369	-0.108491449	-0.066807129	-0.013558074
STAB1	-0.006795527	0.218485564	0.012252153	-0.121095872	-0.094792376	-0.321733068	-0.43169982	-0.270742274	-0.352006288	-0.171491502
CDK5RAP2	-0.056698631	0.187047083	0.417385235	0.398245519	0.204438455	0.315481901	0.441159914	0.185877214	0.461349903	0.312568157
RGS1	0.042715433	-0.011248904	-0.39759466	-0.412866474	-0.254638467	-0.277695917	-0.277279385	-0.123788982	-0.484296311	-0.483741099
DHX9	0.110443088	0.130085148	0.036446307	0.04528967	0.163122513	0.2477947	0.215795032	0.216433868	0.128244869	-0.130959045
NRF1	0.160972536	-0.028947608	-0.043283383	0.006271541	-0.011384595	-0.190379473	-0.400151144	-0.101420654	-0.298163593	-0.140914606
NTN3	0.09565399	0.058033063	0.137865289	0.189820776	0.080875105	0.043956771	0.000430277	-0.041993943	0.082933201	0.107603312
KIAA0319L	0.019881573	0.170095499	0.20681094	0.24720152	0.270341685	0.455949855	0.491415026	0.358369629	0.403552245	0.08194528
BRUNOL6	0.113204644	-0.054410754	-0.177799191	0.007692841	-0.111252151	-0.207528325	-0.173692388	-0.138638481	-0.153403705	-0.029297608
KRTAP19-4	-0.082011081	0.072679623	-0.04116092	-0.253474091	-0.223376408	-0.111485135	0.196423481	-0.086729511	0.025087575	0.023760572
PLAU	-0.052202906	-0.032013752	-0.162094325	-0.043424576	0.167531886	0.058895181	-0.025791816	0.106210062	-0.202858346	-0.405664931
TNPO2	0.020332142	-0.052412396	-0.065950856	0.045236126	0.091826799	-0.040644501	-0.209134233	0.060880651	-0.207660238	-0.225288503
C17orf55	0.082201614	0.254393086	0.136466525	-0.060775865	-0.15581601	-0.146354368	-0.032739042	-0.206822839	0.042375559	0.16749588
KCNQ1	0.077953107	0.347031915	0.008441509	0.214264097	0.079792225	0.016092253	0.074026228	-0.079909297	0.043620819	-0.011507743
C1orf110	0.041220719	0.019270104	-0.040712376	-0.26129444	-0.218325384	-0.116951038	0.006896941	-0.047876673	-0.102451571	-0.155569215
SLCO1A2	0.116993688	-0.105522633	-0.355856874	-0.559771744	-0.437850321	-0.301898378	-0.258396674	-0.151221354	-0.322965854	-0.184619073
MYLIP	-0.235241943	0.322289561	0.016339363	0.087840361	0.103631083	0.077797398	0.072768685	0.040531333	0.008851741	-0.126855136
ZBTB7A	0.04684035	0.172686708	0.119397455	0.159548328	0.181194646	0.250228354	0.189057576	0.193689671	0.160832016	-0.018743163
SLC39A10	-0.040206734	-0.033175958	0.105295419	0.294505195	0.287992632	0.177208988	0.042499224	0.087066738	0.163182573	0.163981246
PNLDC1	-0.080707819	0.142238387	-0.205376604	0.137687746	0.042701796	-0.152605282	-0.217492487	-0.115970179	-0.197711915	-0.063345458
CNOT7	-0.051101842	-0.020252836	0.255032339	0.294311998	0.250924349	0.276292143	0.249159271	0.012300425	0.449008307	0.483518518
STAU1	-0.100289104	0.212794743	-0.05108341	-0.015948162	0.082443837	0.08865624	0.149282993	-0.058820159	0.0308802	-0.087111549
MAPKAPK2	-0.020793416	0.419611342	-0.169756173	-0.0907652	-0.165925341	-0.134065078	0.009395276	-0.152747042	-0.1268247	-0.174966307
GOT1	-0.23319894	0.170202047	-0.420322024	-0.195873756	-0.031154259	-0.171893919	-0.244543542	-0.20234124	-0.373135819	-0.304096524
ATP10D	-0.081620572	-0.116605396	0.032533931	0.094873586	0.130320985	0.07793161	0.134167876	0.050571216	0.178907305	0.191395143
USP9X	0.062534377	-0.25463	-0.4527283	-0.437670689	-0.318639813	-0.419521409	-0.556575113	-0.248716834	-0.578380675	-0.374796944
ADAMTS19	0.036504717	-0.252018987	-0.055460073	-0.084561387	0.027380745	0.129374577	0.184449683	0.132773122	0.112257926	-0.030101568
DEF8	-0.116829631	0.106691784	0.043197488	0.065634065	-0.081722012	-0.11267394	-0.004193229	-0.259027764	0.061096277	0.238431833
SLC41A1	-0.067168028	-0.199198305	-0.12202822	0.060985218	0.204170862	0.178835436	-0.021643348	0.222304114	-0.1006534	-0.323155792
MGC19604	0.134599399	0.062026728	0.015557444	0.02390051	0.016807777	0.054415243	0.0856836	0.122032024	0.071915705	0.031812828
ZNF704	0.042863916	0.166243717	0.060406348	0.078819908	0.005398723	-0.02700813	-0.055880709	-0.03083468	-0.094127815	-0.117243789
MGC33407	0.118566506	-0.066672266	0.116291589	-0.021132457	0.072313749	0.11936818	0.15455781	0.171323894	0.135969383	0.068659265
TSPAN10	-0.041542327	-0.08513476	0.169510805	0.032317389	0.048364469	0.126477831	0.03308977	0.072178898	0.161827632	0.156786655
E2F6	-0.120814024	0.032232009	-0.337071162	-0.194897749	-0.109040784	-0.055579159	0.057610458	-0.003785187	-0.136054141	-0.242230239
KATNAL2	-0.024953709	-0.034112435	-0.211555851	-0.235493641	-0.245989752	-0.287734805	-0.405607323	-0.24697046	-0.372609247	-0.206049857
OR2T27	0.079321185	-0.095320402	0.021910212	-0.050101232	0.013651465	0.056010511	0.140487237	0.141650491	0.107223025	0.073694074
DUPD1	0.033488257	-0.083998575	0.155130336	-0.118252947	-0.023925951	0.076277977	0.18200804	0.089673046	0.153997725	0.12802856
ASAM	-0.000912184	-0.150820637	-0.288438991	0.002090151	0.105138226	0.105264946	0.002375939	0.227532416	-0.083819085	-0.282148022
PRPF38A	0.185748848	-0.098474782	-0.086581078	-0.073161095	-0.03018052	-0.125369711	-0.250481507	-0.116058597	-0.148275253	-0.091525309
METTL7A	0.175853341	-0.369518329	-0.178908268	-0.035653746	0.03563154	0.035116356	0.036018542	0.131062625	0.041107731	0.082445594
SPOCK2	0.292450025	-0.151875582	0.145829093	0.265423869	0.279043383	0.286154645	0.141035916	0.334553188	0.168929529	-0.03264902
TSKS	0.032821236	-0.054891322	0.111942742	-0.087953338	-0.002612672	0.008511209	0.019970861	0.047156112	0.112058851	0.187204315
GOSR2	-0.062928302	0.372922244	0.166930887	0.221829691	0.050044963	0.208694569	0.362346421	0.00092446	0.35516235	0.283043144
C21orf57	0.041505892	0.00238108	-0.073799524	0.02196345	-0.071000613	-0.208632556	-0.296324806	-0.245134199	-0.217827401	-0.058494756
GFRA2	-0.012988413	-0.136630773	-0.162167649	-0.103966187	-0.088963999	-0.229573385	-0.407190056	-0.127498245	-0.354355301	-0.25826386
SNORD28	0.054987443	-0.171708688	-0.402365181	-0.315714435	-0.30234644	-0.469784159	-0.558265534	-0.321811781	-0.547325233	-0.313527249
INDO	-0.09686083	0.209504899	0.07652283	0.026933037	-0.124519275	-0.105523039	0.058556358	-0.231926493	0.034800457	0.094811471
ZMYM3	0.110649105	0.126861041	0.108734322	0.233355551	0.059771871	-0.01705637	-0.072144188	-0.030060767	0.071761705	0.20173536
LTBP1	-0.048852788	0.179719687	0.200252192	0.276285033	0.103277607	0.033945931	0.178449054	-0.053373028	0.115543778	0.100310912
GLT1D1	0.152311825	-0.158456138	-0.131747469	-0.115882689	-0.061308748	-0.078255165	-0.266277822	-0.084958541	-0.188916258	-0.142816202
CCKAR	-0.18408276	0.078115981	-0.054626122	-0.229533795	-0.139352155	-0.118985517	0.012315975	-0.147279052	-0.067392403	-0.014428666
RIT1	0.021042861	0.295583057	0.299348007	0.313387433	0.162322283	0.161898074	0.22220911	0.02489753	0.304334349	0.252106417
PTPRS	-0.066283051	-0.001476578	-0.141027974	-0.113349091	-0.12811481	-0.193615104	-0.311674512	-0.14370156	-0.292650083	-0.18941404
FBXO48	-0.105778178	0.10282146	0.499074398	0.432763643	0.363640378	0.422477703	0.405039046	0.284896778	0.515607334	0.366873713
LOC201175	0.02217058	0.199134631	0.049232823	0.203883072	0.078772202	0.057978314	0.233080957	-0.047504545	0.19378697	0.159281328
ASB12	-0.059422496	-0.368251031	0.111549757	-0.091625318	-0.022412431	0.057329058	0.010020976	0.080756852	0.131323177	0.29446896
ALDH4A1	0.265854834	-0.01243318	0.139073225	0.244910587	0.181098364	0.125912156	0.104510275	0.178744964	0.175430408	0.13592581
C8orf4	-0.201113743	0.247674282	-0.394744133	-0.277521999	-0.156954882	-0.268673785	-0.261579605	-0.191753528	-0.481687542	-0.554729751
TRPA1	-0.028045011	-0.078438377	-0.060506686	-0.100365398	-0.062210742	0.073760966	0.200204209	0.060036169	0.080276258	-0.017740855
PES1	0.026542173	-0.063637228	-0.194672142	-0.063771022	-0.063785097	-0.155893222	-0.294980936	-0.125155872	-0.291058645	-0.247220679
BNC2	0.096029748	-0.49629532	-0.246017457	-0.149346635	0.027265048	-0.033547743	-0.232313072	0.140266756	-0.24619384	-0.332246198
NMT2	-0.080247063	0.105617183	-0.086648633	-0.031955528	-0.132812043	-0.187996625	-0.261227483	-0.238962535	-0.224476501	-0.108556373
SOHLH1	0.078499303	-0.110191889	0.049032077	-0.245082711	-0.116387431	-0.040165063	-0.105198907	0.142811337	-0.1341338	-0.183558483
SEC24D	-0.057866494	0.030646153	0.19967948	0.200842884	0.234992758	0.207742102	0.195262187	0.124641109	0.23317797	0.165313094
MYOT	-0.090854931	-0.110302572	-0.258985917	-0.209880459	-0.023383816	-0.157003636	-0.32949116	-0.006967807	-0.347786897	-0.281557731
TCEAL8	0.046541594	-0.309972284	0.02521533	0.081145368	0.105914149	0.023125072	-0.146425024	0.084447038	-0.017126283	0.03938767
STON1-GTF2A1L	0.071020864	-0.155570893	-0.299076225	-0.325151992	-0.25555897	-0.152352058	-0.11160357	-0.035214523	-0.290440285	-0.31595249
TRPC6	-0.056114344	-0.226531867	0.004753483	-0.122438467	-0.129805205	-0.021497171	0.077210311	-0.011184779	0.054961981	0.142175612
ZMPSTE24	0.167983562	-0.140426266	-0.12806713	0.041348059	0.023651197	-0.11701938	-0.192140879	-0.063280101	-0.108562903	-0.012453091
RAB11FIP1	0.072275663	0.003107086	0.016111388	-0.122581529	-0.029792368	-0.114861027	-0.103275479	0.009309822	-0.084164186	0.031263469
MGC3020	-0.24422246	0.204030637	-0.008723523	-0.072265295	-0.182805791	-0.199743793	0.039614557	-0.211946681	-0.003268223	0.146074995
GPR87	0.01274115	-0.014497505	0.353746022	-0.115804082	-0.096696704	-0.113622859	-0.128836516	-0.075299875	0.008622298	0.233962438
IP6K1	-0.251683851	0.286581202	0.199566428	0.059563309	-0.038685086	0.093341534	0.255385467	0.047778286	0.244514289	0.265389751
RBMS1	-0.12745586	-0.005655732	-0.316932532	-0.363482855	-0.349693599	-0.398905956	-0.248586572	-0.252712592	-0.455705159	-0.363400129
C16orf59	0.0215426	0.100989544	0.162943541	0.353171523	0.266113879	0.326302661	0.380889315	0.171199076	0.367440279	0.167275628
C11orf73	0.031678934	-0.266333187	0.213161818	0.220386162	0.237472722	0.165407981	-0.05348313	0.13112898	0.196716269	0.267093107
ARSA	-0.330403246	0.038459608	0.052928277	0.171083836	0.098079901	0.269834902	0.344034833	0.203734627	0.319151239	0.134900032
OSBPL2	0.017486279	0.037590952	0.194058204	0.171971008	0.070958394	0.012476706	-0.002115507	-0.024963229	0.045011404	0.104041222
DNAJC10	0.08347199	-0.140474762	-0.070252494	0.134347844	0.295702346	0.35059862	0.227610605	0.339276106	0.194288788	-0.072264121
FGA	0.03287737	0.034004319	-0.457338891	-0.3054417	-0.152892128	-0.299105882	-0.382483852	-0.162632888	-0.490745206	-0.413337159
EPC2	0.01520379	-0.125184548	-0.095859931	0.048627409	0.015974285	-0.148574205	-0.248423247	-0.078826882	-0.166206387	-0.045437794
DUSP5	-0.025668838	-0.00862066	-0.501293119	-0.500779944	-0.328558291	-0.519459061	-0.62371542	-0.325086702	-0.751539717	-0.574104825
ZNF304	0.042099574	-0.035440626	-0.077133364	0.076215367	-0.004121643	-0.080287854	-0.173559393	-0.127822803	-0.09901012	-0.042587921
CGI-96	-0.053341893	0.205430759	0.150144538	0.036461169	-0.096884636	0.085429838	0.230579403	-0.009159261	0.19553022	0.170050457
SNRPN	0.163232172	0.023893779	0.123562745	0.106410923	0.033806412	0.131895074	-0.016289815	0.07551727	0.193412493	0.20581982
RUVBL1	0.108669098	-0.008122739	0.028415097	-0.018227786	-0.033132557	-0.028877815	-0.152901139	-0.075151647	-0.109721177	-0.101549127
ARHGEF11	0.042243381	0.148299268	0.283077012	0.213361213	0.199874737	0.411668174	0.407606451	0.313184325	0.34092042	0.048862996
ARMC8	0.065613917	-0.074091253	-0.062427657	0.093361915	0.121951225	0.020600136	-0.166231577	0.045825678	-0.042728335	-0.027556126
PARM1	-0.014142588	-0.19070554	-0.265568328	-0.304063513	-0.21577368	-0.266094707	-0.247648654	-0.133343925	-0.391742189	-0.375814109
PAX8	0.130997299	0.07291337	0.12350385	-0.103691131	-0.079142956	-0.166442073	-0.022966077	-0.076188284	-0.112941388	-0.063618414
PCGF6	-0.034359738	0.129402647	-0.188520581	-0.134539633	-0.14143799	-0.250062255	-0.29776113	-0.273694315	-0.312471399	-0.25458767
ATCAY	-0.021842076	0.026399262	0.054807188	-0.068170275	-0.026783375	-0.012741749	0.116358497	-0.004800669	0.073462954	0.117170947
KCNH7	0.021359006	-0.078526049	0.0844645	0.126078196	0.158162881	0.06609485	0.034596134	0.047147006	0.068966017	0.058945413
AK5	-0.146709938	-0.020208084	-0.004909403	0.056910668	0.140454013	0.261157558	0.270600367	0.229206519	0.266081587	0.11361942
STAC3	-0.054357092	0.175089074	0.099806728	0.250118652	0.184022074	0.155640404	0.047051791	0.037740536	0.186290576	0.234763431
LOC387856	0.029831501	-0.041720488	0.03241883	-0.102562355	-0.019897676	0.077949371	0.156188058	0.155008828	0.062470749	-0.041194389
CHMP2A	-0.102366124	0.218193131	0.365619993	0.392461853	0.308790897	0.310770918	0.267528369	0.122391969	0.396562558	0.349527903
RPS24	0.052099778	0.034496966	-0.24725257	-0.253767351	-0.360409898	-0.368727045	-0.311744753	-0.365837796	-0.24487552	0.032196909
WDR4	-0.102339305	0.113088971	-0.369465141	-0.236856475	-0.230512429	-0.298845709	-0.203787467	-0.277184942	-0.342442558	-0.282641841
BHMT	0.343713619	0.082005099	0.106285641	-0.003227419	-0.106332616	-0.008590158	0.075387397	0.019402871	0.069283276	0.073060373
COX19	0.029452568	0.061633661	-0.011519645	0.092012319	-0.035319838	-0.130544152	-0.177646066	-0.158887007	-0.084718245	0.027740003
HLA-G	-0.027351501	-0.069591754	-0.038970399	-0.143533512	-0.029106449	0.051921483	0.116502062	0.131259719	0.037460929	-0.021657068
ZYG11B	0.034872239	0.112044413	-0.063847524	-0.101579965	-0.15213133	-0.097351114	-0.039697575	-0.038492332	-0.070555093	-0.013592642
AZIN1	-0.01630573	-0.127394043	-0.053217191	-0.167209704	-0.036245911	0.009073354	-0.032271867	0.029641397	-0.106873524	-0.148017266
CCR3	0.088253818	-0.290007571	0.012937476	-0.006880323	0.012804401	-0.081397359	-0.086890518	0.063096777	-0.016962597	0.08309346
FBXO4	-0.034760386	0.040947897	-0.073117006	0.034188784	-0.04935009	-0.063018626	0.015274927	-0.239631118	0.064391053	0.154549275
LCE2D	-0.018002499	0.065976329	0.215248164	-0.096599699	-0.177085102	-0.298545586	-0.268120085	-0.286714087	-0.11544406	0.265989061
OR14A16	-0.054443272	-0.404313604	0.159172709	-0.004682602	0.066443646	0.226506082	0.340426237	0.210532378	0.266519303	0.139646196
MIA2	0.070622507	0.024265395	0.205639918	0.127681972	0.205368392	0.343447781	0.326910801	0.354092482	0.279986632	0.028880461
TGIF1	0.065018619	0.09867163	-0.161460593	0.099098975	-0.024498789	-0.142208283	-0.205407984	-0.194991239	-0.116222272	-0.01242467
FLYWCH1	-0.213891489	0.209926013	0.368246107	0.494891391	0.262156492	0.20129681	0.339295716	0.074444752	0.437642405	0.448744428
TIMM17A	-0.043626042	-0.004770494	-0.084484088	-0.039787811	-0.063877638	-0.105291258	-0.185863071	-0.197941318	-0.128383521	-0.032729245
LOXL2	-0.009830979	0.049600015	0.07356236	0.026941142	0.056958116	0.132759406	0.191433921	0.106908953	0.196825276	0.155323704
RPL27	-0.027932724	-0.076940583	-0.034422492	0.025877372	-0.097588353	-0.194018246	-0.020972888	-0.286937654	0.05136378	0.287984386
ITGB1BP3	0.009477204	0.1290188	0.037681364	-0.234881397	-0.171061676	-0.109645579	-0.016244361	-0.057574709	-0.044860437	0.02465444
GPR141	0.022444513	0.185414687	-0.136790219	0.00287429	-0.017234917	0.059118645	0.272789694	-0.022769761	0.072568079	-0.053690031
DNM2	-0.271250162	0.532368502	0.052766037	0.142701017	0.055063913	-0.07022628	0.057874869	-0.111201618	0.008737661	0.03639571
SH3RF1	-0.091419402	0.277049637	-0.06804947	-0.172490995	-0.282338793	-0.354641469	-0.320918263	-0.392767559	-0.369063038	-0.208251168
RBP1	-0.080932065	-0.09536061	0.083551834	0.081930045	0.003915784	0.04319156	0.040369157	0.016108077	0.039814368	0.03808452
VPS13D	-0.21286139	0.109446461	0.084759951	0.041435303	-0.010858503	-0.047728716	-0.150500924	-0.110664127	-0.113320361	-0.099062882
GBA2	-0.076270236	0.226393157	-0.003726546	0.24839729	0.137860784	0.004247966	0.011384777	-0.164779456	0.076274081	0.184538325
SLC26A8	-0.037758379	0.033781605	-0.084206826	-0.176145811	-0.07576615	0.013876823	0.107756128	0.059009748	-0.029940933	-0.137523804
LIN37	0.077315602	0.14837116	0.061706029	0.048411877	-0.091971926	-0.112245898	-0.132237052	-0.22110713	-0.045339164	0.094702698
HECTD3	0.091360926	0.128493071	-0.029337775	-0.025629829	0.073277953	0.07984358	0.01705508	0.151319272	-0.099679994	-0.271002606
SLC1A4	-0.228969057	0.406466269	-0.088538547	-0.071572941	-0.084753705	-0.196319181	-0.11997066	-0.277144525	-0.272670478	-0.285639626
MDH1	0.142831179	0.036057431	0.341139209	0.541507078	0.386449764	0.425322186	0.477660299	0.245207146	0.614655624	0.509817416
PSD3	0.334650448	0.16318583	0.037887366	-0.074242661	-0.136321668	0.015722459	0.083743822	0.068056514	0.00191977	-0.116459287
CRIP1	0.027299936	-0.056641871	-0.260342758	-0.232738978	-0.179606244	-0.313963104	-0.396969094	-0.223126963	-0.478489239	-0.376178732
SEMA5A	0.027007416	0.094923609	-0.080755203	-0.081621589	-0.17417229	-0.127586283	-0.026147935	-0.175912215	-0.059223466	-0.084960094
REPS2	-0.044122004	-0.001720714	0.323086652	0.30920888	0.157954216	0.157498336	0.197827646	0.144715976	0.333057677	0.383211023
LOC731486	-0.018499072	0.203869625	0.284962426	0.399664741	0.229434838	0.244878814	0.412468853	0.119958254	0.314293563	0.126047741
ABLIM3	-0.033064026	0.008025144	-0.478124393	-0.215337926	-0.053335506	-0.188947168	-0.232439629	-0.171864539	-0.375945592	-0.406909864
PRICKLE3	0.055470022	-0.359373853	0.21703232	0.085322629	0.23186548	0.162243433	-0.014013134	0.209060899	0.153073675	0.203552493
APCDD1	0.121147004	0.317844057	0.190360168	0.018113647	-0.085963292	-0.123114538	-0.085650738	-0.105775867	-0.040630804	0.056927775
PCDHGC3	-0.201013804	0.203559755	0.051099473	0.022877276	-0.085236438	-0.14865722	-0.146609737	-0.172142873	-0.123976346	-0.054502199
HIBCH	-0.055332507	0.085615545	0.3903389	0.535735062	0.421865509	0.306102235	0.341328424	0.164644206	0.542705777	0.587920577
ABO	0.046053261	0.025500712	0.075003524	0.049411931	0.052544892	-0.001600588	0.016005246	0.07981349	0.09810041	0.183773332
NLRP10	0.088933528	-0.042024819	0.271537645	0.035303124	0.053703451	-0.06907739	-0.125801221	0.000968596	0.013563169	0.267968378
OR51B5	-0.151662537	0.050363112	-0.000220833	0.148933648	-0.006402769	-0.094512038	0.044291922	-0.226291224	0.132541561	0.295062556
NFASC	0.131981065	-0.063469487	0.041295765	0.171571311	0.112873445	0.170855282	0.138207595	0.118762041	0.147063741	0.020779178
FILIP1	-0.148199581	-0.031330571	-0.585801359	-0.300782217	-0.269484473	-0.309257846	-0.318852741	-0.209579326	-0.543491467	-0.590088633
STARD6	0.269623139	-0.414832378	0.056849193	0.087412388	0.123623655	0.099086023	0.062293252	0.201257001	0.132613468	0.104472046
ARSK	0.033576659	-0.033889242	0.022870995	-0.009909577	0.127163088	0.326920074	0.309409363	0.310113546	0.275227615	0.064336419
PPIL6	0.045826213	0.025426529	-0.283336076	-0.185294388	-0.152812935	-0.243972301	-0.265540419	-0.202980068	-0.222081556	-0.01935383
C6orf70	0.05316823	-0.022114905	0.020569005	0.009908243	-0.087347201	-0.087075576	-0.106212444	-0.172674274	-0.048651852	0.038821114
SOCS6	0.070455901	0.103871108	-0.214275398	0.001597509	-0.044430747	-0.155000231	-0.260871822	-0.187658601	-0.276893319	-0.254436682
ZNF533	0.139251438	-0.221862591	0.120057584	0.073593994	0.070534387	0.052662215	-0.103981514	0.092829217	0.047341546	0.043644881
STARD3	0.005466536	-0.111732671	-0.060836679	0.043420304	0.021239441	-0.09876949	-0.260502999	-0.099874724	-0.161820026	-0.072923124
PTPRU	0.040608206	0.025343768	-0.022152387	0.095783348	-0.079481585	-0.106844663	-0.093393083	-0.207473339	0.011029307	0.171465174
ADAT1	-0.036483975	0.295418861	0.237516025	0.06902267	-0.025919587	0.235834871	0.435510347	0.055919882	0.316324227	0.158155313
FMR1NB	0.105852157	0.031049188	0.0986525	0.076282299	-0.023416592	-0.032712646	-0.10493499	-0.064620553	0.030437713	0.119662276
C1orf69	-0.164854817	0.182959925	0.166477599	-0.017964159	-0.180465285	-0.023614961	0.207333362	-0.188543392	0.194020191	0.271916124
MEOX1	-0.052866195	0.003646364	0.209107872	0.359021894	0.294556257	0.29107646	0.285652231	0.185297039	0.388168732	0.357706578
C19orf23	-0.086171782	0.239624102	-0.51273291	-0.400777934	-0.301820361	-0.367474212	-0.349259311	-0.312373606	-0.542773283	-0.504729512
C8orf46	-0.043311267	0.112847153	-0.35032265	-0.119701938	-0.201653543	-0.138012867	-0.049172989	-0.084428205	-0.075943596	-0.045215194
ACTR3	0.065610543	-0.106893413	-0.061762457	0.266386627	0.258661152	0.130894628	0.16625902	0.067511354	0.224185361	0.230129926
RNF168	0.023161224	0.22307368	-0.05208106	0.010830836	0.06458268	0.177088857	0.274737242	0.144937917	0.117786231	-0.10786822
KRTAP10-5	0.106984669	-0.133023254	0.008490014	0.134639805	0.063364164	-0.007616463	0.045245582	0.001897008	0.07842716	0.07079708
TSNAXIP1	-0.024110475	-0.140968863	0.139108201	0.166168783	0.203913542	0.130954421	0.078042084	0.093089411	0.249203165	0.312570878
SAE1	-0.016590082	-0.003054831	0.534135297	0.258329476	0.284822706	0.282678978	0.165237079	0.227552969	0.231746552	0.070466849
CCL20	-0.10241269	-0.230321887	-0.307521414	-0.098836309	0.157558211	0.139590861	0.029674818	0.232399106	-0.159437129	-0.39219869
NUBP2	-0.16365824	0.177542589	0.125189413	0.1209982	0.095929205	0.089892323	0.053656436	-0.08891296	0.183551408	0.225220326
EREG	-0.200046357	0.151244863	-0.317326753	-0.272915221	-0.281736985	-0.420126183	-0.361678256	-0.352999233	-0.434997115	-0.203970612
SGCD	-0.043220426	0.099993233	-0.052931599	-0.284808012	-0.225399738	-0.064430215	0.13499228	-0.112789796	0.000603574	-0.076336241
ALKBH5	-0.142105062	0.200387678	0.004730514	-0.296505807	-0.367335626	-0.247878953	-0.209870463	-0.20059888	-0.251689794	-0.085372212
GUSBL2	-0.108611023	-0.003011412	0.055912105	0.043490291	0.024365505	-0.10369789	-0.047359063	-0.020268026	0.054292453	0.199097968
CPA6	-0.052044036	-0.204762306	-0.063245884	0.028382917	0.154078546	0.191516992	0.128605069	0.236834718	0.08858999	-0.050879159
SULT1A1	0.001350988	-0.000505214	0.059031606	0.098306602	-0.07909328	-0.028537016	0.024774068	-0.203957912	0.13623129	0.260789323
CBWD2	-0.276427372	0.041866417	0.103234576	0.10143646	0.063480992	0.000398843	0.047415128	-0.208783358	0.128106109	0.272687469
IGSF1	0.077159978	-0.130696726	0.091762137	-0.049401538	-0.020502685	-0.028319533	-0.063074324	0.05610165	-0.011153846	0.030571406
POLR2J	0.010078305	0.135045467	0.028474208	0.02443816	-0.143748861	-0.245940633	-0.255326933	-0.291023957	-0.15618347	0.076506202
CCDC85B	-0.137106795	0.028014407	-0.122389084	-0.06339138	-0.143177854	-0.156989776	-0.087349976	-0.204932518	-0.102217906	-0.035729519
ZNF607	0.198455905	-0.077228094	0.173617742	-0.0088076	-0.104099072	-0.095455215	-0.156606372	-0.004551158	0.047909939	0.300921906
PLAG1	-0.181318919	0.199366992	0.029127859	0.049757038	-0.123411107	-0.038937533	0.180746175	-0.245975705	0.189728491	0.236981409
PODXL2	-0.313412064	0.246609888	-0.054594833	0.071243782	-0.121407669	-0.295003845	-0.179805133	-0.375974241	-0.130347342	0.12132466
CD200R1L	0.131169747	0.081455299	-0.083205446	0.133736539	0.086003129	0.07112453	0.169963209	0.076532532	0.148113736	0.073289214
CBX7	0.025839478	-0.167022955	-0.155757618	-0.10484346	-0.098058387	-0.049023504	-0.1352494	-0.034564022	-0.175145229	-0.149589849
LEPREL1	-0.070866989	0.138582492	-0.295379291	-0.38171433	-0.392815615	-0.45750304	-0.442966969	-0.374726295	-0.538559016	-0.354507396
RASSF6	0.039565264	0.196528399	0.057865368	0.324915996	0.185146128	-0.01630147	-0.001539454	0.001151815	0.06842273	0.179210639
HMGCR	0.166926662	-0.044837906	-0.061000019	-0.247939383	-0.230086789	-0.145533508	-0.175370404	-0.158549335	-0.223979072	-0.18750088
LOC284757	-0.006123689	0.077361254	-0.12375975	0.065906565	0.073093451	0.073942316	-0.10075949	0.12280543	-0.085740534	-0.206850076
RFX6	-0.007028875	-0.332982485	-0.045454469	-0.030353648	0.105960785	0.013014839	-0.102917819	0.131125556	-0.106941226	-0.178148859
SPPL3	0.072596649	-0.016009738	-0.05770208	-0.046970717	-0.129453352	-0.232506261	-0.258687121	-0.166527162	-0.234985614	-0.11304009
NUP50	-0.109721348	0.230139761	-0.107570231	-0.052178904	0.017513557	-0.098380535	-0.047603272	-0.142903152	-0.075187335	-0.056333515
SPG21	0.041534891	-0.04214256	0.316057603	0.319885233	0.32096153	0.455197399	0.366563744	0.340192799	0.47819517	0.260415303
SMAGP	0.137509312	-0.253014978	-0.169944804	-0.205721037	-0.155704364	-0.056073788	-0.046338681	0.082642379	-0.06178622	-0.043242992
MT1M	-0.368546644	0.446285023	-0.482479606	-0.433553517	-0.479880237	-0.561321401	-0.452526434	-0.608660496	-0.535853025	-0.266786989
FGFR1OP2	0.097072483	-0.291338199	-0.305626571	-0.17406466	-0.064354188	-0.162569937	-0.314190241	-0.075633149	-0.312703297	-0.270503027
KCNC2	-0.053793225	-0.026749226	-0.043189791	0.022348649	-0.122306798	0.037584303	0.282968281	-0.084642235	0.147162367	0.08362142
ADARB1	-0.009900495	0.250804416	0.167481799	0.129142318	-0.029613155	-0.048606577	-0.068045946	-0.199513549	0.059680173	0.168892522
C1orf57	-0.040697667	0.105185034	0.308793485	0.224817349	0.010773547	0.047713577	0.216856071	-0.058642234	0.257149646	0.322475977
SRPK2	0.058538783	0.135014811	0.014974165	-0.099271811	-0.058866707	0.10553699	0.147711701	0.149512439	0.067611474	-0.08567006
CEACAM4	-0.081969866	0.108419382	-0.260403152	-0.023780903	-0.10182608	-0.229883962	-0.20347994	-0.352174912	-0.219082223	-0.13984128
YTHDF3	-0.002009781	-0.225294203	-0.262745254	-0.230226245	-0.07774713	-0.237634674	-0.367215753	-0.149271821	-0.349839772	-0.212088679
GALT	-0.017439226	0.007974088	0.311414691	0.261510718	0.099797273	0.103614071	0.111650233	0.003692157	0.300902287	0.405104111
MAGEL2	0.013993572	0.114848103	-0.106127719	0.18496332	0.088363131	-0.015149533	-0.12055418	-0.060363041	-0.062520589	-0.088667263
SEC23B	0.106716532	-0.025300203	-0.187428008	-0.195973558	-0.051779894	-0.115775201	-0.187038598	-0.084244266	-0.246715397	-0.272740778
OR2AG2	0.02459793	-0.036201305	-0.071814322	-0.019725767	-0.045479899	0.01614872	0.136275508	0.094522857	0.015132802	-0.083016059
MLEC	0.080414165	-0.001228556	0.361800586	0.299006409	0.132984634	0.23367188	0.319364888	0.062318402	0.387938836	0.354604747
KIAA0319	-0.142426077	0.206045674	-0.100124382	-0.116985094	-0.208667836	-0.176893111	-0.08194685	-0.217980851	-0.118618004	-0.052675296
HR	-0.079264419	0.019008315	0.011015717	-0.218729235	-0.144201419	-0.181483217	-0.039326244	-0.08739201	-0.145132671	-0.034027316
TSEN54	-0.065645022	0.12378726	0.241003983	0.342656806	0.136915597	0.137780044	0.187595238	-0.032106128	0.273145193	0.32828681
RPS6KA5	-0.014204468	-0.17108689	-0.409502382	-0.424284296	-0.196140811	-0.277837478	-0.340521197	-0.063995572	-0.469756581	-0.440177469
CLEC12B	-0.037762629	0.052649007	0.062331182	-0.042854526	-0.083590538	0.007033728	0.224882973	0.004754429	0.154114928	0.137179668
CCDC34	0.013270928	-0.237799518	0.42060522	0.380685726	0.268253602	0.266034338	0.225428757	0.242215486	0.37860527	0.376182162
MVD	0.067771012	-0.043262146	0.325148176	0.11197629	0.019714325	0.252142041	0.440322866	0.052673453	0.410768642	0.31906524
TSPYL2	-0.081674098	0.201434306	-0.350418473	-0.199385865	-0.122382193	-0.19035117	-0.301671583	-0.098874513	-0.417163574	-0.44499794
ASNA1	-0.044069638	0.052849536	-0.104801027	0.039995132	-0.080031048	-0.170110291	-0.198740458	-0.212769294	-0.115779954	0.033563638
SCN3A	-0.133339488	-0.111564314	-0.006144213	-0.173775539	-0.123659265	0.079124844	0.116878602	-0.011403843	0.088395041	-0.018004845
NCAPH	-0.032660394	-0.087197866	-0.007280221	-0.024221054	0.013643669	-0.085623874	-0.224661164	-0.106835261	-0.116691027	0.034236866
ZFHX4	-0.038235522	-0.080856667	-0.037480533	-0.095169206	-0.064110088	0.02293394	0.110786807	0.059605199	0.085795228	0.037778398
NRG1	0.029143351	-0.209352595	-0.097373298	0.086131718	0.024993071	-0.120800374	-0.1955404	-0.03359522	-0.098328509	0.015490474
WTAP	-0.056836599	-0.175699868	-0.059335544	0.127464196	0.06035281	-0.161933258	-0.184511837	-0.201369916	-0.072877307	0.143121117
NSFL1C	0.027175862	0.154626316	0.329260744	0.245663692	0.128832376	0.253488397	0.409879953	0.04702024	0.380561073	0.283464559
CBFA2T3	0.061945502	0.086390023	0.114957108	0.116816664	0.050965096	0.119443152	0.084222333	0.127703214	0.190237075	0.216104909
STAP2	-0.077078342	0.015739656	0.247098223	0.174621482	0.106157645	0.068594496	-0.107288338	-0.004525417	0.144207245	0.300208549
ZMYM6	0.035553191	-0.023833603	0.03114407	0.120326113	0.026501879	-0.115161323	-0.192625223	-0.152391475	-0.035398008	0.125814351
FANCD2	-0.075210762	-0.035429139	-0.022101481	-0.150733629	-0.042933213	0.003650664	0.014824602	0.051992852	-0.046517836	-0.12739461
EDEM3	0.142783458	-0.143723113	-0.092414195	0.099801519	0.217551742	0.114427857	-0.130597355	0.175544782	-0.104789523	-0.23636423
KCNIP2	0.009664433	0.237368726	0.091480317	-0.052569144	-0.181318616	-0.264841506	-0.045946933	-0.20622165	-0.069555669	0.145954835
EXOD1	-0.126430491	-0.229665256	-0.028289991	0.239424343	0.124215058	-0.006754856	-0.077819392	-0.028579991	-0.008217852	0.032453337
ZNF644	0.0377499	0.27569038	-0.047718471	0.172554501	0.000772095	-0.00117879	0.049534273	-0.097990669	0.016278291	-0.036791489
VAV3	-0.00850308	-0.031929254	0.242630131	0.142749135	0.082012391	0.023418196	-0.07516582	-0.027237487	0.025643891	0.075575366
CCDC69	0.075631385	-0.008283485	-0.049429398	0.063053603	0.012535783	-0.026932397	-0.122142663	-0.072562278	-0.07017707	-0.061326637
GFM1	-0.12391067	-0.047147163	-0.135188261	-0.140283249	-0.072566036	-0.211809436	-0.201071128	-0.169778212	-0.265851772	-0.213232473
C1orf198	0.090420853	-0.023342976	-0.162280709	-0.125613368	0.018723208	-0.100385376	-0.250590551	0.047842422	-0.348178927	-0.420529517
SAR1A	-0.049333002	-0.250595953	0.009619136	0.325535041	0.377265139	0.317222707	0.141586905	0.276008416	0.274344792	0.175000315
TMEM137	-0.095601094	0.145243768	-0.285853933	-0.340814115	-0.374045058	-0.437136874	-0.276003184	-0.293449118	-0.41542751	-0.289322896
MGLL	0.011624721	0.053275031	0.324065253	0.422822896	0.37552368	0.478233278	0.490784351	0.38637878	0.478659091	0.170647503
TRIM34	-0.208424572	0.244456717	-0.031980844	-0.043883228	-0.21421625	-0.270048457	-0.115838238	-0.232032222	-0.121573784	-0.019564895
ZNF254	0.122266574	-0.366281283	0.08368777	0.06716927	0.131259304	0.009240514	-0.203767739	0.084190064	-0.054000871	-0.000175537
C15orf17	-0.018391453	-0.074106096	0.080746481	0.190346245	0.06149182	0.182121482	0.30561046	0.075122879	0.309238182	0.254985242
BPHL	-0.120686858	0.013691923	0.219726838	0.373068979	0.191299951	0.030102145	0.120867381	-0.037032282	0.203018521	0.320705422
CYP27C1	0.049860397	0.063560781	-0.106585457	-0.055085352	-0.092698387	-0.091197187	-0.087275033	-0.026235353	-0.123460901	-0.141730136
CNNM1	0.024456324	0.194390511	-0.081261849	-0.09113328	-0.1046951	-0.110207599	-0.029234015	-0.023462698	-0.041752677	0.035006434
RPAP2	-0.111380449	-0.128001442	0.186722684	0.188374991	0.124063153	0.061583186	0.128678301	-0.027748607	0.285748316	0.382406182
SYT17	0.184210136	-0.204215487	0.424284022	0.169188007	0.080143528	0.158208314	0.170572547	0.125366244	0.277265258	0.314557098
TRIM29	0.079965134	-0.062073244	0.160349614	-0.091099559	-0.083094625	-0.154521051	-0.179719935	-0.123783676	-0.044769899	0.214614985
EIF5	-0.271458834	0.223166052	-0.44770435	-0.268505689	-0.206876185	-0.365116805	-0.320711461	-0.308742187	-0.524084528	-0.495445451
CRTC2	-0.04150179	0.032539538	-0.263896975	-0.105283355	-0.108578706	-0.254916351	-0.393276565	-0.180868922	-0.422609202	-0.349014093
SFRS11	0.121096622	-0.185815351	-0.334579373	-0.187944522	-0.027420463	-0.19303607	-0.399973385	-0.01140356	-0.404203229	-0.372927829
STMN1	-0.013081891	0.06693492	0.192463182	0.376657367	0.265641614	0.238808526	0.12307446	0.078088021	0.18873919	0.064719473
FIBP	-0.054395258	0.013871425	0.09145153	0.222784705	0.091979784	0.002929925	-0.024425793	-0.03993444	0.06734367	0.184333497
CFH	0.235344028	-0.051403491	-0.024526567	0.109878395	0.047086403	-0.101149239	-0.169889546	-0.058988447	-0.057881079	0.054129941
PPM1M	0.128099369	-0.174147222	0.428847243	0.364420884	0.289249737	0.389770569	0.28736989	0.349175734	0.424188554	0.277308677
IQCB1	0.012378764	-0.252602917	-0.139809144	-0.03433309	0.073380985	0.003144424	-0.195275437	0.078611845	-0.152894458	-0.182478854
PMEPA1	-0.011677604	0.060642058	-0.220632793	-0.007107683	-0.00557171	-0.064690867	-0.110279239	-0.049159661	-0.144480319	-0.132228246
PLEKHG2	-0.074773055	0.167637162	0.010579971	0.108653691	0.231962815	0.134874492	0.086498078	0.140672764	0.043158385	-0.079791739
ZC3H8	-0.030402263	-0.021034249	0.19138607	0.356746031	0.275180067	0.382775535	0.283203136	0.221600762	0.397099098	0.216173355
JMJD5	-0.212116597	-0.014087827	0.19093766	0.241752194	0.256824349	0.12328294	-0.113747485	0.105719685	-0.025252532	-0.085469511
SUNC1	0.031589973	-0.010574588	-0.04499904	0.022726578	-0.053083068	-0.023918415	0.046475525	-0.121259859	0.021990613	0.030543201
MITF	-0.074335748	-0.223276404	-0.068337528	-0.08943188	0.028976731	-0.014066852	0.02121936	0.077088024	-0.098938421	-0.204610248
ACTL6B	0.162671963	0.112710842	0.019698564	-0.33269692	-0.378883878	-0.323618794	-0.307134761	-0.216758862	-0.326517525	-0.250393577
TMEM14C	0.02731763	-0.123339738	0.151469942	0.330689345	0.195482026	0.074970261	0.030275299	-0.046318994	0.254737574	0.427857689
C1orf151	0.122663321	-0.139322052	0.005797663	0.061144262	0.07956535	-0.023125682	-0.206308665	0.048639722	-0.072108222	0.119943334
AHCY	-0.127723149	-0.117135429	-0.215078915	-0.258728668	-0.259293344	-0.256871777	-0.301925949	-0.302434482	-0.22220769	0.029037875
TMUB2	-0.11760332	0.194154633	0.210219723	0.286027831	0.123562759	0.148454707	0.130359296	-0.022777238	0.222870496	0.252206044
SIRT4	-0.056796577	-0.054023167	0.355332942	0.351120933	0.24513861	0.265377269	0.177785204	0.098275542	0.408327796	0.413421169
ABL2	-0.117039765	0.116649336	-0.406355709	-0.416789097	-0.312125553	-0.326419089	-0.132359931	-0.239982631	-0.397146553	-0.368059599
RSAD2	-0.077605246	-0.167789153	0.269164031	0.392763025	0.365850487	0.376284544	0.368150567	0.362584275	0.393372152	0.156602517
XPO4	-0.107486177	0.213672959	-0.218594567	-0.169423317	-0.20970961	-0.261176668	-0.267495873	-0.31492626	-0.35259981	-0.285019204
NME2	0.007258678	0.128138371	0.020974732	0.200137535	0.076659761	0.109013807	0.085027453	-0.006749363	0.144820447	0.084849471
SALL1	-0.281798996	0.160747828	-0.319010698	-0.249913011	-0.129726281	-0.021804548	0.053897651	-0.02127825	-0.211155338	-0.382407662
TNKS	-0.020853379	0.248290143	0.238915252	0.1403253	0.035475252	0.131849493	0.358919981	-0.021964349	0.295962438	0.156219083
TLR8	0.068176005	0.137178292	0.03572902	0.324663369	0.308371108	0.286316042	0.228354324	0.119144246	0.157509846	-0.104831426
TXNRD2	-0.063729341	0.237340473	-0.24235805	-0.317668657	-0.399636925	-0.391660664	-0.306494683	-0.40664824	-0.347434676	-0.147214018
MTP18	0.016008951	-0.039602402	-0.018488564	0.112139049	0.177297513	0.029399147	-0.233879932	0.017135005	-0.131322484	-0.136060999
C1orf84	-0.047630855	0.021279499	-0.012921876	-0.067951476	-0.101142431	-0.162452346	0.002163767	-0.177235797	-0.109498324	-0.069203167
RHEB	0.137022293	-0.061366396	-0.13058798	0.202305723	0.173949968	0.158829686	0.090930864	0.08397832	0.194724747	0.179966374
FMNL3	0.055490264	-0.014182586	0.011075542	-0.046767596	0.072103836	0.181860999	0.221763821	0.288719401	0.057704456	-0.225940605
LOC728946	-0.126691082	0.015487889	0.009877712	0.119039778	0.051428316	0.008746838	0.139583909	-0.10991953	0.123729191	0.149589964
HHIPL1	-0.021011826	-0.153749952	0.038831307	-0.077463367	0.056586525	0.033779999	0.003051109	0.11499459	0.025235438	0.103687134
MSRB2	0.026253501	-0.075431794	0.264449587	0.213546785	0.073284402	0.069762261	0.044676002	0.10085846	0.231635383	0.359497039
TERF2IP	0.061622102	-0.200792199	-0.455414972	-0.2789078	0.012330276	0.031983007	-0.090964959	0.110779226	-0.260211768	-0.432032437
ADNP	-0.144360431	-0.047123421	0.122246579	0.25207075	0.242709244	0.227766533	0.166676061	0.103060154	0.27002915	0.247485664
CENPI	0.092865591	-0.378413717	0.160746772	0.030068385	0.187063949	0.261340781	0.248370155	0.340705325	0.222921233	0.052254797
MBNL2	0.084350345	-0.283316054	-0.413694088	-0.207055217	-0.026178893	-0.256259444	-0.413283586	-0.073329519	-0.437752283	-0.31636156
ZNF831	0.136417685	0.013882653	-0.112071685	0.000838757	-0.082837416	-0.014804184	0.151790171	-0.110467877	0.110574629	0.11629152
SPN	-0.049805555	-0.191941595	-0.111569322	-0.184178067	-0.133214761	-0.027206113	-0.094550985	0.027639094	-0.025504056	-0.03054363
RAD54L	-0.031356227	-0.089621461	0.208064914	0.382433132	0.272411194	0.098977047	0.015552594	0.031594475	0.143100152	0.17558649
CRABP1	0.158327056	-0.05696537	0.157727116	0.086237783	-0.00091566	-0.092333256	0.041401665	-0.122416103	0.021537092	0.132762916
ATP1B1	0.026246893	-0.019183167	-0.068981286	-0.065662126	0.117745768	0.165922678	0.099104139	0.195503609	-0.034614343	-0.232316783
ZCCHC13	0.00306655	-0.311719616	-0.124664542	-0.111696096	0.097993449	0.128242669	-0.016365213	0.250221857	-0.059075318	-0.204437869
ZNF573	0.073881368	-0.347450365	0.041989603	0.021092622	0.14024151	0.164813954	0.020620551	0.283086122	0.075791557	-0.034856183
FRMPD2	0.081459898	0.21869877	0.137274643	-0.033091201	-0.06921137	-0.020311905	0.100495347	-0.070462086	0.148279801	0.254554127
ABT1	-0.080334276	-0.055706803	-0.185597297	0.020194979	0.052742628	-0.092992719	-0.301701069	-0.110211404	-0.255260757	-0.243395873
ZNF365	-0.001930456	0.052239582	-0.032100528	-0.152482372	-0.103038829	-0.033010295	0.088723609	-0.022191749	-0.001401876	0.050007499
KBTBD6	0.105564236	-0.271910691	0.094006637	0.206168433	0.248339439	0.169894017	-0.037150627	0.15680099	0.086369864	0.028757451
C18orf19	0.007579727	0.295341468	0.194379617	0.053342743	0.025648426	0.240223576	0.335038458	0.061593964	0.314305045	0.188626506
CFP	-0.193841296	0.158449257	0.00796005	0.13148128	0.079472221	0.001045152	-0.092993985	-0.065772965	-0.042363427	-0.031595501
DAZ2	-0.301078446	0.449756719	-0.153110213	-0.007011766	-0.16039723	-0.322870432	-0.218466969	-0.425176607	-0.139830041	0.207508989
RFC3	-0.048409879	0.036969786	0.317189847	0.35361935	0.348506546	0.528168445	0.546016924	0.37453898	0.543303523	0.234308041
TRIP11	0.06307482	0.182394631	0.16846282	0.179575025	0.139354819	0.212346495	0.212210417	0.090661386	0.184420303	0.014751933
GRLF1	-0.019598561	-0.064921771	0.029301873	0.021964437	0.087552331	0.17256046	0.062567917	0.152736088	0.039603492	-0.114313954
MAP3K10	0.043059739	0.029029092	-0.046884619	0.106830964	0.017746041	-0.049406206	-0.107575396	-0.085679514	-0.065123981	-0.048584197
ZNF501	0.05618657	-0.063141914	0.153998015	0.277990739	0.154308544	0.142904284	0.274635824	0.090054633	0.419403014	0.532807066
FAM156A	0.120154947	-0.226614648	-0.008922113	0.163504087	0.200429196	0.203101211	0.175839578	0.240701087	0.098612004	-0.084243424
NR4A3	-0.042848651	-0.077536728	-0.420096919	-0.281239339	-0.14045237	-0.196807885	-0.20014357	-0.050399531	-0.39398458	-0.399750674
ZNF418	-0.165023674	0.056621569	0.224500839	0.018632795	-0.126526086	-0.013969571	0.205639339	-0.125673527	0.244538078	0.351650885
GGA1	0.033583979	0.138378044	0.115108537	0.231464672	0.176560386	0.273555204	0.229201935	0.138999284	0.327153877	0.2082941
ABCG1	-0.000185501	0.055737889	-0.08235292	-0.09749928	0.008286838	0.020869115	0.010160882	0.086461612	-0.079455168	-0.187428143
MEX3C	-0.015995927	-0.20670276	-0.170698203	-0.050808451	0.088900062	-0.110450204	-0.35789284	-0.018985192	-0.298635669	-0.239265751
KIAA1026	0.117515741	0.298645991	-0.15568231	-0.327228944	-0.40959357	-0.402167336	-0.237265988	-0.371399384	-0.267529946	-0.05728855
C1orf102	0.06885433	0.089033633	0.048466468	0.095519883	-0.026059332	-0.053176544	-0.095248823	-0.163315464	-0.006832618	0.086794231
MSLNL	0.065768277	0.031315482	0.028554992	0.066834154	-0.042740012	-0.117331622	-0.078691063	-0.2150193	0.086304251	0.301926897
C7orf60	0.16323339	-0.245925425	0.161677423	0.230256697	0.269814538	0.223743291	-0.020002552	0.254288242	0.164998082	0.14731827
DRD2	-0.000839327	0.210640023	-0.091007874	0.23139697	0.133644228	0.070019983	0.067604069	-0.026863905	0.167482407	0.253348404
POLH	0.237036138	-0.20315932	0.151245433	0.165615587	0.211224699	0.263852873	0.070902046	0.308603063	0.120908385	-0.093606782
NACC1	-0.024072461	0.154193252	0.025222881	0.102012592	0.054009017	0.009365309	-0.053755687	-0.027872909	-0.090623513	-0.134938618
FBXL10	-0.042244806	-0.078019374	-0.177786924	0.028995341	0.049517447	-0.054569503	-0.22931985	-0.014420308	-0.198006323	-0.218186562
KHDRBS2	0.001401984	0.006552889	-0.02562088	0.097761583	-0.025395625	-0.276364744	-0.216064251	-0.335682735	-0.185880575	-0.028126679
OAS1	-0.083409746	-0.250122083	0.181455645	0.405069667	0.395529786	0.374891097	0.246600303	0.317085367	0.328031575	0.154537518
ABCB5	0.016383176	0.060044735	-0.028841662	0.00936085	0.060442409	0.008876567	0.077902043	0.033004726	0.02762109	-0.052768362
DRG1	-0.026245894	0.135107863	0.259051809	0.097080979	0.059131273	0.178928137	0.10228314	0.038119514	0.219022712	0.162142241
MAPKBP1	0.064581886	0.085452105	-0.05356267	-0.128985124	-0.190090509	-0.296886257	-0.294692129	-0.159619976	-0.273271734	-0.120605802
LSS	0.086553128	-0.014606769	0.326836413	0.155772797	0.067488506	0.375279012	0.548337344	0.227556238	0.542347335	0.347873697
L3MBTL	0.018820954	0.014680081	0.253342761	0.367048769	0.205601568	0.203890586	0.270250996	0.093618316	0.41625747	0.380951971
WDR54	0.02740028	-0.030629818	0.11094156	0.310071927	0.213103536	0.12632829	0.081436068	0.067912806	0.16571538	0.120841034
C16orf68	-0.173683358	0.236672921	-0.030868998	-0.068115905	-0.181375421	-0.275537398	-0.25128074	-0.384689644	-0.228080484	-0.046968271
FAM83E	0.02168656	0.069279598	0.004749046	-0.091857258	-0.043550552	0.077022012	0.190295525	0.064860066	0.134786	0.06648502
PCYT1A	-0.032622432	-0.019718941	-0.025360793	0.2861716	0.181470611	0.00311886	-0.056467512	-0.098460561	0.05371948	0.148979594
BAZ1A	-0.122182991	0.270108854	-0.384598001	-0.225565436	-0.076377368	-0.165381143	-0.181477215	-0.117314283	-0.343622854	-0.406552022
ECM1	-0.063462846	0.456501861	-0.029292211	-0.081969849	-0.133126396	-0.048848838	-0.006036902	-0.113071307	-0.066909528	-0.092835767
AKIRIN1	-0.054546613	0.184927493	-0.07756091	0.023760458	0.139288368	0.203921132	0.172326773	0.216183733	0.026271067	-0.227312082
FIS1	-0.112175752	-0.098222525	-0.015341866	-0.018774799	-0.036630592	-0.194932606	-0.365274036	-0.165529316	-0.21637048	-0.016724185
PAMR1	-0.033916192	0.28514791	-0.252357967	-0.169597455	-0.337469885	-0.36825634	-0.106414761	-0.346443396	-0.247249633	-0.12303522
TACR3	-0.076431041	-0.040884191	-0.088921107	-0.04734786	-0.150904831	-0.129766782	0.09049697	-0.166305956	0.037301164	0.15884482
PAN2	-0.045566586	0.260735385	0.028473781	0.070246842	-0.031210319	-0.073936851	-0.003668967	-0.143777764	-0.058351142	-0.04824496
CCDC114	0.023487661	-0.036953184	-0.104659838	-0.061418649	-0.006328712	-0.093884307	-0.076876696	0.034876859	-0.108814611	-0.077254574
CRTAC1	0.323730789	-0.191836192	-0.146340451	0.05185944	0.020997792	-0.085604099	-0.123922525	-0.049722281	-0.083304361	0.005354183
DAOA	0.00492741	-0.035470505	0.013270107	-0.046405612	-0.00310769	0.099781897	0.236707578	0.10542456	0.151923015	0.049960528
SPEF2	-0.160113168	-0.152865656	-0.172444842	-0.117099582	-0.127025912	-0.080591714	0.002550965	-0.108857791	-0.039767621	0.053963714
KLRG1	0.140592783	-0.064587764	0.303703083	0.278834064	0.197572933	0.323747284	0.393990967	0.153670196	0.527843049	0.446543808
SLC43A3	0.009866443	0.217208852	0.02841143	0.039911136	-0.024678917	-0.087360581	0.006258419	-0.113413994	-0.113896822	-0.131410644
CHD4	-0.174569442	0.270363822	-0.031189316	0.067535705	-0.116426452	-0.183172796	-0.076115346	-0.274017206	-0.111555844	0.024583859
HYDIN	0.091726433	-0.205080062	0.478956743	0.426808036	0.372230108	0.212796597	0.027199809	0.228055443	0.245863148	0.283461799
MRPS18C	0.090933043	-0.072799652	0.196474992	0.255681235	0.189002494	0.224300381	0.150703912	0.078767363	0.306907508	0.276920172
DSCAM	0.017654404	0.252620471	-0.006485037	-0.296061381	-0.438517451	-0.225968314	-0.000151663	-0.303115463	-0.039025085	0.051277454
DAG1	0.008260193	0.301961552	0.415475649	0.275645239	0.091484436	0.183983324	0.269263271	0.09485423	0.296076603	0.266634301
WNT10A	0.311825534	-0.210888071	0.122260202	0.10764317	0.117733608	0.094234828	-0.056136422	0.171519998	0.146109723	0.193048109
SFXN4	0.026587711	-0.113272262	-0.126191948	-0.147671639	-0.148386804	-0.215160574	-0.370305022	-0.160040909	-0.279582582	-0.122349237
FAM53A	-0.087389739	-0.045562839	0.059175378	0.088165812	-0.022433393	-0.058364984	-0.130113306	-0.09707074	-0.010285197	0.112313968
GTF3A	-0.079119141	-0.149393309	0.184103752	0.093929182	-0.037662993	-0.073049851	-0.061060976	-0.151596352	0.142183933	0.353577856
TP53AP1	0.009730929	0.119813144	0.30918837	0.24000933	0.132602536	0.132481031	0.03874811	0.01454425	0.231727354	0.245366571
APH1A	-0.206307173	0.24418269	0.219275397	0.340064502	0.182493382	0.076748181	0.152416973	-0.145896011	0.254395161	0.356792737
IL1A	-0.210598399	-0.088811241	-0.227035131	-0.335394557	-0.173371806	-0.117151542	-0.039065817	0.011326035	-0.19393732	-0.213728623
MRPL54	0.063943355	0.000842684	0.039210152	-0.094836951	-0.225384415	-0.22491618	-0.262173709	-0.27302896	-0.113700755	0.142826707
C13orf15	-0.090456686	-0.012873022	-0.416264628	-0.290048599	-0.10602667	-0.223970889	-0.202881275	-0.106362654	-0.44053283	-0.456302453
SLC44A3	0.183015782	-0.168125958	0.344505734	0.341877605	0.411363899	0.573742199	0.497495191	0.41495154	0.545418465	0.231400603
SYT13	0.058854049	-0.008449989	0.138191484	0.144476476	0.201833992	0.220221235	0.225510912	0.243806408	0.245831243	0.108252613
SCAND2	0.131553576	-0.002505145	0.138762194	0.260380347	0.090954895	0.104104556	0.130169677	-0.021654082	0.213160586	0.201674692
CHKA	-0.142389265	0.235416032	-0.350717206	-0.168206205	-0.27556695	-0.420808967	-0.165364387	-0.340033755	-0.313140511	-0.131191179
IQSEC2	0.118382144	-0.193530964	0.206843773	0.118583952	0.055229789	-0.033579731	-0.145608255	-0.008469791	0.01364594	0.121616972
SLC13A3	-0.100673905	0.276679411	0.475020125	0.487434578	0.424876005	0.487939979	0.524371854	0.353534239	0.503598191	0.213062757
RYK	0.052076441	-0.071449582	0.062330806	-0.059770147	-0.111530498	-0.198774748	-0.251982799	-0.196487347	-0.175304416	0.032569294
GALNT5	-0.145178984	-0.249067632	0.028661331	-0.091976208	0.04699286	0.141627234	0.137852267	0.068372655	0.203368065	0.23577372
PTPRN	-0.043553279	0.102793653	-0.001032329	-0.140180496	-0.120235109	-0.042244327	0.101308041	-0.022821624	0.02486448	0.010756664
CDK5RAP3	-0.07918032	0.183458665	-0.064863529	-0.080195524	-0.160385459	-0.141503195	0.066220677	-0.082717543	-0.027960785	-0.009963559
LOC730012	-0.052252022	0.368581087	0.090930379	-0.005620236	-0.047607849	-0.163943353	-0.078468654	-0.151733924	-0.045251476	0.15177312
WWC1	-0.039115547	0.177650402	-0.278620185	-0.098141247	-0.05793787	-0.174746609	-0.204954238	-0.201412788	-0.336429142	-0.337635503
MAGEC3	0.111132386	-0.312095687	-0.090363537	-0.173516298	-0.078897003	0.017838199	-0.001099504	0.10575369	-0.040869952	-0.060170439
UBXN6	-0.129466557	0.123515235	0.260530091	0.107403028	0.002540133	0.143889511	0.196938805	0.03117617	0.359637919	0.46622602
RREB1	-0.002755836	0.003068763	-0.034095682	-0.073587311	-0.170574581	-0.273544643	-0.173040209	-0.158222491	-0.205024998	-0.066650715
CLGN	-0.16226207	-0.106885642	0.233305626	0.19530989	0.20385369	0.117030946	-0.004914351	0.081124686	0.155299503	0.197652432
MRE11A	0.159516475	-0.191349159	0.062071979	0.079935909	0.09242081	0.09075974	0.032944595	0.102956261	0.026550309	-0.065271104
SLC46A3	0.018934185	-0.081301332	0.553514988	0.595130115	0.50789231	0.559643648	0.482808887	0.444539293	0.709127393	0.580778894
C3orf57	0.092141648	-0.07826091	0.20111359	-0.108342417	-0.129335144	-0.114255188	-0.171388137	-0.106355831	-0.051364864	0.147245284
ACTC1	-0.017350074	-0.067141867	0.121002319	-0.057091106	0.014583035	0.039894696	0.094523527	0.091867863	0.017149718	-0.055622833
CDH23	-0.01858284	0.015096615	-0.003307464	-0.055003884	-0.181857517	-0.267198199	-0.307687032	-0.277127045	-0.172349931	0.070127937
DTX3	0.239997951	0.078305321	0.123857761	0.185081308	0.091329944	-0.06630765	-0.13212092	-0.019381769	-0.083119884	-0.009884894
SAAL1	-0.133676504	-0.078712847	0.082462718	0.154904784	0.043102914	0.032298143	0.106490782	-0.098137111	0.198621377	0.177976886
YJEFN3	0.141787409	0.074012521	-0.066159711	-0.210599273	-0.247004323	-0.139762542	-0.01175692	-0.140023524	-0.014539001	0.042446709
ATP9B	-0.110055985	0.20947203	-0.192808015	-0.088896156	-0.261099901	-0.344842541	-0.113360782	-0.417280664	-0.229401369	-0.047495228
ELFN2	0.222619002	-0.024562973	0.251569757	0.114122263	0.119814255	0.318167716	0.460871023	0.274218423	0.399218709	0.170124828
NUF2	0.018107432	-0.068434268	0.484626966	0.533105707	0.569249016	0.566094729	0.478160594	0.445846235	0.583266694	0.313300779
HIST1H2BJ	-0.145759736	0.058874817	0.28364973	0.384702575	0.213951483	0.166959858	0.187456269	0.015294326	0.339452944	0.423857551
ST6GALNAC2	0.079681172	0.030665947	0.028476917	0.13803941	0.045772607	-0.019365295	-0.095643236	-0.094657054	-0.004036641	0.074235573
LAMB1	0.110226919	-0.209422371	-0.267521545	-0.121860825	0.006085931	-0.121524044	-0.313373565	0.047353662	-0.320854012	-0.301003404
FAM19A4	0.017884976	0.16239116	0.046456206	0.231622862	0.053491679	-0.047594813	0.004633075	-0.10514888	0.097370697	0.215893076
TNFSF11	0.010748548	0.048861132	0.095814838	-0.009863445	-0.0035206	0.123260272	0.257911132	0.08584886	0.120153412	-0.045451115
NRXN3	0.243573975	-0.026673737	-0.303162996	-0.377632578	-0.32585051	-0.277514251	-0.172758024	-0.124914523	-0.361448243	-0.323743305
DEPDC5	0.082086675	-0.232445943	-0.100183951	-0.004575187	0.053982707	-0.02748414	-0.267767669	0.015991882	-0.216017651	-0.212181199
ZBTB25	0.106670279	0.003675331	-0.08960387	0.038801459	0.018090587	-0.035136797	-0.122462053	-0.052930747	-0.161090596	-0.234661698
CCNDBP1	0.158322286	0.059441376	0.330439205	0.33891082	0.365689648	0.460625166	0.377448052	0.291560871	0.477356156	0.250809135
PTPLAD1	-0.008219487	0.183885188	0.248556034	0.251041586	0.220506831	0.314772563	0.332401616	0.165855329	0.44497777	0.366459272
NPB	-0.017140858	0.210656573	0.20713765	0.177893619	0.003569027	0.013426993	0.082247719	-0.16876944	0.201923046	0.330558181
PEX19	-0.120517338	-0.072719733	-0.136661435	-0.099959796	-0.054681914	-0.165161039	-0.341463341	-0.047308124	-0.184514353	-0.019791877
PIGF	0.004214584	-0.214434278	0.091557599	-0.02148006	-0.021562081	0.009642434	-0.081489704	-0.044572717	0.090739156	0.164635279
MEGF9	0.032266752	0.155802854	0.348229492	0.328687803	0.310147765	0.524743975	0.584950827	0.371593628	0.54044238	0.215893566
BRPF3	-0.057704841	0.283017153	0.015888407	-0.152191084	-0.194145391	-0.046041584	-0.006512163	-0.16570299	0.025333881	0.034679661
KRTCAP2	0.337761778	-0.19294565	-0.068242838	0.206643354	0.147690397	-0.045930427	-0.164480866	0.043613883	-0.043320528	0.064713789
BRE	0.091896656	-0.178217355	-0.096180717	0.006314193	-0.069430252	-0.247530132	-0.157779881	-0.30102987	-0.103327021	0.113710073
SLC5A10	0.122876219	-0.025100161	0.207224421	-0.01514119	0.060727072	0.150189122	0.144045999	0.117980046	0.134012884	0.092036109
HMOX2	-0.124794401	0.227231264	-0.102732118	0.043152237	0.044096221	-0.079564	-0.175606188	-0.191390382	-0.201778608	-0.198574638
SEZ6	-0.006502233	-0.0053384	0.030078715	-0.094902469	-0.060707627	0.043154549	0.142657774	0.065613601	0.120934211	0.118889174
CAMK2D	-0.033480253	-0.031262963	0.029764928	0.06223047	0.075534497	0.077584142	0.015693828	0.080039565	0.041552285	0.065042154
SAMD1	-0.097110187	0.209681095	0.325331347	0.293166246	0.231058874	0.162540208	0.009245311	0.120589114	0.080895041	0.014518905
C10orf26	-0.001785133	0.028915346	-0.231169899	-0.235093061	-0.08036312	-0.007405862	-0.034188632	-0.024077575	-0.238815407	-0.403469928
ZC3H18	-0.011721527	0.09910186	-0.089191029	-0.015362569	-0.094213945	-0.186645441	-0.231950539	-0.0980663	-0.214627053	-0.11043716
CAV2	0.160158923	-0.289202283	0.119208808	0.21639928	0.372564854	0.445308727	0.225605149	0.513870051	0.312639559	0.117493241
ARHGAP25	-0.052482529	0.043277205	0.247540578	0.217074517	0.14268493	0.319614509	0.44060537	0.186442864	0.377657011	0.104974321
SP140L	-0.061436508	0.239189079	-0.015559502	-0.116879768	-0.089566089	0.073282289	0.290109318	0.054486223	0.060415321	-0.219215318
ARAF	-0.032297336	-0.007391529	-0.080818989	0.013105407	-0.034299598	-0.115561601	-0.248050974	-0.119390863	-0.191791104	-0.132932584
ATP11B	0.049043742	0.07700135	-0.002654338	-0.054556414	-0.003753381	-0.120903092	-0.14332285	-0.165697155	-0.231373214	-0.25075142
DAGLB	-0.052755195	0.067883163	0.054667917	0.156681456	0.137067106	0.066255792	-0.097718762	0.052227363	-0.067126882	-0.13518641
OSGEPL1	0.081232072	-0.294019819	0.235134272	0.305466306	0.329537732	0.368171143	0.200413952	0.333830193	0.386372807	0.265452103
SLC1A1	-0.200782085	0.076596912	-0.44845725	-0.405111144	-0.246595638	-0.373683384	-0.525042199	-0.312378829	-0.563937355	-0.405143112
JAG2	0.141683378	0.134440687	0.038834445	-0.019284089	-0.081573688	-0.104757648	0.033011716	-0.125055363	0.034705595	0.130693629
NOTCH3	-0.077573653	0.112070759	-0.07816782	-0.001477422	0.038762425	-0.08980653	-0.188150097	0.059127685	-0.262522576	-0.310545771
GNB2	-0.090082978	0.19529718	-0.175538053	-0.219999977	-0.266092467	-0.330466474	-0.366406637	-0.353801411	-0.38624126	-0.183212709
DDX25	-0.043919774	0.071146522	-0.040804374	-0.096951177	-0.04600465	-0.029929255	0.067155613	-0.031341412	0.047642208	0.094788816
EIF4E	0.158923804	-0.234401872	0.076384599	0.210342163	0.286301404	0.207203555	-0.053931485	0.240077737	0.087674923	0.013545663
LCP2	0.145282021	0.165274336	-0.037209998	0.137588833	0.237448654	0.362618558	0.274051669	0.352571118	0.118804888	-0.305830382
GABBR1	0.186446298	0.067778698	0.031533311	-0.167017332	-0.196533518	-0.210790317	-0.228858444	-0.122353786	-0.083343933	0.199498472
CREB5	-0.101213901	0.064011082	-0.144823117	-0.128556509	-0.043759416	-0.047716315	-0.000701827	0.013458249	-0.074684349	-0.075644923
MEX3B	0.148862655	-0.254390898	0.2009441	0.390473645	0.522877459	0.50926714	0.217546611	0.552029842	0.267331493	-0.062704527
DPM1	-0.137069443	0.224759076	-0.194867244	-0.193761362	-0.309499609	-0.222018361	-0.13482493	-0.297081004	-0.14356264	0.005636712
ACOT9	0.069572805	0.024033687	0.105020717	0.260383124	0.359100356	0.507357472	0.493607541	0.425106045	0.384274872	-0.019174117
XPNPEP3	-0.040382901	0.107212921	0.028088774	0.0585655	-0.063318707	-0.13691839	-0.197253466	-0.196260815	-0.135666978	-0.023660432
NANOG	-0.102657134	-0.1235926	0.237913348	-0.122830577	-0.100621024	-0.002918603	0.141344784	-0.07744478	0.133584749	0.163523415
C11orf74	0.029093252	-0.261874908	0.25744476	0.219520558	0.195636636	0.16132404	0.008586425	0.139507853	0.24329585	0.279461021
TMCC2	0.019922282	0.060617105	0.138990873	0.082314088	0.037895803	-0.018493238	0.057607754	-0.048229351	0.174306915	0.295189991
POLR2K	0.119514488	-0.381616681	-0.035873105	0.097242665	0.172869425	0.063143184	-0.158993068	0.13172596	-0.036162003	-0.032609426
SLC2A1	0.125504643	-0.024564538	-0.189390706	-0.227939859	-0.121450784	-0.287352544	-0.386291142	-0.161881477	-0.436214486	-0.3447351
FAM116B	-0.017076432	0.140195549	0.26624791	0.326168723	0.245945075	0.278722273	0.209717536	0.246059082	0.263297099	0.115602977
PPP1R10	-0.086081986	0.149227953	-0.414320626	-0.348021981	-0.312881081	-0.328171742	-0.343252356	-0.196541855	-0.453706896	-0.320885965
OR51G1	-0.189347575	0.085841323	-0.159090127	-0.123981446	-0.097751828	-0.108590608	-0.05861793	-0.078334411	-0.156886336	-0.20811464
SPP2	0.202614448	-0.158586541	-0.002110449	0.108755137	-0.001104354	-0.111534646	-0.158131601	-0.083108826	-0.040568835	0.086835556
HLA-DOA	0.163830668	-0.031490644	0.201288519	0.280726434	0.289184549	0.456755108	0.456309645	0.366333174	0.356954954	-0.029017891
CD40LG	0.193630468	-0.000751705	0.144691227	0.328088688	0.220367748	0.354009512	0.385485477	0.225587835	0.43679983	0.233591234
C5orf25	-0.219718599	0.16479084	-0.176324426	-0.039051311	-0.151042572	-0.204249023	-0.093915453	-0.257979632	-0.144722843	-0.031236967
ZCRB1	0.009262746	-0.220848246	-0.118489299	-0.191360323	-0.178745196	-0.207340933	-0.305175454	-0.133335189	-0.247724727	-0.104558822
WFDC12	-0.082488845	0.016919929	0.236883222	-0.137952063	-0.179888957	-0.205611586	-0.130437715	-0.170535657	0.005352336	0.321140074
NEFL	-0.065830501	0.20798197	-0.065809105	0.013286594	-0.078629944	-0.074427803	0.002306357	-0.188718178	0.01929103	0.139496786
ROCK2	0.154015056	-0.027096394	-0.134503918	-0.227376973	-0.024259437	-0.063516428	-0.206129271	0.031772834	-0.28721298	-0.332138046
PSMA8	0.095624029	-0.511212246	0.130251046	-0.185544891	0.052302326	0.059811102	-0.158125692	0.298285332	-0.045933675	0.044354277
PHLDA3	0.32828474	-0.241618689	0.092929068	0.255788035	0.218481894	0.137798142	-0.120758961	0.190682012	0.06466195	0.080293433
KLF10	-0.011241981	0.055444992	-0.224448266	-0.278457921	-0.154800279	-0.149886475	0.001648912	-0.03684466	-0.24211734	-0.315204355
CACNA1F	-0.219182628	-0.057675586	0.18404625	0.174299072	0.221661176	0.175410696	0.139480622	0.02858766	0.191310507	0.135347177
MDK	0.149024422	-0.071108127	0.163375938	0.264748945	0.303111139	0.299465878	-0.009905136	0.342093801	0.145168415	0.062191217
ARL8A	0.035081472	-0.098686062	-0.03191822	-0.105467079	-0.059532498	-0.035526052	-0.041215199	-0.016947372	0.001732915	0.004536728
ANKRD16	-0.163452513	0.440917177	-0.354385697	-0.371851526	-0.409913498	-0.471916159	-0.401403063	-0.447838526	-0.55238726	-0.414850853
SAMD3	0.022910149	0.019649632	0.294855107	0.326998923	0.157221093	0.259458703	0.328583054	0.027199025	0.451440406	0.431876291
SLC6A15	0.103900968	-0.008012158	-0.164570016	-0.174100732	-0.229120108	-0.244478289	-0.061347505	-0.156718051	-0.11588194	0.001360517
C9orf89	0.000201671	0.083646971	0.024386436	-0.132315197	-0.152663015	-0.176162626	-0.108370734	-0.229552296	-0.060441637	0.076275392
GRIN1	0.003555686	-0.063316438	0.002466293	-0.221878121	-0.180239493	-0.089279711	-0.006347504	-0.102134775	-0.021338769	0.038292789
B3GALT1	-0.008108012	-0.043184663	0.028248155	-0.043647324	0.012539786	0.071352446	0.143226338	0.106787827	0.101625688	0.033567725
RARA	-0.06453123	0.229909006	0.293441673	0.354749071	0.327823772	0.322325077	0.326397444	0.364508523	0.24817747	0.0332178
CTXN3	0.012077205	-0.237332757	0.036519936	-0.011975894	0.031335973	-0.077207823	-0.018238417	-0.045629807	0.010953078	0.136631656
CYP4B1	-0.189418373	0.055295404	0.052380417	-0.095088352	-0.134046383	-0.199499521	-0.207168815	-0.15605019	-0.094970363	0.07927065
CD79A	0.063057105	-0.006131959	0.113793211	0.038566208	0.09384788	0.221262582	0.270384988	0.173869757	0.278856827	0.173654757
KRTHA5	0.100107092	-0.020763155	-0.024647856	-0.099492459	-0.005511811	-0.004228756	-0.012688279	0.032974083	-0.029740901	-0.012863497
MTMR14	-0.07123012	-0.127924884	-0.143563081	-0.078445305	-0.131116646	-0.271256661	-0.304508764	-0.207741276	-0.264851385	-0.066600751
RP2	-0.02853322	-0.011051427	-0.075677454	-0.016309202	0.11025737	0.167655693	0.248108804	0.128706792	0.042535254	-0.132806406
TNFRSF8	-0.069861839	-0.179274123	-0.082034219	-0.025985325	0.075445886	-0.012305721	-0.074812817	0.045255064	0.024743666	0.182173782
PRPF6	-0.035566096	0.203803174	0.157992066	0.066370822	0.040442497	0.276838106	0.434042371	0.208136867	0.336298948	0.128184902
OTP	-0.149476446	0.064658613	0.003308897	-0.012849878	-0.086351954	0.003301304	0.190541682	-0.032206982	0.239432272	0.370905544
PSMG1	0.100270282	-0.024679396	-0.173240604	-0.098808856	-0.083082581	-0.025389017	-0.08325828	-0.084175567	-0.021026223	0.007272957
PLEKHB2	-0.103092271	0.172723562	0.066377233	-0.062143724	-0.029172434	0.064061366	0.095472395	0.04674585	0.086742816	0.06341309
FZD6	0.03096692	-0.241598189	-0.361292693	-0.28744412	-0.12982062	-0.308041735	-0.449311197	-0.14513193	-0.418296694	-0.196961138
SVIL	0.111832261	0.04548155	-0.088305627	-0.049491102	0.038303686	0.021167507	-0.106702518	0.119849914	-0.157996585	-0.253163297
PMP22	0.093313696	-0.184792348	0.057899429	0.025347368	0.017426162	-0.025217682	-0.18703047	-0.005903533	0.00481618	0.259299477
ELP4	-0.168367665	0.010135579	0.00488448	0.023786712	-0.132273551	-0.16278723	-0.057945394	-0.208400095	-0.076109455	0.096268739
PPARA	0.068894101	-0.031958328	0.272645906	0.247094462	0.222164798	0.410815237	0.486834322	0.34271795	0.444150538	0.184475852
CASP6	-0.066033652	0.125237656	0.225548829	0.274878704	0.257397297	0.409122759	0.406384046	0.237292126	0.447245603	0.231488098
KCNK13	-0.053492738	-0.079685471	0.020739902	0.241008959	0.238818273	0.097202089	-0.078587616	0.073496748	0.021519433	-0.001864903
GH2	-0.129401517	0.113390104	0.159511995	-0.075837752	-0.029731898	0.075667924	0.217415699	0.015038212	0.194427938	0.133995619
SCUBE3	-0.072249366	-0.054944402	0.004053471	-0.116385657	0.031595165	0.101533888	0.065819318	0.207548276	0.044431553	-0.033312845
RFC5	-0.19501949	-0.021918056	0.280539946	0.293278101	0.189633535	0.146883997	0.14984763	0.013804479	0.305226233	0.314115324
ADRA2A	0.149472646	0.047263991	0.024819019	0.161939164	0.139612292	0.169889047	0.158848755	0.144576848	0.139603204	-0.027866053
TFAP2D	-0.010686869	-0.048866486	-0.055692158	-0.097542235	-0.099487982	0.053782355	0.222547591	0.065574177	0.099079989	0.022541947
POLR2C	-0.144795715	0.108140792	0.009156977	0.091935036	0.060552374	-0.034520465	-0.12725684	-0.140891027	-0.03126	0.03012512
MAP2K1IP1	0.055608667	-0.259570856	0.234238734	0.175374468	0.228615411	0.221620029	0.075214386	0.167501872	0.2346154	0.155142355
TXNDC17	-0.087305921	-0.036325168	0.16212772	0.209046482	0.130079668	0.019855132	-0.072438249	-0.046227065	0.135413805	0.248538912
KIF1B	-0.046595123	0.164327149	0.07141844	-0.016503024	-0.098634112	-0.061909019	0.011083967	-0.113857009	-0.078415855	-0.0767301
AAA1	0.280657858	-0.05967918	0.136655895	0.056846457	0.021955695	0.068736734	0.10641263	0.022003296	0.120991157	0.130850846
DUSP23	-0.195724475	0.215431945	-0.109198476	-0.095029532	-0.27610128	-0.340440192	-0.229194074	-0.475521251	-0.182968769	0.11047472
APAF1	0.072975982	-0.177407342	0.150325611	0.436507462	0.423047867	0.351207937	0.225605646	0.228226533	0.216656997	-0.052558117
FAM71F1	-0.089894664	-0.042498154	-0.030067069	-0.105554565	-0.009517482	0.032599422	0.027641182	0.091675012	-0.01800676	-0.085741368
PBRM1	0.013705171	0.140741006	-0.056587495	-0.172962869	-0.162072422	-0.048239069	0.118107186	-0.036053625	-0.088018107	-0.166293664
KRTAP4-5	-0.098835375	0.064240336	-0.054834746	-0.148379885	-0.129614756	-0.04625566	0.018527758	-0.02025972	-0.020541103	-0.015904521
HBS1L	0.070819927	-0.156036182	-0.185475981	-0.04111265	-0.037199593	-0.170411651	-0.287109027	-0.056455341	-0.254240724	-0.174306471
WDR89	-0.059546647	0.232256477	-0.05407579	-0.140927014	-0.253501786	-0.04316749	0.114643913	-0.177198395	0.082999756	0.12953497
EPS8L1	-0.056444711	0.042188845	-0.07767243	-0.328572025	-0.345476833	-0.369431477	-0.253942152	-0.311425718	-0.281878088	-0.1102254
USP39	-0.116210904	0.155720034	-0.084167313	-0.036598311	-0.221093423	-0.357942436	-0.280731113	-0.417401704	-0.243952563	0.085875708
MED8	-0.045973062	0.340751484	0.171942128	0.205056828	0.117695028	0.221787252	0.322795503	0.073353893	0.238967715	0.01331153
CRELD1	-0.062547929	0.196292505	0.00876833	0.201383954	0.001892638	-0.076433783	-0.019915283	-0.228088922	0.058351221	0.12875355
STX3	-0.049617423	0.290508036	-0.311406311	0.00171515	0.05370187	-0.071830955	-0.139214178	-0.097604993	-0.302654111	-0.402067577
SEC61A1	-0.053899114	0.217115396	0.363154126	0.146858229	0.121778139	0.117927652	0.125817373	0.152336755	0.147466414	0.045727312
MFAP2	0.008469541	-0.065663266	-0.067559068	0.157307438	0.04047661	-0.148769346	-0.144637467	-0.175977321	-0.062162354	0.04959228
AR	-0.024739157	0.043059233	0.267560952	0.132627856	0.104803105	0.303434343	0.31172836	0.270269323	0.301159918	0.135572575
FPGS	-0.134264527	0.422757641	-0.015219845	0.108465799	0.01442467	0.105771204	0.179983011	-0.065369405	0.152359082	0.029458776
ADC	0.029756783	0.129870027	0.171121961	0.194426951	0.107138364	-0.024046078	-0.114391932	-0.074555937	0.048147025	0.173092526
CCL26	0.013145899	-0.064579954	-0.020519225	-0.061292742	0.062905522	-0.029914091	-0.082474529	0.089776963	-0.053894769	-0.032527472
TJP3	-0.043793369	0.444511088	0.06304155	0.172253872	-0.023489363	-0.001095553	-0.002126545	-0.153388395	0.093339015	0.13080279
MYCBP	-0.161431831	0.032238553	0.323222462	0.373314352	0.338878145	0.415330416	0.411725113	0.2204086	0.545288104	0.453191506
PRG3	-0.059087061	0.111206429	-0.118730609	-0.036915606	-0.167737711	-0.332907508	-0.241415599	-0.263741403	-0.260936834	-0.066573606
SGCG	0.020934095	-0.089727165	0.198571662	0.013559643	0.114655572	0.099792204	0.092982704	0.168067316	0.144312684	0.170263292
MAGEH1	0.046121952	-0.263274313	0.077324874	0.163575011	0.175369443	0.075530611	-0.084380835	0.084969689	0.0572834	0.098925029
GABRA2	-0.041390738	-0.028444483	-0.130171561	-0.194805342	-0.15369682	-0.105625221	0.02050801	-0.083483011	-0.061986184	-0.068461702
GALK2	0.075439604	0.171544542	0.194756475	0.160605388	0.167216133	0.432323757	0.499626792	0.210226479	0.461337604	0.172815637
LGALS3BP	-0.084932298	0.037546767	0.393873327	0.511691514	0.529327403	0.610079726	0.522879396	0.519301724	0.571139307	0.242765006
USP6NL	-0.07431935	-0.242020883	-0.184400529	-0.250769687	-0.106008022	-0.086006182	-0.21112362	0.072685702	-0.309783502	-0.377273321
WWP2	-0.024269508	0.11936752	-0.334873305	-0.329739163	-0.231114035	-0.167449531	-0.004500671	-0.130992292	-0.2849608	-0.392676478
EXOSC5	-0.123237206	-0.102644781	-0.3530619	-0.30482489	-0.162595531	-0.344235431	-0.538713801	-0.331916846	-0.494173674	-0.289989606
CDAN1	-0.03973502	-0.107724655	0.193281139	0.183794582	0.000412042	0.043501706	0.063049206	-0.009870872	0.182372871	0.255765233
PRMT1	0.019270089	-0.037632043	0.080417919	-0.13178118	-0.119090094	-0.045005921	0.074950951	-0.109541465	0.120498196	0.226212669
LAMP2	0.073148461	-0.032114422	0.187360418	0.290877875	0.305383031	0.30348763	0.171780747	0.221369098	0.342565432	0.30162829
BTF3	-0.174645067	0.23685414	0.035943113	-0.128298589	-0.213955234	-0.057202843	0.078491671	-0.210016317	0.025096306	0.01849698
BAG3	-0.117901696	0.290895818	-0.311658921	-0.163766343	-0.04206401	-0.104443877	-0.104463972	-0.093865736	-0.311300016	-0.437962606
MRAP	0.067821886	0.079779009	0.133707315	0.328127075	0.209249954	0.198320746	0.389340377	0.041305991	0.454495477	0.420046901
KCNJ15	-0.018187801	0.002228248	-0.20138129	0.025844512	0.074242998	0.125717937	0.187182326	0.162025578	0.052307344	-0.183141911
CNGA2	0.061762914	-0.475868483	0.146085872	0.121579539	0.237765441	0.270725856	0.265321957	0.317019059	0.267039099	0.151796927
PCDHAC2	-0.037410171	-0.005531109	-0.047101812	0.058086057	-0.060556856	-0.156666382	-0.111635613	-0.181706217	-0.107517131	-0.013387897
RUFY1	0.001174069	0.018160168	-0.005976347	0.039709602	0.018694613	-0.086411372	-0.309459963	-0.14852063	-0.139361934	-0.000719486
CSMD3	0.093927583	-0.158152895	0.131285972	0.243398678	0.296687247	0.367816465	0.297070077	0.344930483	0.341941498	0.179993347
STK19	-0.25223476	0.346215181	-0.327924628	-0.178110698	-0.267977479	-0.409626782	-0.278586095	-0.433869613	-0.342835152	-0.111841662
CCDC76	0.034574594	-0.309567179	-0.086231779	-0.009650196	0.005310023	-0.084882294	-0.095356406	-0.060107613	0.010630327	0.130493661
HOXD9	-0.18634162	-0.1386077	-0.249012047	-0.207865869	-0.229699614	-0.321685876	-0.23143797	-0.27571989	-0.290943717	-0.119138994
BCL11A	0.026868218	0.170859348	0.307102978	0.108395978	-0.036588228	0.105705699	0.267665806	0.012480889	0.284513606	0.280187043
ATP6V1C1	-0.120371648	-0.243002672	-0.331840443	-0.293886872	-0.129562915	-0.19039639	-0.250249007	-0.114830466	-0.375793757	-0.387468635
OLA1	-0.001844293	-0.09393022	-0.137584483	-0.01954933	-0.024181497	0.118497468	0.253534982	0.09926928	0.205464231	0.11613184
PCDH1	0.050422752	-0.114463841	-0.164334994	-0.012630528	-0.04625775	-0.142420159	-0.218445308	-0.094977997	-0.136485665	0.035870928
RAET1G	-0.077441839	0.056928526	0.218939047	-0.056021329	0.012365223	-0.023100711	-0.00443554	0.037698894	0.081057547	0.197118075
DNAJC3	0.085677203	0.05414949	0.372314653	0.199399984	0.294664376	0.331158282	0.198103292	0.247836767	0.206908197	-0.024602179
KIAA0355	-0.153519326	-0.003290215	-0.373279444	-0.380240109	-0.354707993	-0.387927218	-0.255000474	-0.235367989	-0.449876763	-0.316300687
LOC389832	-0.005813034	0.023145082	4.85E-05	-0.154064183	-0.148248527	-0.060275631	0.098942042	-0.019801811	0.026413869	0.056220288
PWWP2B	0.055797275	-0.022858337	0.066871306	0.138819052	0.098091242	0.125017318	0.128356453	0.132126165	0.215366288	0.198342669
FAM167B	0.041760709	0.067430713	0.142649049	0.266589176	0.131042382	0.041174203	-0.028935603	-0.014479141	0.073120159	0.121757408
SNAP29	0.054921148	-0.01444433	0.027304449	0.011030244	0.090495764	0.195207157	0.132602692	0.293692539	0.109320945	-0.074901975
SFRS15	0.119794096	0.134647024	-0.019479483	0.070111847	0.141580279	0.20519889	0.172513697	0.209173749	0.02467149	-0.22505122
ACSS3	0.153032266	-0.29485003	0.10717089	0.183604668	0.228844657	0.202837727	0.023857566	0.19862212	0.103034636	0.006429865
PPP1R14B	-0.056848068	0.107436573	0.04118356	0.023944357	-0.01288895	-0.272317868	-0.46389917	-0.294432227	-0.260743637	0.024368006
44531	-0.03993948	-0.059440795	0.020876738	0.0639543	0.081094672	0.140290011	0.222691807	0.098119782	0.165238472	0.076181768
MSN	0.109593677	0.248627697	0.198646886	0.276408659	0.246585137	0.217737364	0.27781608	0.13835251	0.185917674	0.006200365
FKBP10	0.018117429	-0.043422364	-0.208944587	-0.089253495	-0.045651504	-0.181326463	-0.263061093	-0.127979428	-0.32179674	-0.280211944
ISG20	-0.029835507	-0.080691412	-0.341254012	-0.031903904	0.156142057	-0.015238661	-0.147425437	0.092829785	-0.326521166	-0.488444709
C9orf98	-0.065316321	0.114557268	0.013841055	0.058466433	-0.056375666	-0.181508964	-0.246427138	-0.271259949	-0.087754664	0.15210141
GNAQ	0.075161661	-0.017503978	0.021890578	0.076008369	0.218125235	0.376839538	0.319752295	0.400287215	0.195458483	-0.128165396
ST7L	0.057809656	0.001371794	-0.249474007	-0.147870886	-0.116011883	-0.028664454	0.04622265	0.051187887	-0.030430692	-0.104331889
TCF1	0.123035775	-0.103788741	0.411476849	0.269008575	0.168724151	0.260649032	0.204225589	0.149574619	0.397232202	0.375189575
PPP1R15A	-0.054438803	0.109052142	-0.474616177	-0.451843348	-0.284148952	-0.337799109	-0.331753391	-0.174790386	-0.592826183	-0.605230153
ZBTB24	-0.032824895	0.051832003	-0.2257094	-0.240331965	-0.307275521	-0.323774342	-0.306028481	-0.308723318	-0.35349765	-0.189997968
BACH2	-0.14271998	0.246581244	-0.597648668	-0.457035369	-0.405726647	-0.523381996	-0.420272114	-0.453720021	-0.645512077	-0.506274395
APC2	0.024034858	0.035328652	-0.208110306	-0.240740004	-0.159995477	-0.167694831	-0.177086497	-0.055740676	-0.171435004	-0.074107469
MTMR2	0.065105068	-0.077453002	0.006704611	0.065848779	0.206041494	0.23190103	0.252377099	0.270121128	0.172625804	-0.054821996
Septin 3	-0.201973984	0.253316488	0.0049028	-0.128068504	-0.104967077	-0.01702933	0.10512454	-0.145491761	0.09391176	0.180604666
IL4I1	0.027382582	0.07854071	0.23475642	0.279594862	0.298616438	0.205045177	0.270302585	0.119027582	0.225434376	0.153559896
C1orf216	0.009876894	0.167755196	0.001102032	0.117231641	0.040670562	0.05292866	0.122481788	-0.056227365	-0.002775414	-0.123714319
CLP1	-0.005261026	-0.205035456	-0.328169017	-0.119851587	-0.010344139	-0.160654138	-0.350281588	-0.150211152	-0.313186751	-0.21294375
GPR152	-0.001306782	-0.005022255	-0.013825289	-0.053503396	0.01447498	0.014662163	0.077076153	0.058581221	0.063973298	0.089316321
MEP1A	-0.085811297	0.118993024	-0.078962189	0.129175617	-0.005930241	0.031466063	0.066429668	-0.097019524	0.053148622	0.023292189
RSPH9	-0.029826908	-0.035890473	-0.03710904	-0.101249442	-0.044403643	0.067647139	0.168163496	0.085407505	0.111723728	0.065808289
C7orf68	-0.026384236	-0.040343281	-0.235684654	-0.074860211	-0.097326868	-0.246210439	-0.361581087	-0.225503863	-0.313400474	-0.171982334
SLC34A1	-0.092877339	0.262394488	0.03398672	-0.117402776	-0.277108743	-0.163001742	-0.094866017	-0.245610477	-0.073519611	-0.032523
FLJ32658	0.002744982	-0.044302006	0.058221455	-0.126204862	-0.007024681	0.065040682	0.114029233	0.126838923	0.085271218	0.063558634
M6PRBP1	-0.064754876	-0.22555247	0.200353241	0.309235669	0.421955525	0.385373338	0.258212005	0.393113709	0.286821702	0.102121619
P2RY6	0.16015859	-0.103758725	0.313484119	0.448420636	0.389641661	0.369814286	0.254499678	0.228894933	0.41869961	0.279244281
UBXN11	0.028709417	0.03272277	-0.026234502	0.095708383	-0.000749633	-0.147533787	-0.202406621	-0.157819487	-0.117594194	-0.009663681
POLE4	-0.108529757	-0.006597424	0.268769603	0.249007194	0.21126431	0.139532288	-0.025472384	0.034447114	0.15541315	0.194958743
RNF44	-0.028508341	0.243604172	0.023076324	0.0726198	0.041870318	0.251009106	0.397875056	0.15073683	0.201538954	-0.090329597
MYH11	-0.084132427	0.006885198	-0.278449298	-0.349111787	-0.284825215	-0.308769424	-0.275566411	-0.158845541	-0.435022501	-0.410047305
HTR2C	-0.150042946	-0.253496662	0.073301549	-0.060636184	0.016342003	0.122498865	0.133550343	0.218967987	0.038604208	-0.127542904
UCHL3	-0.115791607	0.17722152	0.218609608	0.167210773	0.038691228	0.130117185	0.171999102	-0.052260701	0.244689756	0.215266556
CDH7	-0.019303064	0.019559834	0.082932106	-0.125866103	-0.127875742	-0.019046896	0.111250782	-0.056834962	0.082565238	0.129795972
MMRN1	-0.041850603	0.034455038	-0.541505909	-0.613700105	-0.521678917	-0.521380223	-0.419289587	-0.443696394	-0.571122461	-0.381652533
SFMBT2	0.066596147	-0.019433275	-0.084504644	-0.048600079	-0.088302761	-0.238359466	-0.261415675	-0.139266128	-0.275290264	-0.136806736
ARR3	0.178876221	-0.306043611	0.020748423	0.206502038	0.176941418	0.214803865	0.054829028	0.251327482	0.138086483	0.054167389
TCF20	-0.134121477	0.217282914	0.087762608	0.097809886	0.024939872	0.098179017	0.294059493	0.052675463	0.185441113	0.108959318
ZNF582	0.059607979	-0.223283564	0.041629382	0.073494024	0.056507252	0.03048383	-0.035844696	0.036466589	0.0415696	0.033644318
MATR3	0.004500834	0.246711128	0.048272033	-0.009458687	0.055343832	0.095537493	0.012805352	0.049480975	0.031301171	-0.099145533
SYF2	0.083144377	-0.218681233	-0.040132907	-0.027411857	-0.059582068	-0.066942245	-0.054881477	-0.09092921	-0.062396891	-0.023573526
ZNF529	0.103402362	-0.21154412	-0.47150245	-0.48584966	-0.298041037	-0.328129895	-0.375403411	-0.087053621	-0.543690139	-0.559012942
IFNA5	-0.110444677	-0.037841984	-0.03912685	-0.109176156	-0.099743997	0.07247056	0.203242511	0.048057543	0.114702073	0.051065751
LOC643923	-0.029604646	0.012862606	0.065707922	0.021802514	-0.052925209	-0.138841502	-0.013899113	-0.110885847	0.049528374	0.234369409
ACAA2	0.297664596	0.048637484	0.15447856	0.084659224	0.126997109	0.149320765	0.006060633	0.117317434	0.134652729	0.079889119
HCRTR1	-0.2062485	0.101420986	0.057943225	0.183491556	0.090612809	0.123737753	0.107919493	0.004194657	0.2386225	0.257796815
MTBP	0.03874802	-0.100346172	0.178094902	0.073741157	0.07409348	0.104806269	0.204245378	0.11165099	0.222722369	0.189500274
CREBL2	0.038885805	-0.060430904	-0.119062337	-0.01412774	-0.066441159	-0.152661276	-0.272328355	-0.152368085	-0.19744841	-0.104030997
PEX5	-0.033431579	-0.252867186	-0.197555118	-0.05576402	0.025196655	-0.131315535	-0.299102535	-0.067234304	-0.216954995	-0.117068197
TDRD6	0.040034487	-0.084200722	-0.160594649	0.032830627	-0.064083354	-0.066133944	-0.122509233	-0.02904322	-0.083111961	-0.063218799
C2orf43	0.03502498	-0.029914867	0.340925739	0.163481086	0.062142133	0.268071774	0.292039746	0.095759215	0.466250595	0.444323226
POPDC2	-0.097529771	0.192855704	0.025434033	0.166034223	-0.061970564	-0.133325214	-0.054305039	-0.218923975	0.005303605	0.121707117
H2BFWT	0.167125679	0.060526664	0.206437696	0.221689309	0.068169153	0.169327842	0.225497822	0.06524279	0.295831964	0.312793444
PDE12	0.104728338	-0.221181557	-0.289712913	-0.254254643	-0.023437137	-0.090072554	-0.250278176	0.052510098	-0.31150688	-0.332842892
ITGA8	0.042048651	-0.106838086	-0.188205137	-0.195959611	-0.112643578	-0.246485803	-0.236728135	-0.110209704	-0.268024985	-0.158963882
LEFTY1	0.185262567	0.26612074	0.485674078	0.349581122	0.195188683	0.188993122	0.234436534	0.134392987	0.46411003	0.53682884
CDH24	-0.15710668	0.132593846	0.033047555	0.09393072	-0.068531513	-0.333651077	-0.173083915	-0.407694409	-0.064605931	0.266298892
PPT2	0.058346374	-0.018704688	0.098274349	0.264519813	0.186702647	0.108105403	0.078115145	-0.047538703	0.246552442	0.357980851
LRPAP1	-0.113617825	0.022960084	0.021225018	0.071017414	0.043938864	-0.086262973	-0.244277982	-0.136532249	-0.151792243	-0.053258048
NGRN	-0.10270259	0.103582529	0.095940308	-0.122370423	-0.272789997	-0.264178491	-0.114824543	-0.292976896	-0.079879096	0.145267939
PPP4R4	-0.256144094	0.586482342	-0.405656704	-0.198786335	-0.29403921	-0.417959917	-0.328147302	-0.497671035	-0.451289916	-0.30543768
NPY2R	-0.173045939	0.079762428	0.07865999	-0.207303484	-0.107428874	0.094326166	0.202447025	0.054700006	0.085441754	-0.073789191
PSCD4	0.06329432	0.132110143	0.016764284	0.285053868	0.240730378	0.15795566	0.227011456	0.088858804	0.094210479	-0.099903502
TRRAP	-0.14259681	-0.009221733	-0.245970326	-0.227393079	-0.245380708	-0.419808409	-0.360163855	-0.360137112	-0.447244055	-0.248671391
GRIA2	0.056238475	-0.021876171	-0.156781975	-0.149949804	-0.094054818	-0.033495295	0.009892633	0.067361515	-0.085715772	-0.169486084
XAGE2	-0.108225295	-0.240969827	0.15258122	0.019736472	0.034851058	-0.049345835	-0.083092996	-0.051035284	0.03140766	0.213113427
C22orf40	0.02202765	0.116657322	0.291275426	0.247142051	0.114504684	0.015289531	-0.059761051	-0.071378673	0.133927235	0.243307961
BRUNOL4	0.009814276	0.125468656	0.163954744	0.200589449	0.145250849	0.077397648	0.180421199	-0.026370952	0.105850559	-0.03181474
GRINL1A	0.129298814	-0.279458764	0.018741007	0.153008238	0.202812376	0.109363715	-0.103272952	0.14425684	0.036054037	0.0198755
OMP	-0.066926775	-0.020385344	0.116655289	-0.051278676	-0.06506803	0.032341898	0.166753303	-0.008406252	0.179827739	0.139387587
SGK2	-0.07921217	0.194993319	0.377906556	0.537745376	0.426682505	0.414999111	0.500170328	0.165513465	0.568402768	0.396434736
CPSF4	-0.231616636	0.252850788	0.096539454	-0.019877689	-0.225530713	-0.248353405	-0.064880462	-0.367358532	-0.075429045	0.082867016
ARID1B	-0.041664485	0.203748769	0.122690998	0.167940447	0.105319364	0.189776898	0.159252591	0.10963618	0.130512961	-0.014844002
HSPA1B	-0.087447166	0.159028207	-0.325236705	-0.226297552	-0.060325554	-0.111980099	-0.219806223	-0.007522346	-0.373126512	-0.444671845
FAM108B1	-0.039017766	0.11599293	-0.061749179	-0.07789217	0.030076368	0.151638976	0.131988878	0.165433288	0.042888858	-0.098926881
BTNL3	0.088764499	-0.034155585	-0.123244666	-0.103274124	-0.035103449	0.059064259	0.177420826	0.02604299	0.100309334	0.043761197
MCOLN2	0.197732261	-0.43355187	0.000768459	0.097861474	0.276811578	0.327487495	0.193934803	0.393277977	0.121141675	-0.209040883
RPS27	0.269921669	-0.199902165	0.05223256	0.094030145	0.097393749	0.037561133	-0.201953994	0.130248027	-0.024331213	0.010398986
LY6H	0.121353387	0.069879142	-0.110932844	0.064759874	0.031119529	-0.0938758	-0.15841243	-0.056968336	-0.09387085	-0.008739385
LOC340069	-0.206566576	0.077039315	0.064292662	-0.095047882	-0.109478821	0.01765619	0.221031486	-0.025217792	0.07806049	-0.057257574
C3orf70	0.045987968	0.083564824	-0.088668037	-0.129568868	-0.029169307	0.155630968	0.255599826	0.189339743	0.075725269	-0.188038089
RPN1	0.072692146	-0.105860585	-0.07498947	-0.047113428	-0.049879123	-0.151741358	-0.197173037	-0.162963887	-0.095726853	0.122829991
USP50	-0.132759316	-0.08946041	-0.092100657	-0.121314632	-0.063809906	-0.010906002	0.138196256	0.062501763	0.060248079	0.030424753
PCNXL2	-0.002366833	-0.141163642	-0.035069902	-0.0500159	0.066500476	0.120290611	0.146829848	0.223503081	0.07195425	-0.054218618
ARRDC4	0.029321358	-0.308693957	-0.006124776	0.00748971	0.236537749	0.28787163	0.208992318	0.349726618	0.070763461	-0.18153864
ERC1	0.11998066	-0.0649068	0.054864698	0.165473626	0.147709894	0.148653464	-0.021225147	0.156972368	0.053373103	-0.04880497
GPR177	0.093750152	-0.341201332	-0.217696075	-0.109106344	0.066489097	-0.073009445	-0.294902619	0.092313839	-0.288246825	-0.313930826
CRAMP1L	-0.10049072	0.402614327	-0.37857409	-0.123841713	-0.199228236	-0.254680075	-0.074704259	-0.24937791	-0.321108723	-0.398867705
BMP5	0.064574336	-0.069647022	0.162664481	0.305863383	0.248414294	0.461565892	0.50534025	0.377915207	0.47455614	0.161323134
ATP5G2	-0.123798525	-0.005085516	0.363435445	0.048528349	-0.092500981	0.037851989	0.046391014	-0.041102551	0.200383691	0.311675567
CRLF3	0.03447334	-0.102989654	0.385587464	0.313380549	0.272071986	0.383083369	0.575534856	0.276946658	0.570804262	0.412701518
LIG3	-0.159178549	-0.028149649	-0.000764327	-0.011915365	0.101078343	0.013213606	-0.178883846	0.056500278	-0.142112516	-0.178863091
C15orf40	0.08009157	-0.163913484	0.000860023	0.10592599	0.074270561	-0.009293573	-0.183737338	-0.017294651	-0.050549028	0.007961386
C1orf43	0.077404716	-0.176955734	0.178556261	0.268588669	0.219673628	0.218337807	0.112441533	0.121212374	0.326774497	0.356989643
GABRB3	0.417780739	-0.074455743	0.133459776	0.39412781	0.40967798	0.571190281	0.4509772	0.442938677	0.463913924	0.082038052
PATZ1	0.03337994	-0.020071447	-0.173754185	0.004094762	-0.055810886	0.06723589	-0.013224588	0.05117318	0.035812574	-0.04363879
LIMK2	-0.075688783	0.173495799	-0.494300012	-0.276865799	-0.123280459	-0.295120123	-0.396567139	-0.187326209	-0.545985521	-0.518042261
CAMK2N2	0.142425626	0.174537722	-0.030269516	0.300251105	0.291360442	0.067138495	-0.068485012	0.146898069	-0.016617693	-0.022249029
LACTB2	0.099265801	-0.054536009	0.043435032	0.090009219	0.079424281	0.075539604	0.084353125	0.022408637	0.150498185	0.222909015
WWOX	-0.128279627	0.172104687	-0.101031552	0.118866872	0.039548767	-0.197538032	-0.172150605	-0.179133205	-0.191151551	-0.06164342
TSHR	0.020360376	0.29845509	-0.445218438	-0.363733195	-0.373515942	-0.247717436	-0.107095958	-0.230811472	-0.366541661	-0.47449132
CDCA2	0.00268451	-0.021705043	0.183446661	0.112918826	0.192091552	0.294108784	0.358774119	0.258533329	0.318791348	0.147913581
TCP1	0.042819141	0.124980303	0.107835958	0.091204602	0.151731783	0.311380139	0.215515169	0.192942397	0.262037342	0.0806838
DYRK1A	0.121900213	0.21604132	0.112428056	0.144066302	0.158721082	0.371488933	0.460232915	0.263464135	0.3002353	-0.034650335
LOC642181	0.041462968	0.187474573	0.245417848	0.280983616	0.169938256	0.184958136	0.176362567	0.153323589	0.262995486	0.230525917
RAB31	-0.015531781	0.114688615	-0.125969228	0.060026242	0.135226123	0.11684953	0.092866968	0.037978077	-0.066983924	-0.306288529
SYN1	0.076555769	-0.131625084	-0.068986949	-0.115332745	0.024931874	0.050934366	-0.09149026	0.127318337	-0.07432831	-0.126474835
GTPBP8	0.040806414	-0.07986698	-0.118306985	-0.066539912	-0.085215869	-0.138321487	-0.255051782	-0.130564696	-0.205107304	-0.123749486
GABBR2	0.298217565	-0.224869383	0.133677905	0.122283945	0.231599664	0.327695667	0.251393091	0.446598517	0.184916416	-0.091750779
STX1B	0.06960803	0.009435718	0.082110414	0.06119641	0.054870509	0.245191104	0.3721006	0.176501103	0.300007073	0.142773236
RDH13	-0.207090639	0.399783994	0.159925621	0.132374117	-0.004228515	-0.036643854	0.008861382	-0.206965573	0.09499992	0.234164929
ENPP5	0.363800792	-0.469306733	0.294647032	0.212981418	0.329870002	0.457689722	0.25683588	0.57956345	0.34545631	0.082948398
ATP6V1C2	0.153389252	0.1639468	0.186751042	-0.045917915	-0.071229603	-0.108983491	-0.099741406	-0.056728633	0.037176084	0.219530632
SLC7A3	-0.138892324	0.214242418	-0.111214926	0.295880109	0.125947119	-0.169049725	-0.116759886	-0.35042055	-0.013809925	0.173416996
PPP2R2B	0.120355982	-0.171381358	0.162907198	0.06145582	-0.009312151	0.03639249	0.203853862	-0.051952993	0.219644537	0.239555077
ATP2B3	0.055645639	0.041753463	-0.015303918	0.260305268	0.10686449	-0.060015313	-0.111081792	-0.140090458	0.022942581	0.132033934
ASPSCR1	-0.079158789	0.040051014	0.120894996	0.105499107	-0.02424986	-0.038093271	0.014392396	0.041232828	0.058132095	0.139190621
LOC650152	0.106687542	-0.13786773	-0.157937859	0.078374332	0.088822949	-0.056533584	-0.236635371	-0.036595528	-0.155918598	-0.116484431
HIPK1	0.158950556	0.208639179	0.132730096	0.011047557	-0.054038792	-0.090765217	-0.05267243	0.035047492	-0.066360322	0.066801404
SUCLA2	0.097662715	-0.099139251	0.277661571	0.256411737	0.315264876	0.47269607	0.378767273	0.342509789	0.449190904	0.200640012
PAQR4	0.11112074	-0.038129135	0.569285376	0.706042739	0.697827777	0.638849677	0.425906721	0.559778315	0.53716162	0.20093995
CSRP2	-0.186856676	-0.319449487	-0.047217226	-0.125246447	-0.056925514	-0.186042815	-0.294220154	-0.127501159	-0.134618583	0.116496229
WFDC1	-0.121981933	0.21247753	-0.107624981	-0.115089575	-0.257015367	-0.377085797	-0.315105364	-0.385013516	-0.263921941	0.03099003
TTC17	0.025254918	0.093304172	0.123459896	0.175836514	0.094860722	0.139858622	0.065503583	0.079808305	0.070973353	-0.005088401
C14orf11	0.013812197	-0.143290414	-0.064128925	0.089607288	0.122434164	0.078893139	-0.012098469	0.0251295	-0.000335078	-0.090403726
CAB39L	0.024046202	0.058036846	-0.262533689	-0.394431596	-0.270396631	-0.278077345	-0.179749755	-0.128791146	-0.273971413	-0.161135292
P2RX2	0.176301694	-0.152183921	0.060587373	-0.135019623	-0.173979356	-0.131263425	-0.069528664	-0.147721306	0.01535658	0.220611546
DDB2	0.491326065	-0.082831981	0.236258306	0.22865022	0.140366179	0.309343573	0.338097615	0.32709385	0.323351933	0.101631208
CLCN3	0.247186315	-0.245793251	0.36428317	0.047344522	0.050883764	0.311582985	0.254932436	0.333520479	0.346103139	0.180500499
PPPDE1	0.290465104	-0.11196751	-0.153831171	0.046005469	0.147260354	-0.143205153	-0.422059271	-0.075674974	-0.371347278	-0.328127955
INTS4	-0.090810845	0.111002572	-0.098489641	-0.078428939	-0.211578716	-0.252246075	-0.200263114	-0.315792559	-0.197320294	-0.029259151
ZC3H6	-0.019493115	-0.354538091	-0.106695461	-0.234196345	-0.154450764	-0.215972095	-0.29712012	-0.107731339	-0.267685433	-0.109273858
AMPD3	-0.021781023	0.000235422	0.052505242	-0.105893666	-0.149505292	-0.13253557	-0.209621201	-0.078907724	-0.094771739	0.068665262
ALG11	-0.00056663	0.078332028	0.208901715	0.272052605	0.336513775	0.546698966	0.564069548	0.438283048	0.478076417	0.081906366
RIN1	0.11508426	0.099832325	-0.123820868	-0.213365209	-0.194378571	-0.289758267	-0.272313074	-0.174895641	-0.32722048	-0.177268065
RHBDL1	-0.079749537	0.001825133	0.047132331	0.115404087	0.04269118	-0.080604745	-0.161439668	-0.074304681	-0.033428741	0.094612117
ZBTB8OS	-0.04726921	-0.205436885	0.044894108	0.102188785	0.069695286	0.129837287	0.048781815	0.074844625	0.138904842	0.070833365
NEK6	-0.101026938	0.233899397	0.177712137	0.11266613	0.051089731	0.027878764	0.098766901	-0.086442733	0.009768282	-0.027930691
RNH1	-0.086553528	0.292445762	0.204490764	0.314353831	0.236972957	0.180760099	0.131368184	0.030200081	0.218546638	0.2300238
CHRM4	-0.024265141	-0.069972484	-0.058024415	-0.163790286	-0.193322182	-0.243476376	-0.113072718	-0.209442506	-0.081006049	0.12214829
ELK4	0.010664448	0.196341936	-0.001667945	0.056761123	-0.031062778	-0.008748965	-0.105820003	-0.080400391	-0.120485049	-0.181400904
ACADL	0.258769452	-0.259091531	-0.177778351	-0.105506583	-0.130481017	-0.10104192	-0.087378609	-0.010237969	0.043252508	0.190762697
TRIM15	-0.018315893	-0.097639034	-0.507171061	-0.41784461	-0.22250764	-0.354868662	-0.407953197	-0.192062355	-0.58964359	-0.545409502
PTPRE	-0.108080986	0.168798565	-0.067770544	0.094376167	0.09430016	0.021167443	0.009951294	-0.032706175	-0.024347909	-0.058409838
LOC284296	-0.102129097	0.048325053	-0.119505649	0.15719021	0.050534389	-0.148421365	-0.214327837	-0.221469434	-0.024130591	0.233392248
MGC5139	0.097944326	0.143151709	0.332177018	0.342645321	0.249262869	0.354836092	0.310676576	0.122016141	0.41487981	0.240927047
TOE1	-0.113722844	-0.060133153	-0.001286177	0.002157242	-0.036708066	-0.075375338	-0.129038616	-0.056237657	-0.042996388	0.024966725
CCIN	-0.057802598	-0.027800298	0.181194577	-0.103074046	0.035550896	-0.038411035	-0.063969047	-0.009631294	-0.055742386	-0.017813219
PRR22	0.088167716	0.097348796	-0.1246833	-0.270259876	-0.207966799	-0.212600824	-0.076022701	-0.097248347	-0.177079392	-0.111940259
ADAMTS12	0.115208527	0.082962081	0.157013009	-0.009140763	-0.011389174	-0.034406717	-0.171896888	0.030258524	-0.10943937	-0.070168638
GTDC1	-0.04634328	0.09933985	-0.04452074	-0.140973191	-0.116142539	0.01381447	0.172957292	-0.017386346	0.057083611	-0.013770659
GAD1	0.052832023	-0.1128398	-0.009951824	-0.181713886	-0.082239183	0.047879312	0.09560911	0.083788611	0.01532356	-0.081180652
OR11G2	-0.070204333	0.04680611	-0.063722891	-0.127952947	-0.110048559	-0.120954135	0.009258265	-0.085387824	-0.098341148	-0.06265463
PER3	0.016039774	-0.126374803	-0.130212731	-0.081169866	-0.131005862	-0.231196601	-0.378703449	-0.17956144	-0.238431191	0.023893631
AMH	-0.022389758	0.06164848	-0.121252893	-0.121344198	-0.088182817	-0.039197863	-0.048913461	-0.008943809	-0.100965157	-0.069486237
RPS6KC1	0.040826762	0.13891096	0.452973579	0.242453517	0.227176491	0.228828226	0.165871857	0.231381839	0.289254461	0.182299413
RFWD2	-0.130044864	-0.093811507	-0.05173117	0.099544325	0.045183388	-0.10996724	-0.147290967	-0.153233331	-0.056741199	0.119276354
TREH	0.254304038	-0.023458835	0.041015824	0.147102296	0.029214488	-0.028548107	-0.086104258	0.044671774	-0.023298744	-0.007846488
FLJ25328	0.040717744	0.1902518	-0.037954384	-0.106163221	-0.033798989	-0.007216614	0.099465087	0.00919023	-0.080996394	-0.231778218
ZMAT1	-0.11471544	-0.039635892	-0.151995696	-0.149249731	-0.174438345	-0.103906347	0.108093829	-0.032865466	-0.020738087	-0.057001703
FAM26A	-0.108574429	-0.067384857	0.125203486	-0.032083266	0.118103395	0.112404563	0.082399082	0.101841711	0.016232991	-0.086824517
MRPL30	-0.081237065	-0.186254163	0.202491407	0.235318985	0.288086322	0.284662564	0.180443486	0.167879639	0.368266169	0.356547182
WFDC10B	0.03604995	-0.158327708	-0.008701444	-0.188824389	-0.120565408	-0.004754792	0.069687992	0.07860465	0.001198016	-0.063948296
NFATC2	-0.051288582	0.141733992	-0.373763259	-0.171174451	-0.053075377	-0.179770475	-0.203995992	-0.094351634	-0.422105993	-0.496648987
ATF3	0.084939213	0.086892294	-0.021220667	0.083097592	-0.069604201	-0.083281694	0.099732147	-0.117302341	0.038338514	0.078583468
PPP2R2C	0.016166909	0.205548961	-0.00474288	-0.096491561	-0.178262616	-0.374275741	-0.345118311	-0.358921051	-0.210656604	0.190357749
SH3RF2	0.045483536	-0.219109958	-0.045333914	-0.015150209	-0.038573238	0.081265926	0.045529862	0.109758668	0.032209855	-0.040623674
GON4L	-0.098757312	-0.251710084	-0.215713032	-0.221270673	-0.151648675	-0.339474294	-0.467687828	-0.149004043	-0.403128431	-0.212698491
TMF1	-0.024181236	0.140560924	-0.008967534	0.045837687	0.169467329	0.277003785	0.327212591	0.211256658	0.199715701	-0.044048604
USP31	-0.024397911	0.331672329	-0.066369569	-0.099654816	-0.096698192	0.138919072	0.196918906	0.042620487	0.048948956	-0.124438958
SIAH1	-0.142825086	-0.077922092	-0.02712869	0.07519286	0.109778868	-0.012967879	-0.154205159	-0.071308801	-0.075801286	-0.002241937
NDUFB8	-0.37092973	0.184180035	-0.097564669	-0.266821835	-0.393121136	-0.326053081	-0.201807857	-0.434880403	-0.226136427	0.000717702
TRIP4	-0.040317373	0.037630141	-0.001212382	0.095485155	0.06026062	0.038216457	0.041475388	-0.12592588	0.113482242	0.152220606
NR4A1	-0.038755622	0.029464603	-0.442960294	-0.360991972	-0.27014791	-0.346689904	-0.336224695	-0.13459308	-0.533345107	-0.477911354
ZBTB41	0.116492303	-0.360053494	0.091363481	0.122963356	0.221443471	0.210321406	-0.005619491	0.243070453	0.081675409	-0.031002954
CLDN14	0.026074277	-0.1327266	-0.024293242	-0.134329824	-0.010953783	0.057867877	0.061963139	0.16654648	0.008433681	-0.076451707
CSF2RA	-0.015355253	0.248700566	-0.203961192	-0.147834372	-0.134075509	-0.080670999	0.092891008	-0.078391493	-0.120472648	-0.20964035
CLCF1	-0.024238801	0.082904054	-0.417349227	-0.343346207	-0.210982682	-0.278266221	-0.238313984	-0.150987747	-0.413559059	-0.392756378
SPAM1	0.081873303	-0.274301578	-0.005195022	0.02755206	0.104015825	0.133721282	0.134450877	0.200125558	0.158532939	0.105017575
SHMT2	0.160238675	-0.075849781	-0.023680822	0.024783675	-0.104369339	-0.166883692	-0.130808413	-0.147818682	-0.060443302	0.111806458
HLA-DQB1	0.217485801	0.021496546	0.070720709	0.143973258	0.063253609	0.19192237	0.182384982	0.188539524	0.181008423	0.027511671
ZNF224	-0.037049215	0.15563134	0.080219066	0.266973969	0.241031229	0.309655347	0.364530632	0.247091157	0.333408867	0.076453241
TLE6	-0.183698191	0.300450341	0.002331188	0.06956979	-0.068976691	-0.23380125	-0.260817672	-0.29459691	-0.179691038	0.012193519
JRK	0.138441713	-0.103930002	0.193710442	0.166448417	0.137232347	0.342493425	0.452249465	0.239804185	0.409010871	0.184769844
XKR4	0.083100669	-0.038455555	-0.472920903	-0.443912867	-0.342111121	-0.420549368	-0.380555695	-0.179893384	-0.522322425	-0.40559743
KLHDC7B	0.054379556	-0.001175049	0.048300941	-0.016717063	-0.040905608	-0.033523897	0.11150283	-0.038148541	0.130860719	0.176197979
PKP4	0.16010717	-0.032370969	0.443623041	0.421852811	0.371885366	0.59878807	0.584688268	0.475020619	0.649151045	0.346748349
ZNF334	0.035906949	0.055970701	-0.051529326	0.095142528	-0.019125591	0.096978164	0.335311183	-0.036875891	0.266056182	0.238067434
SPTBN1	-0.06885308	0.146619076	-0.148142216	-0.234243831	-0.203623033	-0.225174215	-0.214330217	-0.122640013	-0.343942086	-0.299592777
SRM	-0.097778268	0.216621704	-0.220561922	-0.146666264	-0.035550238	-0.022778327	-0.087603945	-0.092525932	-0.196500046	-0.218357587
Septin 6	0.208660982	-0.168930023	0.295945623	0.312966436	0.28189662	0.544318267	0.675968424	0.435799321	0.576098312	0.176793233
C17orf81	-0.005636844	-0.09599109	0.045714964	0.100952869	0.024900127	-0.059111683	-0.121992284	-0.078637564	0.022122743	0.17152122
CHRND	-0.055847591	0.213402118	0.06052898	-0.112883421	-0.103368973	-0.184620809	-0.198776009	-0.203767873	-0.090871096	0.15971183
CXorf65	-0.091094753	0.194744538	-0.016701397	0.134849668	-0.045929853	-0.135665718	-0.097546216	-0.19801971	-0.071098062	-0.032485153
CDC14B	-0.103103861	-0.125625911	-0.182071376	-0.064687046	-0.013142775	-0.061422463	-0.119294495	-0.060387236	-0.178874604	-0.264137594
JUB	0.091086597	-0.002881508	0.435200392	0.476502118	0.419148448	0.494659403	0.431049954	0.355951096	0.543252895	0.362822674
GRIK2	0.037718577	-0.126824661	-0.25935931	-0.18494906	-0.16950747	-0.064118493	0.008852131	-0.01314649	-0.06246619	-0.110270476
LSM12	0.130032923	-0.09329588	0.167803791	0.213716848	0.235749684	0.122301714	-0.037106146	0.108450528	0.086306834	0.058499751
C3orf63	0.054505335	-0.219218065	0.324678414	0.29505338	0.307291506	0.48536737	0.478767421	0.406118384	0.539247557	0.380911449
MAGED2	0.038994557	0.067586812	0.027130966	0.156530886	0.046217835	-0.004764612	-0.094545715	-0.087639397	0.023940218	0.084192625
THAP6	0.112427582	-0.1370451	0.213101489	0.289722709	0.258702963	0.306547597	0.154205523	0.234503028	0.311924188	0.239373533
RFNG	-0.075853743	0.215012741	0.277090824	0.322649664	0.23846776	0.391385525	0.445272068	0.241204255	0.500793282	0.315453853
ATP11C	-0.048555921	0.226272105	0.388682675	0.204576089	0.017656054	0.124162889	0.304680735	0.028223949	0.371791142	0.367873923
NUP43	0.270935189	-0.378566221	0.251937392	0.165836104	0.184291952	0.189142184	0.029569441	0.23301219	0.243446661	0.276355517
ACSM1	0.244540261	-0.265384528	0.335000649	0.473786091	0.575080432	0.642860615	0.393366178	0.650091152	0.424830741	-0.059059548
FLOT1	0.074356687	0.033798507	-0.147267837	-0.174723792	-0.163222171	-0.138094897	-0.101873809	-0.147237004	-0.240159349	-0.225302632
GRAMD2	-0.054768138	0.181967933	-0.105881844	0.038756871	-0.088408652	-0.135944857	-0.06772828	-0.109054901	-0.086012706	0.010899889
DGKA	0.198795588	0.178040388	-0.095313942	0.213644263	0.082392625	-0.051340797	0.001890172	-0.120603336	-0.000457743	-0.000353841
ARF1	0.073894	0.036265558	0.108340937	0.251338037	0.15007569	0.04207564	-0.030472851	-0.050289002	0.126342794	0.247319716
TAC4	0.047979648	-0.006415797	-0.007932817	0.088170016	0.091739291	0.017668481	0.073609369	0.048853276	0.05726338	0.077031309
ZBTB45	0.022758633	-0.090224774	-0.007654255	0.081955854	0.045886393	-0.070264636	-0.220083812	-0.021742999	-0.120812946	-0.028109357
RBM34	0.053379871	-0.127012951	-0.238454836	-0.19193633	-0.138091274	-0.113244975	-0.210877076	-0.097159467	-0.156602467	-0.126445126
LOC729905	-0.117974861	0.310281646	0.078982143	0.220395037	0.111134712	0.225851548	0.257729379	0.026414181	0.267857098	0.127748501
PFDN6	0.150124311	-0.100217621	-0.127475241	-0.101815101	-0.08921355	-0.054568414	-0.142314884	-0.001759889	-0.119997096	-0.136719863
SH3GL2	-0.08203765	-0.254207792	-0.135675382	-0.144216747	-0.13113421	-0.021604564	0.007520385	0.012934123	-0.001931682	0.034872545
ARRDC1	-0.189476999	0.265939999	0.062870114	0.238247017	0.170156655	0.036207726	-0.109453611	-0.067618568	0.036352308	0.085538568
B4GALT4	0.012035313	-0.139266316	0.027136919	0.054519417	0.020135469	-0.024544353	-0.144479334	0.023859882	-0.104275036	-0.019047761
LOC389827	0.088151291	0.075121663	-0.037302004	-0.088964853	-0.094026509	-0.14978675	0.01396564	-0.094354681	-0.067291747	-0.033794051
POLR2J3	-0.047038407	0.199821177	-0.000129043	0.035251688	-0.05240548	0.0564845	0.00825713	-0.087666698	0.173505866	0.209997896
KIAA0408	-0.30701361	-0.14592587	-0.058379134	0.011888372	0.043105727	-0.108221637	-0.228448555	-0.122706792	-0.117168211	0.01775465
TTTY18	-0.000934304	0.457414544	-0.052499852	0.010529088	-0.141539925	-0.228207932	0.025880673	-0.285623965	0.019191954	0.17183044
LEPROT	0.20085485	-0.188254581	-0.058471597	0.232865423	0.197504792	0.100289244	0.067909912	0.14400916	0.134508924	0.125839546
DIAPH1	0.190965358	0.127678389	0.305329256	0.137134339	0.090719164	0.303633119	0.384923984	0.224878275	0.291602393	0.081891144
FSTL4	-0.032604661	-0.123685619	-0.298208908	-0.030515628	-0.012376958	-0.190931807	-0.308933663	-0.105620687	-0.255322723	-0.158638129
APOBEC3D	-0.055184312	0.084611805	0.042553337	-0.038043152	-0.147145539	-0.248338894	-0.178121957	-0.255878891	-0.053133114	0.230088774
MAFA	0.005714768	0.072528537	-0.157962169	-0.134286116	-0.082999838	-0.251447556	-0.315443314	-0.223799569	-0.326699772	-0.162501751
CD151	0.046539844	0.122059966	0.347137306	0.405326346	0.425353796	0.563342605	0.527699861	0.414395241	0.564670263	0.253842272
FAM18B	0.059832199	-0.047580513	-0.180593495	0.010425126	0.081120618	0.036414258	0.111451555	-0.083979025	0.138564003	0.181217093
C2orf42	-0.013358756	-0.075634749	0.017619394	0.068098628	0.023454483	-0.019939861	-0.095963778	0.041390332	0.060707054	0.235344001
C1orf53	-0.131306163	0.121481662	0.170069895	0.077753477	-0.09539302	-0.147662655	-0.18080425	-0.261907399	0.03965311	0.298007596
FLVCR1	-0.014782267	0.038887549	-0.117210923	0.032042942	-0.046249828	-0.126561734	-0.138202469	-0.175626029	-0.141496844	-0.105790935
DDIT4	0.038795928	0.400958577	0.321953866	0.21149536	-0.022669804	-0.001167275	0.237336769	-0.158253863	0.2478614	0.303976494
FSHR	-0.031098869	-0.02067273	-0.011391334	-0.138009477	-0.097831352	0.00991483	0.083852642	0.007560167	0.057119507	0.090908282
C20orf85	-0.007735093	0.214314465	-0.027856993	-0.091402229	-0.126468403	-0.267117623	-0.265518949	-0.252439881	-0.178418233	0.092090091
TBC1D7	-0.135439429	-0.017759391	0.304548353	0.306959413	0.130087643	0.072060637	0.084363392	-0.045742613	0.221161951	0.360912666
ARSD	0.019117491	-0.508370734	0.080447781	0.090455504	0.21947866	0.156539626	-0.037975501	0.263483109	-0.001033538	-0.091494817
LZIC	0.055958078	-0.168785382	0.4872235	0.313872641	0.18355268	0.220584611	0.230789262	0.163729154	0.411128983	0.42515892
LILRA3	0.031509536	-0.056608038	-0.067192703	0.099372008	0.14208871	0.057094292	0.148363376	0.115888953	0.060403889	-0.01718666
ZMYM2	-0.149913845	-0.007435197	0.152495999	0.268335438	0.236795526	0.021780137	-0.046032877	-0.02065386	0.168704418	0.33099985
TRPM8	0.014585117	0.086549259	0.240159945	0.351291639	0.163984063	0.1187147	0.160191927	0.029842876	0.354269679	0.476064718
BANK1	0.011238424	-0.147068698	0.073371669	0.186368995	0.13977284	0.148123089	0.014038068	0.080609151	0.174200153	0.175258677
SMEK2	0.079683944	-0.271237204	0.038169983	0.150807252	0.201135333	0.064099067	-0.190442886	0.099279629	-0.007544181	0.043243301
DET1	-0.039409447	0.056595492	0.315441578	0.323044488	0.142469328	0.285268765	0.355867044	0.106425682	0.45270746	0.41170263
VCL	0.23301035	-0.192228635	-0.076626982	-0.005759238	0.096565601	0.017139854	-0.080437455	0.225965393	-0.169014507	-0.291078025
IL21R	-0.130608041	0.086889521	0.18282701	0.012751062	0.016037683	0.025007387	0.110133948	0.045626684	0.193132894	0.304361062
IRAK3	-0.082405579	0.126876735	-0.603793141	-0.44334366	-0.312698246	-0.377554688	-0.313744119	-0.22887766	-0.606924491	-0.621610353
G6PC2	-0.040857906	-0.06526905	0.047948095	-0.183598582	-0.091805366	0.084248756	0.154706382	0.078628115	0.123859022	0.115449657
LGALS7	0.063166622	0.153633446	0.344919907	0.009013571	-0.101877318	-0.177433131	-0.160875162	-0.170715713	-0.007995519	0.267351778
TFDP1	0.065848822	0.25969551	0.233056486	0.120155953	0.071040289	0.093833749	0.129245353	-0.029560547	0.092792257	-0.04834723
FOLR1	0.012528212	0.089925835	-0.052496795	-0.148648564	-0.087782667	-0.08141801	-0.000789598	-0.026883595	-0.028636229	0.01929652
C17orf103	-0.044314044	0.174267313	0.237284136	0.249114614	0.199229014	0.31029482	0.333948091	0.203990247	0.292059078	0.05973986
VIL1	0.081677081	-0.410255188	-0.540003879	-0.579460834	-0.366752409	-0.228477312	-0.321510237	-0.080154176	-0.488935823	-0.507476154
FAM129B	0.084509928	-0.04249746	0.292370906	0.315033559	0.425033548	0.406151208	0.24829796	0.494014007	0.292096852	0.082215921
JMJD2C	0.042227993	0.030425576	-0.156759034	-0.045779502	-0.103495444	-0.238487306	-0.299686779	-0.226409982	-0.327141237	-0.258259055
CENPJ	-0.141557781	-0.139551662	-0.179432285	0.117546352	0.110218499	-0.064839071	-0.167216279	0.045719244	-0.180208533	-0.203393635
NR3C2	-0.042802849	0.05799166	0.052859423	0.070847969	-0.046151375	-0.121323213	-0.154594049	-0.184036307	-0.067152177	0.038091965
MTL5	0.106896246	-0.089155174	0.226564351	-0.025294245	0.070796284	0.09280452	0.016093565	0.130505229	0.089647086	0.133457546
WNT5B	0.086644797	-0.121183347	-0.027552554	-0.177081062	-0.028361262	0.029170621	0.032541611	0.158343615	-0.048626177	-0.123408296
HIGD1A	0.177903629	0.042265172	0.023933705	0.245502107	0.194604046	0.207139628	0.179253315	0.145465773	0.305023539	0.30247879
RAPGEF4	-0.080039207	-0.226336079	-0.100153041	0.106889476	0.101098408	0.116525872	0.099201177	0.123922912	0.097685374	0.112215249
CTF1	0.233018488	-0.044474062	-0.197351894	-0.145431626	-0.097249359	-0.049257956	-0.219403633	-0.004937202	-0.139291894	-0.034362024
PREX2	0.043327236	0.12068866	-0.081475495	-0.106719377	-0.095993002	-0.08832152	-0.136604177	-0.122359327	-0.245235222	-0.304562662
PRRG4	0.054722784	0.172761983	0.404709268	0.027530222	-0.049331377	0.040798497	-0.030220892	0.058758412	0.075656897	0.091637711
TNFRSF6B	0.103567373	0.297734147	0.032281149	0.070225942	-0.051144193	-0.068363367	0.089962923	-0.124143588	0.152290855	0.233435306
ANKRD12	-0.120078575	0.000894764	-0.27216789	-0.282837452	-0.289667248	-0.491333216	-0.502893432	-0.443879377	-0.508129613	-0.198599554
OR52A5	0.092051725	0.035699602	-0.101827548	-0.06021784	-0.091072995	0.018072302	0.163258357	0.01952407	0.097723033	0.026382801
CNTN1	0.007343488	0.295044449	0.098788485	0.087086557	-0.061356566	-0.057742443	-0.006776353	-0.156876302	-0.017092493	0.003509892
CSF2	-0.194125761	0.208706488	0.084285943	0.294767854	0.123558752	-0.007241667	0.026921304	-0.145282458	0.164752011	0.314474261
APEX1	-0.020813737	0.187248328	0.106069715	0.130082434	-0.000444893	0.009978582	0.024177719	-0.10372696	0.075041167	0.034055053
MEF2A	0.06299881	0.160959718	-0.018386009	-0.06232587	0.041585183	0.156005338	0.208554204	0.1733698	0.038790278	-0.190553696
PI15	-0.121856188	-0.108398331	-0.121653212	-0.178167593	-0.084684932	0.001167365	0.04455507	0.021676851	-0.015923709	-0.056980822
CYLC2	0.055006301	0.308204706	-0.10423664	0.103314144	-0.122987087	-0.169628568	-0.068337608	-0.22229221	0.028718465	0.204726993
SGSM1	0.132494964	0.15673853	0.082059845	0.24861383	0.026869908	0.024263864	0.170362947	-0.19012476	0.268000295	0.373831936
CAMTA1	-0.12236338	0.250907947	-0.383627173	-0.348321712	-0.408790906	-0.250044747	-0.020909465	-0.306948082	-0.267658238	-0.256385092
C14orf156	-0.084174935	0.18269416	0.166369809	0.249892011	0.088075799	0.095300446	0.129465695	-0.060051766	0.288551342	0.387707033
UGCGL1	0.239152398	-0.101597564	0.056054674	0.166244714	0.175199269	0.005739932	0.076412436	0.054977563	0.024916119	-0.026028275
ESRRG	0.340099099	-0.172868499	0.151951646	0.140318127	0.158462265	0.269006713	0.07776003	0.203416151	0.182468707	0.050071796
METTL6	-0.127798689	0.306099613	0.195827156	0.356104912	0.135983669	0.279492988	0.459636582	0.02675999	0.45912429	0.318806905
DLK2	0.071888048	-0.019828982	-0.050717171	-0.053157753	-0.164497097	-0.251286351	-0.213359515	-0.183017389	-0.097216416	0.208714272
SCRN2	-0.026509284	0.048639111	0.09484127	0.199827283	0.112531614	0.02867272	-0.087983544	-0.04433397	0.020459797	0.062940464
ZNF326	-0.090070139	0.303460575	-0.081296444	0.109667986	0.135009733	0.013242163	-0.096285584	-0.040628957	-0.074327144	-0.134136094
KLF7	-4.94E-05	0.061264169	-0.112787531	0.076029501	-0.013027264	-0.124938045	-0.146442655	-0.136636764	-0.137900195	-0.060366397
BTK	0.110715879	-0.409811297	0.014692309	0.149206523	0.290758194	0.296528539	0.13053396	0.345041504	0.113134402	-0.173250956
LARGE	0.127500346	-0.250911604	-0.213707587	-0.383950824	-0.273807933	-0.16821603	-0.274885805	0.075731045	-0.390402056	-0.441076643
AGPAT5	-0.165784985	0.438994971	0.180586271	0.148966514	-0.046993276	0.064841804	0.257756411	-0.151850341	0.240346733	0.268320802
WDR92	-0.032358575	0.160547326	0.458563194	0.394586007	0.215274958	0.431371673	0.578015513	0.216102947	0.657581471	0.507192063
HTR3A	0.130030525	-0.093325137	-0.013495413	-0.149010825	-0.071031609	0.033903459	0.02926458	0.075220061	-0.000195642	-0.110977312
GUCA1A	-0.151219915	0.127810844	0.030412618	0.046272288	-0.082558238	-0.051920839	-0.031053484	-0.194105935	0.128912044	0.329093597
FLJ43860	0.007176688	0.047312761	-0.00752018	-0.087212009	-0.168666223	-0.160632556	-0.156215778	-0.160907894	-0.050646273	0.172079397
TCP11	0.016930377	-0.026405343	0.054178367	-0.089238439	-0.23374194	-0.176907977	0.038431453	-0.176771034	0.110928498	0.389991202
LOC387720	-0.031941125	-0.108729008	0.144724685	0.005054138	0.044754367	0.113385475	0.230466199	0.134207637	0.270224923	0.313415889
MATN4	-0.113978577	0.22999614	-0.035293537	-0.230699185	-0.197062049	-0.156960838	-0.018816177	-0.064403376	-0.163761199	-0.170695187
ISY1	0.002531314	0.203420393	-0.033695695	0.045117898	0.03872847	0.132836445	0.099845207	-0.012906153	0.075408006	-0.085271092
RCN2	0.215589311	-0.453668665	0.16853076	0.149027698	0.26238826	0.139020659	-0.153231765	0.283510642	0.045024085	0.046023748
SGPP2	0.052533136	0.273696083	0.058128359	0.156443671	-0.023707554	-0.218560197	-0.189829998	-0.23500144	-0.107119311	0.175042894
CPT1B	-0.137302903	0.277951878	0.073219559	0.227686201	0.077661212	0.056203926	0.104725345	-0.110377884	0.152951156	0.106165727
MANEAL	0.121212619	-0.201487882	0.23684538	0.141928981	0.162708473	0.127740342	-0.048297968	0.202168804	0.031824263	-0.084042477
SLC22A12	0.057813978	-0.095159988	0.115250187	0.032556528	0.075746267	-0.012420737	0.049176032	0.051244206	0.084072929	0.175611928
PRKCZ	0.039090089	-0.072070199	0.066831989	-0.025036733	-0.005685347	-0.077264748	0.124750691	-0.088578392	0.059239075	0.162582025
TBC1D13	-0.059822333	-0.011710176	0.460868256	0.417877396	0.270532634	0.359374927	0.398674618	0.260747388	0.522067384	0.453923101
PTK7	0.13459232	-0.130465521	0.021916107	-0.10595414	0.035126551	-0.001805458	-0.090176839	0.151378682	-0.07168721	-0.054657494
SP3	-0.164005653	0.073260226	0.02778312	0.132590014	0.156514525	0.052133172	-0.126118393	-0.017870022	0.025556294	0.076678116
ORMDL3	-0.155908418	0.28799434	0.183880437	0.12798027	-0.093415882	-0.068425771	0.038712122	-0.155388873	0.069670062	0.204989616
C5orf34	-0.065641902	-0.056831673	0.188379207	0.151154022	0.150983774	0.262978613	0.411988126	0.21296857	0.402536054	0.277404505
WNT11	-0.229710055	0.101137513	-0.202600331	-0.22571397	-0.277066539	-0.392249649	-0.31051401	-0.317590454	-0.320330472	-0.063744329
ZNF248	0.052227281	-0.106646534	0.25208103	0.269514616	0.234300506	0.17340182	0.028049333	0.124833641	0.165344925	0.095476132
RANGAP1	0.10054787	0.24692274	-0.286957694	-0.309722245	-0.247623992	-0.222175905	-0.226533991	-0.153933195	-0.417086366	-0.451683163
PAH	0.376737752	-0.207028248	-0.183900421	0.051748458	0.073976352	0.092340231	-0.053342234	0.236461941	-0.004749803	-0.076954681
DCTN2	0.095077949	0.219056504	0.269334385	0.113054579	-0.081646092	0.008551017	0.139925665	-0.109271668	0.139414751	0.168610702
PARP6	0.364883544	-0.074046934	0.099534074	0.26328049	0.125662846	0.295030863	0.347350551	0.153037747	0.34879291	0.176461985
MDP1	-0.008262551	-0.036229295	-0.035335891	0.030754126	-0.063909255	-0.120886495	-0.188796001	-0.186570901	-0.082000508	0.040675177
GDF1	-0.237977117	0.134750732	-0.015219944	0.155426325	0.065830069	-0.021517993	0.070537576	-0.109906638	0.056842749	0.027410282
IL28A	0.030009956	-0.024322419	0.06304362	-0.062261068	0.032397563	0.076175316	0.113718077	0.113891757	0.114766364	0.093564168
RABL3	-0.065631754	0.044427352	0.448925093	0.44234552	0.4195173	0.520406916	0.460075167	0.356953123	0.620601703	0.419440547
VPS33A	0.021554566	0.002933398	0.003853262	0.075921064	0.018573743	-0.078000591	-0.14864308	-0.091385148	-0.065151889	0.038646915
CCDC59	-0.017881525	0.025989098	-0.524759984	-0.46213553	-0.284905725	-0.383543421	-0.499808162	-0.29432988	-0.611757831	-0.549113735
ANXA7	0.049203543	-0.236037572	-0.305180845	-0.263247863	-0.115410457	-0.222552515	-0.375459896	0.014511711	-0.420697761	-0.359658117
CNNM3	0.112928512	-0.12087341	0.138946378	0.041642588	-0.019732071	-0.052479149	-0.106289474	0.026555006	-0.031525962	0.023907321
PDSS2	-0.018291518	0.120167508	0.478291845	0.447533523	0.310126953	0.325946073	0.329999086	0.134202226	0.511569222	0.489842032
DNAJA3	0.132372364	0.083139474	0.016450479	0.022285179	0.15734143	0.196756409	0.049054542	0.128423488	0.010624384	-0.235634962
ZNF358	-0.032638636	-0.232973368	-0.080379106	0.040314962	0.071595192	0.029311458	-0.115543288	0.124011118	-0.00618563	0.056101601
MX1	-0.098712809	-0.047613707	0.132723739	0.141979234	0.194061157	0.149996441	0.195886071	0.256504796	0.051055434	-0.215618251
LGR6	0.061508288	-0.099243719	0.150894964	0.127453205	0.167314514	0.16494948	0.133276119	0.180047236	0.189396856	0.213154228
AARS	-0.097483599	0.077930783	-0.03357945	-0.120937517	-0.05035493	-0.01715807	0.031425323	0.03961433	-0.157150998	-0.338856388
GFRA4	0.065921664	-0.03628622	-0.02079428	0.007934308	-0.016834463	-0.190723892	-0.208254841	-0.078654249	-0.156270646	-0.003653613
ZRANB2	0.154911361	0.156392795	0.103833148	0.12447294	0.137266983	0.088848692	0.081487038	0.114973612	0.043265017	-0.117197909
ASPHD1	-0.149824142	-0.001892843	0.106411225	-0.132494611	0.066103634	0.072065194	-0.045572967	0.163817276	-0.012546849	-0.067256758
LRPPRC	0.011904703	0.24618548	0.196607272	0.017001698	-0.069420674	0.017871549	0.057110005	-0.135630483	0.077360441	0.076829686
COX7A1	-0.041130098	-0.004752218	-0.039408469	-0.188002262	-0.178703778	-0.160454866	-0.176594572	-0.064213392	-0.11185081	0.028290923
AP2S1	0.002156688	0.059698149	0.474520667	0.491400008	0.346236243	0.317184266	0.283467103	0.158115106	0.522347054	0.555736814
SOD1	0.121798477	0.071257661	-0.083915938	0.048111144	-0.063706617	-0.137966475	-0.139264812	-0.18859641	-0.021171327	0.150997559
FCER2	0.067262672	-0.120156609	0.017308589	-0.124908588	-0.085046709	-0.003337239	0.071951299	0.003333498	0.091876876	0.153554436
C10orf35	0.045226192	-0.117043267	0.436965942	0.322607728	0.257309833	0.312788247	0.308847364	0.191001876	0.375275087	0.320798136
HTN1	0.021796732	0.057864287	-0.0381705	0.120377152	0.113621123	0.074016453	-0.138871081	0.050365914	0.005592564	0.134609038
SMA5	-0.026891379	0.015302794	-0.077504414	-0.115845311	-0.124269192	-0.083836341	0.11368009	-0.046570318	0.029968097	0.030301997
CLDN18	-0.019711061	-0.010923444	0.039715305	-0.147595678	0.001334886	0.101821022	0.162395715	0.131794801	0.035795874	-0.15280011
MED23	-0.015223384	-0.153920236	-0.100352982	-0.249361385	-0.122203727	-0.094868968	-0.019244012	0.047464586	-0.131683288	-0.166476477
GDNF	-0.024476963	0.006666318	0.100289248	-0.08785211	-0.092966766	0.020998322	0.087856348	0.017468981	0.170914014	0.270075164
LOC392395	-0.042583129	0.129776707	0.109407096	-0.062368586	-0.05525867	0.015394372	0.034182254	0.012726398	0.036922507	0.017241419
AKR1C1	-0.029353802	0.073317057	-0.083919649	0.031071805	-0.051581098	-0.214205534	-0.314762835	-0.231220552	-0.223760619	-0.070818616
C3	0.155054347	0.173545235	0.156948596	0.29909207	0.153500416	0.103539245	0.166019451	0.054359076	0.240745251	0.275608719
CXCR1	-0.110784858	0.150589251	-0.482891286	-0.348447841	-0.243372255	-0.368594665	-0.407844144	-0.251698987	-0.589060333	-0.505434344
C1GALT1	0.044633421	-0.325411077	0.164581964	0.072000664	0.063159123	-0.031278639	-0.12085089	0.062781704	0.045596015	0.21902034
PNPLA7	-0.07920754	0.373356295	-0.014812676	-0.230454963	-0.33532627	-0.250940373	-0.049265794	-0.166264704	-0.200857303	-0.166026313
PPP2R3C	0.251233363	-0.144465996	0.112515127	0.101671163	0.12101789	0.160072795	0.195797097	0.059644338	0.30589251	0.29474906
SQSTM1	-0.107441098	0.347040982	0.178752219	0.297821915	0.180860799	0.155118545	0.279262969	-0.024239003	0.239397507	0.169911012
TFPI	0.106049366	0.203398255	-0.176177864	-0.226382367	-0.120091317	-0.05381805	-0.100487875	-0.011043458	-0.14417624	-0.163858821
PUS1	-0.150797812	0.178547888	-0.437008587	-0.23506651	-0.114770562	-0.245542404	-0.263986941	-0.184309501	-0.443874587	-0.452654943
APC	0.025621667	-0.164862181	0.058149984	-0.023875899	-0.101411287	-0.099975684	-0.141152157	-0.117282908	-0.082595808	0.011314994
ADAM2	-0.01514425	-0.206313255	-0.165971738	-0.168365642	-0.098517767	-0.099081544	0.001234951	-0.054948918	-0.033225975	0.006450443
AMBRA1	-0.048007574	0.100092447	-0.105913235	0.052499373	-0.025718126	-0.093278743	-0.146654032	-0.149484605	-0.166319391	-0.163241046
USPL1	0.10626254	-0.219670082	0.101569016	0.123696387	0.145270509	-0.012825808	-0.228931861	0.043370524	-0.026839756	0.053739016
PKN1	-0.019527349	0.224265331	-0.012796574	0.043663369	-0.165258888	-0.139016122	-0.03776781	-0.264856256	0.030999794	0.156751066
SEC24B	0.04293512	0.083591637	0.342496717	0.368824547	0.265159721	0.440376325	0.546414755	0.293741355	0.580173256	0.339139377
GPBP1L1	0.239437514	-0.15035386	0.311274219	0.15850296	0.115376633	0.134193884	0.103028136	0.112696902	0.200768095	0.180371635
COL4A3	0.08406455	-0.067450893	0.019747257	-0.064184568	0.016563719	0.100625268	0.134035026	0.242424563	0.017195105	-0.169944525
OTOP3	-0.119972088	-0.03493703	-0.03998714	-0.326767635	-0.269555224	-0.251723325	0.02895087	-0.24810384	-0.113829319	0.002680256
OR5K2	0.041520473	-0.077660662	-0.035148265	0.024340931	-0.056419743	-0.033503926	0.076423898	-0.052500948	0.148182743	0.251592458
ACSM3	0.046684365	-0.154437251	-0.03797777	-0.038978514	-0.010510949	-0.081230965	-0.268281962	0.002475322	-0.204923471	-0.180471823
EDG4	0.117945096	0.068433579	-0.109291537	-0.094183536	-0.075295361	-0.185483952	-0.1397826	-0.026512847	-0.22070178	-0.151298791
EVI2A	-0.00740398	-0.194262602	-0.058651789	-0.122464036	-0.003479457	0.081678393	0.158038168	0.141959712	0.094433399	0.017569435
NHEDC2	-0.065129775	0.206384807	0.077367831	0.10130362	0.0748445	0.269344367	0.359018018	0.120647185	0.277865669	0.061661085
ZNF208	-0.09997748	0.037240323	-0.091111236	0.061823074	-0.072099307	-0.103981555	-0.008480377	-0.098180515	-0.021851034	0.032164983
C10orf68	0.077126149	-0.150312992	-0.020136678	-0.027601743	-0.018437982	0.045653534	0.201601844	0.083963255	0.190166159	0.211234364
CA2	0.047710282	0.433260126	0.170073687	0.106358419	0.006316888	0.208891736	0.40515817	-0.04118759	0.400006939	0.342616863
GPSM3	0.077825393	0.018132752	0.045611839	0.142751577	0.132870853	0.299134753	0.352965165	0.221863717	0.235621127	-0.003593891
MADCAM1	0.034594937	-0.0401106	0.032536703	0.006430173	0.047966101	0.135522567	0.170138031	0.126620369	0.201160255	0.195316936
WFIKKN2	0.141201379	0.002530109	0.09228508	-0.016672365	0.078887575	0.194405108	0.198008462	0.216066187	0.09276227	-0.150697969
PLEKHA1	-0.003319078	-0.315636096	-0.246433989	-0.095962636	0.057750038	-0.144626013	-0.323595202	-0.011115153	-0.257801939	-0.121836351
CD53	0.053176379	-0.112199991	-0.128660768	0.201086361	0.292966052	0.308892441	0.274857251	0.255775142	0.153835302	-0.159238738
GPR160	-0.03139087	-0.244971479	-0.137484576	-0.020194523	0.049795495	0.00284475	-0.135970681	0.03223924	-0.173186533	-0.239784446
TXNDC15	0.00246833	-0.337374716	0.021683031	-0.178832856	-0.105466522	-0.104559963	-0.20876718	0.025720122	-0.137457644	-0.023125682
IQCK	-0.069894948	0.050882607	0.115401868	0.196123632	0.175900422	0.123674851	-0.022743131	0.032018593	0.026752786	-0.083964793
CPPED1	-0.159603881	-0.008523256	0.213833835	0.046534582	-0.048811643	0.069627226	0.169629526	-0.04623153	0.256064667	0.383734874
FIS	-0.118710313	0.42948801	-0.471719847	-0.441931119	-0.616335208	-0.555006059	-0.134747592	-0.654789792	-0.228763006	0.067327911
TSLP	0.085339638	0.064980555	0.02594671	-0.010533985	-0.003324397	0.110744757	0.217428194	0.105833396	0.131285432	0.017416435
KLHL34	0.160544585	-0.120471003	0.39597159	0.406681263	0.296925379	0.36204263	0.422282618	0.189789816	0.579578137	0.596873604
BRWD2	0.16075813	0.156992475	0.370778133	0.284283203	0.161172854	0.307682241	0.368165634	0.132689459	0.355521494	0.15306331
ERCC4	0.112196121	0.178817111	0.326742488	0.142561228	-0.072240439	0.106549825	0.200142429	-0.006556426	0.241506465	0.194491685
ANKRD13D	0.000319919	0.125439899	0.038622826	0.19525054	0.092061421	-0.003049137	0.095559178	-0.092279119	0.08067841	0.130182119
SFXN3	0.004028472	0.199038132	0.041421752	0.018374616	-0.02582377	0.101460223	0.17849569	0.121824882	0.057524216	-0.048082646
CTAGE5	-0.122486714	-0.226547678	-0.166667395	-0.077512321	-0.051725552	-0.145593569	-0.302738593	-0.115007509	-0.164727499	-0.026184413
LMO1	0.23568451	-0.055450585	0.289919104	0.015728594	0.051184334	-0.028006586	-0.089682396	0.066156154	-0.019118336	0.104164878
LCP1	-0.086623989	0.224918226	0.004396891	0.273311782	0.302723583	0.240753925	0.351100949	0.209231445	0.18647675	-0.048916161
UBE2I	-0.229397408	0.159973987	-0.006596751	-0.022475551	-0.096561386	-0.168072964	-0.162786107	-0.30826275	-0.009132873	0.308174112
C1QTNF7	0.031283713	-0.079307327	-0.078706316	0.057339165	0.045989624	-0.042021969	-0.105465566	-0.002584977	-0.133565054	-0.147136517
PON1	-0.158709338	-0.026260351	-0.032619318	0.009408087	-0.138091012	-0.188615653	0.011872612	-0.201965005	0.037468577	0.180143923
FAM132A	0.058842948	-0.035409925	-0.163845267	-0.304328097	-0.310201218	-0.306157212	-0.355326861	-0.224908746	-0.299833469	-0.115477077
ZNF687	-0.074508023	0.072093859	0.090119716	0.138895287	0.056417791	0.002941174	-0.017901153	-0.069979096	-0.001357781	-0.004026959
CCT7	0.089801484	0.14273797	0.303012232	0.202127808	0.157914842	0.401796806	0.492122871	0.24310229	0.472786847	0.244046519
GRHL3	0.009476296	0.012257837	0.291204361	-0.025029171	0.052130536	0.056434813	0.004548109	0.082431765	0.097063526	0.165880359
COLEC10	-0.096350453	0.012302899	-0.114130428	-0.292443992	-0.302087993	-0.247783637	-0.193598099	-0.150047231	-0.279044516	-0.184275171
PSD2	0.253999426	-0.266843669	-0.214862288	-0.174923928	-0.194470132	-0.325261843	-0.343482104	-0.131875316	-0.3065775	-0.053580455
PRMT3	0.045237096	-0.291317417	-0.244031045	-0.094564283	0.020265557	-0.121470796	-0.278250143	-0.078297227	-0.279909405	-0.261040657
CD82	-0.055648487	0.149020085	-0.125775753	0.077676151	-0.010150497	-0.068386171	-0.155729898	-0.097549748	-0.140663634	-0.150399693
STOML2	-0.218615292	-0.008314561	-0.013599234	-0.292374819	-0.297487983	-0.425943272	-0.497212566	-0.384183361	-0.428096678	-0.143352151
HIF3A	0.016371087	-0.209874538	-0.310761395	-0.253487453	-0.10461887	-0.047921232	-0.186488481	0.151748103	-0.289392009	-0.423596045
SNTN	0.000297781	0.120309395	-0.146090784	-0.179419189	-0.31069365	-0.29939542	-0.1457945	-0.321078699	-0.203788164	-0.113081923
FNDC4	0.093067064	0.017553837	-0.436760099	-0.297493579	-0.127114219	-0.197349872	-0.323990853	-0.140508991	-0.425234684	-0.433702705
TMEM129	0.0288381	-0.037051532	0.035266437	0.200159592	0.079972686	-0.025139179	-0.096684337	-0.086545851	-0.002256523	0.057485977
SREBF1	-0.204149641	0.172135087	0.308633933	0.306920733	0.111607539	0.118382876	0.291853119	0.001245524	0.347580257	0.369727483
LRRC4C	0.015585041	0.084040596	-0.171911363	0.083633891	-0.002172006	-0.092420428	-0.143315731	-0.095602638	-0.122956123	-0.084443188
SDC4	-0.158186188	0.26690198	-0.431281945	-0.367992522	-0.225527956	-0.341657673	-0.375140962	-0.241606838	-0.562189688	-0.545393532
FLJ41821	-0.083660426	-0.085608677	0.136134263	-0.023412518	-0.067527816	-0.113008357	0.092824576	-0.113059901	0.087492879	0.27162082
CCDC67	-0.019229552	0.033376136	0.069949839	-0.126169869	-0.164434238	-0.190246935	-0.117869806	-0.12740098	-0.0965883	0.033210603
MGC33556	0.144876002	0.15315694	-0.001642642	0.065804519	-0.054688324	-0.236926565	-0.211955569	-0.172691643	-0.110275957	0.069936712
LFNG	-0.092865644	-0.011107603	0.254633192	0.337208045	0.201131902	0.130491641	0.162938364	0.087846109	0.209968534	0.241436186
LOC440925	-0.107014278	0.1688812	0.503340214	0.372635082	0.162478713	0.125645431	0.178222599	-0.041415529	0.378790405	0.518058798
SON	-0.075606067	0.043476466	-0.338717877	-0.191404133	-0.180226936	-0.314802784	-0.409451911	-0.268638117	-0.466641268	-0.369941946
CITED2	-0.035903825	0.40950839	0.047833219	0.156790589	0.07221873	0.017851651	0.097805731	-0.132106038	0.135453501	0.17848582
UBE2B	-0.063220277	0.100307666	-0.467028593	-0.419865372	-0.445931362	-0.336030114	-0.174393534	-0.294656735	-0.42103558	-0.356255272
SPTB	0.16063216	-0.095012724	0.015760236	-0.160860056	-0.178629443	-0.10841881	-0.191973829	-0.11367934	-0.022038003	0.146984957
TTLL12	-0.166963362	0.027047924	-0.136467871	-0.188288058	-0.212635583	-0.384708774	-0.506618448	-0.300690544	-0.364615806	0.010372468
RASGEF1C	-0.126694002	0.244166895	-0.048643569	-0.03506779	-0.110731395	-0.227121868	-0.191350079	-0.200902397	-0.236178276	-0.121091936
DSC2	-0.05748233	-0.241769389	-0.139149851	-0.09826919	-0.056966856	-0.152945314	-0.329876239	-0.062025769	-0.255628342	-0.119940496
LYST	-0.06633659	0.14144604	-0.476166233	-0.440085015	-0.310611029	-0.308770681	-0.229750717	-0.194382151	-0.461885902	-0.458729306
ADCK2	-0.086836589	0.121427917	0.516761086	0.568748028	0.42910057	0.421177072	0.399043294	0.176102174	0.540505365	0.418301651
CLEC12A	-0.126747594	-0.175487815	-0.246966497	-0.061199206	0.083729988	0.112863436	0.067719521	0.192256583	-0.09710645	-0.360668571
NOMO3	0.219429419	0.038279783	0.293768828	0.261267843	0.272649861	0.484815061	0.462530128	0.419489475	0.471833543	0.19365581
ZNF238	-0.05204142	0.243679792	-0.081853216	0.064383876	-0.022602094	-0.035666006	0.066922564	-0.019582191	0.026204993	-0.033404749
DDX31	-0.193841728	0.186438439	0.072786192	-0.054753103	-0.097636048	-0.137300158	-0.074625998	-0.194035393	-0.009810966	0.119022479
ZNF174	0.060730991	0.10270753	0.024338307	0.168715937	0.035252351	-0.00378886	-0.065599306	-0.089395905	0.002464026	0.040256304
ZNF337	-0.073013138	-0.112497573	-0.136005973	0.110494806	0.053144261	0.01563869	0.070729043	-0.012904089	0.10831244	0.097747516
MATN3	-0.086038376	0.146943784	-0.0674852	-0.134069068	-0.214294004	-0.133851996	0.051394365	-0.201545059	-0.052723437	0.074471194
LOC442582	0.092424586	-0.098997171	0.05819767	0.10219155	0.025878489	-0.04463759	-0.163389906	-0.051826916	-0.034584149	0.04070686
PROCA1	-0.069222713	0.076291124	0.025728021	-0.018131636	-0.032890151	-0.063308765	-0.148489624	-0.10995472	-0.069661214	-0.021762238
PLEKHA8	-0.004595505	-0.046430106	-0.070082319	0.118799385	0.062456058	-0.049470114	0.031167409	-0.065331019	-0.000507176	0.031564826
MCM7	-0.14202127	0.052739943	-0.033829682	0.074669561	0.001084236	-0.198255589	-0.196441931	-0.204540924	-0.25310278	-0.138517069
ITIH5	-0.136814151	0.258575978	-0.058003827	-0.156437188	-0.207173818	-0.13074986	0.024228236	-0.175110682	-0.064299591	-0.072791689
MRPL22	-0.104585256	0.123452761	0.129283534	0.268644405	0.152132583	0.220792081	0.253402766	0.055267423	0.370719505	0.349367117
KATNAL1	-0.020549279	-0.147835415	0.354375075	0.252784787	0.184679222	0.191231292	0.071318547	0.153959472	0.229178109	0.200127037
EPHA10	-0.008378286	0.124838377	0.041043507	0.140737321	-0.005056727	-0.100455106	-0.058286408	-0.19906224	0.033874918	0.190718737
ZNF702P	0.265103755	0.072850691	0.28101342	0.386612483	0.218997807	0.23255251	0.240382151	0.113374472	0.344683392	0.247345808
SOX6	0.035511059	-0.279388916	-0.006475385	-0.128732408	-0.119580482	-0.174623182	-0.221273504	0.001655298	-0.165856864	0.005972507
OTOF	-0.022670983	0.006815644	-0.007604671	-0.026333536	-0.02119968	-0.019772387	-0.050550613	0.094081615	-0.070622887	-0.174822982
SLC2A10	0.072165634	-0.248120999	0.460038772	0.461322686	0.619090274	0.525111669	0.351761355	0.491319864	0.434975544	0.186039994
RPH3A	-0.056964079	0.200157639	-0.177072666	-0.180034464	-0.152650515	-0.14302175	-0.117568848	-0.089139776	-0.163858091	-0.086837749
CCDC62	-0.114586298	0.214098141	-0.076822935	-0.193466961	-0.213168834	-0.117654133	0.029074309	-0.137638743	-0.030114211	0.041347629
FBXL15	-0.199437155	0.073923582	0.06724556	0.135857059	0.061031291	-0.125320613	-0.265183213	-0.207951058	-0.098353144	0.080887167
TRAF3IP2	0.046274981	-0.088502122	-0.399884803	-0.378763289	-0.205583952	-0.107371107	-0.104264901	0.051809583	-0.314935984	-0.430947797
GEMIN5	-0.064701408	0.194633528	-0.206782796	-0.132017145	-0.180991456	-0.039482874	0.169122757	-0.178587613	-0.026634657	-0.116599839
CDC20	-0.094748168	0.102344156	0.538021151	0.537550649	0.438063247	0.407341869	0.336163724	0.105530771	0.497662428	0.392773221
CAMK2B	0.040414497	0.147667943	0.376490349	0.349310954	0.245488382	0.448764905	0.514634803	0.280321383	0.529633116	0.277424339
TIMP4	0.044927311	0.023420645	-0.156824525	-0.314128512	-0.316056857	-0.33185691	-0.197274679	-0.242112079	-0.303529305	-0.108001856
LARP6	-0.111764459	-0.022389601	0.234672805	0.271752979	0.13266671	0.219150209	0.251393171	0.122122392	0.362223714	0.309711703
SURF1	-0.088187139	0.229601366	0.193012227	0.266168162	0.067826667	0.023162592	0.067388005	-0.187703467	0.225903688	0.368575128
C22orf33	0.058663228	0.009559123	-0.114116461	0.092209552	-0.063646267	-0.239109967	-0.282513228	-0.225856466	-0.150268886	0.070892481
RGL4	0.114864497	0.196642529	-0.227200686	-0.1471213	-0.149953807	-0.270443079	-0.265020838	-0.293766125	-0.355839564	-0.314322983
MED12L	0.026993233	-0.092584622	0.012870492	-0.10933925	-0.02716904	0.126241871	0.240608379	0.154780744	0.157520176	0.050580738
NECAB2	0.297158304	-0.096633376	0.106720467	-0.01253307	0.086617117	0.24555747	0.086490413	0.465436601	0.025754513	-0.238926809
LIN7B	0.005122104	-0.017628832	0.142423678	0.202427932	0.07434905	-0.054299052	-0.145980961	-0.104324692	0.016269135	0.160800506
SORBS1	0.091104197	0.286676672	0.084568273	-0.004479944	0.018530614	0.231720548	0.344573051	0.202231222	0.166945653	-0.118552612
HNRNPA1	-0.182010673	0.263244176	0.087725524	0.181172912	0.118940387	0.238576399	0.416472355	0.124511241	0.321230862	0.095343143
HIST1H2AI	-0.01350457	0.012367771	0.344566465	0.345801017	0.190801078	0.101300792	0.066651244	-0.003665124	0.264344789	0.394618783
PKP1	0.024238974	0.277815196	0.275322884	-0.043410751	-0.14013863	-0.230821094	-0.195445711	-0.264677029	-0.080693632	0.238052292
C15orf63	-0.244780318	0.158339672	-0.362969838	-0.330191872	-0.350950771	-0.165939594	0.07562699	-0.25307484	-0.149547774	-0.162543736
TLK2	-0.051848357	0.045180329	-0.222359657	0.006109689	0.05949517	-0.057476814	-0.210994561	-0.059635275	-0.255861802	-0.331591951
UBR2	0.069166285	-0.224728356	-0.2685465	-0.419291111	-0.327531878	-0.371380736	-0.431728792	-0.244945534	-0.480545746	-0.327256
ZNF541	0.221634882	-0.301322303	0.13204073	0.289474525	0.304988081	0.213773639	-0.055866932	0.233961437	0.184699223	0.19291096
MXI1	-0.079090124	-0.060043335	-0.102225793	-0.161086348	-0.089237106	-0.08522833	-0.001235681	-0.053845588	-0.018399663	0.040009849
COX5B	-0.076077196	-0.06025994	0.11235456	0.132776939	0.140338829	0.161487244	-0.004643659	0.089997116	0.207975579	0.240837362
SLC24A3	-0.072534705	0.052344776	-0.326725681	-0.25837761	-0.295403943	-0.417335859	-0.405049094	-0.307001409	-0.50825639	-0.362837589
RIC8B	-0.025350111	0.063182839	-0.412146485	-0.196762876	-0.184071765	-0.281575197	-0.337298709	-0.269319568	-0.397437193	-0.323924057
CLYBL	0.1367675	-0.128299712	0.332203279	-0.034007084	0.030490743	0.23997472	0.205121976	0.287335122	0.221773602	0.019493166
B4GALT7	0.017150503	0.125320981	0.173512118	0.113493705	-0.048580984	-0.138460924	-0.097554424	-0.230952185	0.052293557	0.299073486
TCF2	0.083660603	0.256113907	0.242775721	0.297617082	0.124702087	0.192081314	0.1549672	0.088951258	0.191701162	0.077345092
FTCD	0.180889172	0.055527998	-0.186804754	-0.320688597	-0.431254602	-0.249666938	-0.11227993	-0.137849572	-0.17123479	-0.035730753
S100PBP	-0.020919762	0.023751311	-0.236795473	-0.02808749	-0.035712284	-0.102947912	-0.221763584	-0.136783039	-0.236763086	-0.262422435
DPP6	0.106016821	-0.146315851	-0.038361021	0.015517221	-0.064289329	-0.046567885	0.025882658	-0.084515079	0.106522509	0.212386456
BBS5	0.057001162	-0.105039322	-0.084031016	0.007043126	-0.012901086	0.04163417	-0.040939716	0.030922081	-0.020612495	-0.064472844
RNF123	0.190102899	0.094986024	0.148960086	0.212080332	0.322305247	0.38008347	0.203355044	0.450112952	0.166437264	-0.178408108
DNAJC7	0.082916395	0.048678205	0.028915971	0.128570067	0.171313621	0.151025704	-0.016619277	0.098324682	0.002909923	-0.109174671
STAT3	0.106935293	0.05570577	-0.131451644	-0.155724729	0.022884591	0.097032969	0.079970551	0.144016053	-0.112954722	-0.331100778
ELMO1	0.028447983	0.24560087	-0.019581518	-0.058535228	-0.181332453	0.047965689	0.289745161	-0.040642073	0.063657171	-0.102324596
MAOA	0.011655957	0.053630521	-0.245165902	-0.177546851	-0.238620109	-0.088508899	-0.025708184	-0.134136004	-0.049632726	0.022220322
DMXL1	0.110492947	-0.367345177	-0.081147942	0.020743135	0.154947554	0.017525128	-0.206496111	0.142658868	-0.139258265	-0.155672872
MTUS1	-0.145091032	0.15274126	-0.211038407	-0.224110893	-0.148221029	-0.215981745	-0.091641319	-0.095714282	-0.295337009	-0.330412139
MRPS10	0.042696623	-0.087155775	0.40310256	0.240987053	0.183505605	0.297433142	0.300816072	0.235083773	0.455785513	0.354241819
C9orf171	0.072096373	-0.030778579	-0.024943913	-0.228478112	-0.066505076	-0.008346722	-0.039107215	0.114869792	-0.109583144	-0.183007092
FLAD1	-0.042751563	0.232096231	0.143041684	0.107988657	-0.066734132	0.012142942	0.1032744	-0.163595139	0.113552162	0.189558019
SNORD54	-0.097407092	-0.171385349	-0.321204177	-0.199895933	-0.224374254	-0.365879356	-0.433350844	-0.262896573	-0.402753988	-0.204037977
HEPH	0.082619855	-0.324222194	0.049869302	0.018910054	0.00185456	0.217056769	0.346966478	0.194894608	0.237836727	0.12196684
SLCO3A1	0.005379204	0.019483665	-0.03890373	-0.049194742	-0.157065227	-0.287446921	-0.202519681	-0.301364418	-0.133493279	0.131540133
PCDH21	-0.005435922	0.12318016	0.365431809	0.132459906	0.077771169	-0.077692466	-0.137431044	-0.112879715	0.078737746	0.341984412
LHFPL3	-0.062559485	-0.127183626	-0.039773887	-0.115055207	0.062625335	0.072647638	-0.03309135	0.152914533	-0.06025841	-0.102802461
DNAJB5	-0.100287332	0.199366655	-0.044191945	0.143651237	0.067280121	-0.120316974	-0.235893359	-0.14807538	-0.169657347	-0.059855389
SLC13A4	-0.033521517	0.052765467	-0.011326069	-0.021743569	0.101366509	0.093209357	0.011303583	0.154289456	-0.003121485	-0.089941235
ZNF442	-0.032570159	-0.296902952	-0.30035607	-0.276927339	-0.151616322	-0.230940686	-0.282805601	-0.060103251	-0.2840581	-0.153435911
SIX2	0.003223607	0.07983194	-0.068021289	0.109019995	0.070474475	-0.011355123	-0.12631557	-0.028850792	-0.072669577	-0.084696606
WISP3	-0.076268108	-0.122591664	0.004414812	-0.248659481	-0.318556832	-0.278384279	-0.107854696	-0.239829776	-0.170505975	0.024164342
EPB41	-0.093561673	0.06493898	0.022960554	-0.08036605	-0.199368736	-0.201765893	-0.176147007	-0.208541843	-0.161176998	0.005538701
MIST	-0.033926256	-0.036337617	0.083771163	-0.040344249	0.048044662	0.108056962	0.157435519	0.133081489	0.160875062	0.129242267
UNQ1940	0.016442122	0.002343623	-0.312267169	-0.263042926	-0.174429233	-0.193632501	-0.284254087	-0.053561645	-0.382734578	-0.35684885
CCDC148	-0.006647748	-0.075730738	0.145365915	0.155216075	0.088921719	0.115645292	0.091457946	0.100654617	0.153944381	0.07314908
SMYD5	0.047787118	0.211682232	-0.169506016	-0.163708404	-0.095670934	-0.312456996	-0.436281484	-0.207369748	-0.458056846	-0.32320232
ZNF286A	0.053580858	-0.062189737	0.13177892	0.056160367	0.107645662	0.216020471	0.292663811	0.206333699	0.310024049	0.249433115
TGFBI	-0.054446938	0.323833372	0.085855004	0.339564999	0.214850402	0.181118681	0.204682441	0.104842313	0.320762808	0.311229678
MMP13	-0.088785584	-0.050070951	0.070477906	0.04411375	0.07460147	0.192604428	0.214837343	0.180559727	0.203548585	0.079502871
C21orf128	0.075900224	-0.024804581	0.007025395	-0.154977665	-0.078760811	-0.026133742	0.036612384	-0.002498273	0.034221935	0.060374665
ALS2CR16	0.032439909	-0.125091831	0.056859045	0.02163113	0.05213134	0.037170436	0.023386176	0.12295914	0.127100164	0.197457171
ARHGAP9	0.078519831	-0.185621186	-0.207734782	-0.057616176	0.025516083	-0.056439571	-0.203774961	0.008611602	-0.254862816	-0.326110671
TFF2	0.128993677	-0.128712917	-0.175619335	0.086844725	0.011306738	-0.153788718	-0.25494369	-0.170657551	-0.134900652	0.040300608
TH1L	0.053722938	-0.166857007	0.032302692	-0.038599638	-0.064579231	-0.196503158	-0.273902409	-0.178254296	-0.16010629	0.109002579
LOC441233	-0.093493691	0.046878463	0.243885918	-0.018501679	-0.03595622	0.06169985	0.230031149	-0.020625474	0.185539853	0.119122364
CNNM2	-0.04427858	0.072964415	0.041662891	-0.114537803	-0.275701032	-0.251249662	-0.147878903	-0.222293996	-0.140271458	0.055113124
PDLIM4	-0.067455113	-0.174337849	-0.052694014	-0.007006394	0.023741188	-0.1019672	-0.085293136	-0.1615604	-0.00836207	0.158003334
MAGI3	-0.042413413	0.077557044	-0.228470511	-0.167713309	-0.150975512	-0.297836015	-0.310253762	-0.148054859	-0.423746525	-0.3497704
WNT8A	-0.140985244	0.165279362	0.029120166	-0.130982843	-0.037075689	0.049815248	0.152369318	0.023352393	0.065788908	-0.019658725
ARSF	0.142576807	-0.023334043	0.106546089	0.087847955	-0.086241887	0.102042193	0.373574149	-0.015438525	0.366674965	0.370722484
AGL	0.034566196	-0.396390327	-0.072400773	-0.120592951	0.00892174	0.040959728	-0.074061166	0.153681762	-0.031872157	0.016145656
RBM46	-0.048031205	-0.002992373	0.045706766	0.066486041	0.052079482	0.119478632	0.236408542	0.091785982	0.242874507	0.214212227
ELF1	-0.032449914	-0.033203206	-0.280277015	-0.168355722	0.003891813	-0.133185976	-0.145307342	-0.079344196	-0.273979396	-0.278999286
CANT1	-0.041941577	0.203641975	0.244360159	0.208647491	0.086748373	0.067925706	0.145498273	-0.094226943	0.169991069	0.22100674
STOX1	0.160818912	-0.150824894	0.063183302	-0.057948137	-0.061506362	-0.048246656	-0.054938188	-0.060809337	0.016653712	0.131633827
ARHGEF18	0.053429042	-0.017333449	0.514673922	0.534468523	0.514426554	0.67520366	0.594429001	0.525839971	0.655850739	0.26178232
APOB	0.185358389	-0.000995435	-0.227874346	-0.108986759	-0.034904354	-0.120715725	-0.229573899	-0.094377809	-0.301998063	-0.387949064
PXMP4	0.069917041	-0.18787244	0.39712729	0.332739058	0.273748006	0.38988409	0.296580421	0.281612218	0.463870913	0.385550876
CENPB	-0.085821762	0.256555051	-0.149634557	-0.259635614	-0.268307979	-0.309628836	-0.406849554	-0.174105662	-0.426281601	-0.269944997
RAB1B	0.131452529	0.066784809	0.407699193	0.289430586	0.319685475	0.431529266	0.343975302	0.400051662	0.377034797	0.140621666
CACNA1E	-0.242637798	0.206521505	0.107188915	0.055256749	-0.005138772	-0.000418396	0.208970238	-0.050346188	0.137564742	0.088282761
SEC22C	0.15266935	-0.160253553	0.389761157	0.351443478	0.256020163	0.452988685	0.445386856	0.304827088	0.557929556	0.431628728
FAM129C	-0.10804519	0.186798997	0.063868586	0.14644579	-0.008051023	-0.087874481	-0.02253607	-0.154751646	0.072115096	0.193397844
TNNT2	0.080642103	-0.064973362	-0.090052612	-0.127008953	-0.084018221	-0.145908797	-0.22893312	-0.003842306	-0.201737262	-0.147541184
LOC286076	0.214671171	0.016412383	0.187988368	0.148674938	0.026756886	0.029311006	0.116988138	-0.047697797	0.181097678	0.264606232
P2RY13	0.200445305	-0.099908265	-0.01877315	0.018677262	0.129988481	0.17665983	0.034366165	0.253217302	-0.020611664	-0.288921726
FASTK	-0.030199601	0.072259722	0.028763161	0.167870451	0.157837176	-0.057121821	-0.190553239	-0.094095373	-0.09596351	-0.00794427
GLIS3	-0.077531738	0.237184811	-0.09476396	-0.0565599	-0.120117985	-0.375204065	-0.361193412	-0.360621882	-0.282247009	0.088597712
RFFL	-0.198662043	0.24954379	-0.31302213	-0.201913474	-0.142515302	-0.073665751	0.080111441	-0.136152584	-0.160156094	-0.289596248
PTPN6	-0.048583943	0.219466688	0.235793091	0.281078071	0.213699405	0.360662522	0.3246369	0.159740185	0.320992148	0.055180725
SLC30A5	-0.012212953	-0.087226314	-0.037177969	-0.142803074	-0.000814597	-0.015503761	-0.114657253	-0.074299137	-0.076379717	-0.078099677
IZUMO1	-0.191799673	0.078639404	-0.086394861	0.005200273	-0.027284665	-0.268766621	-0.203366447	-0.267054286	-0.19474098	0.004787538
RPF2	-0.195813816	0.24396994	-0.414415255	-0.449121222	-0.42013595	-0.417829009	-0.423141225	-0.410585063	-0.507168419	-0.346487535
SLC25A11	0.003492378	0.004050931	0.28147148	0.230621777	0.097232518	0.082031519	0.067082411	0.000203742	0.213208724	0.299322432
CUGBP2	0.114394772	0.162470672	-0.033835694	-0.073603181	-0.131639809	-0.26666613	-0.290806349	-0.090762918	-0.269236345	-0.147455241
FBLN5	0.20005594	-0.124401509	-0.137372339	-0.014803277	0.083243347	0.201105536	0.198059763	0.2924164	0.0202958	-0.270201291
ATXN7L2	0.040455532	0.24229536	-0.081250797	0.005094155	-0.139064824	-0.256775445	-0.229130011	-0.161900405	-0.194336466	-0.03484594
MFN1	-0.227033956	0.319615541	-0.130682968	-0.142663891	-0.26821929	-0.253793946	-0.1374826	-0.346227375	-0.169925313	-0.016522557
NKIRAS1	-0.072720689	-0.186131476	-0.490367464	-0.334990175	-0.130607938	-0.346393857	-0.543196323	-0.169505555	-0.581279145	-0.453304261
TIMM23	-0.135525653	0.328821487	0.035975278	0.267051948	0.218626579	0.265084483	0.282458041	0.089042729	0.271654656	0.106344579
BCL2L14	-0.004750381	-0.113074063	-0.066483987	-0.17046619	-0.074040184	-0.036679993	0.005393002	0.050786483	-0.059530954	-0.102570339
ADAM28	0.280348352	-0.071672173	-0.018435814	0.215828841	0.064816831	0.066917324	0.089844214	-0.003550846	0.153278587	0.150267887
C20orf12	-0.014849511	0.16456707	0.377895842	0.410428277	0.308688761	0.30439827	0.362837897	0.193596895	0.46436322	0.34275721
USE1	-0.162056468	0.123790128	0.076928963	0.058903109	-0.119099734	-0.208250884	-0.123179108	-0.331596622	0.012170824	0.283643276
MGC40069	0.025162653	-0.094041018	0.035624384	-0.153893102	-0.095707445	0.107389937	0.267286416	0.135440182	0.194530125	0.110001822
EPHA1	-0.044894079	0.198622713	0.455436927	0.385326502	0.140880207	0.144555985	0.239392543	0.042064772	0.390815685	0.463271396
WBSCR28	-0.033964459	-0.019354133	0.017424144	-0.085661078	-0.004593404	0.052963677	0.113787117	0.062460368	0.120120184	0.113912095
TBX22	-0.057264745	-0.347283278	-0.013755981	-0.044607832	0.033516438	0.133125068	0.255392426	0.133671033	0.152390263	0.041036154
C9orf75	-0.071756068	-0.147732367	-0.350300125	-0.160050031	-0.012578953	-0.190226354	-0.424302398	-0.125719379	-0.503382524	-0.479763877
LOC440570	-0.017449787	-0.08547215	0.000438638	-0.155769326	-0.060138011	0.031300722	0.134392104	0.099197195	0.062848984	0.028662586
ZNF415	0.054160967	-0.134605517	0.265127731	0.105663075	0.068496158	0.078978598	0.164020987	0.059629744	0.286431276	0.357291086
LEPRE1	0.068566614	0.300609544	-0.020375538	-0.112596456	-0.191535045	-0.279278898	-0.151478474	-0.289561685	-0.247609448	-0.124829931
HTATIP2	0.039317451	-0.253999397	0.029783613	0.228751426	0.250154402	0.169891274	-0.036375655	0.149340818	0.103087207	0.0678348
CCR9	0.049952585	-0.279048437	0.119198717	0.013296599	0.005695959	-0.097277684	-0.205164076	-0.017955133	-0.034393022	0.162608877
SLC14A2	0.115752994	-0.020232991	0.107820463	-0.014581406	0.14917222	0.19776417	0.154187222	0.206505711	0.131929224	0.015664205
MBIP	0.018275423	-0.143924908	-0.213938193	-0.211826065	-0.066988893	-0.154092624	-0.300713012	-0.021568681	-0.240515599	-0.170674392
CEACAM1	-0.052919896	0.233055951	-0.267513145	-0.198115649	-0.18612454	-0.169207642	-0.015664908	-0.147770617	-0.222627	-0.232841241
PNPLA4	0.100779812	-0.616879075	-0.00836423	-0.020022448	0.134869214	0.134662603	-0.07331431	0.249163749	0.005850835	-0.013578393
GBA3	0.061882766	-0.034439163	0.330954104	0.249821755	0.143447667	0.200246257	0.254777678	0.126548027	0.387778477	0.352855851
SGIP1	0.087955591	-0.363562095	0.457244091	0.343924731	0.347794569	0.356898219	0.242865725	0.341991562	0.408947702	0.356059171
FLJ40288	-0.009229584	0.124890286	-0.011416584	-0.071902941	-0.155723353	-0.196080338	-0.03792961	-0.137303796	-0.042064068	0.015496669
COQ6	-0.0568856	0.355518486	0.142050397	0.108737948	-0.039252826	0.180429834	0.286694675	-0.019885095	0.282382939	0.178323592
DHTKD1	-0.070209116	0.011018212	0.280628834	0.134715751	0.109605566	0.244446174	0.295460876	0.185142198	0.348540814	0.215603681
C3orf47	-0.036573091	0.260975627	-0.041174255	0.113090237	0.009515551	-0.044730592	0.145706593	-0.120528956	0.073123919	0.080048063
MEIS2	-0.012151879	0.288047883	-0.103087762	-0.154778306	-0.274989354	-0.238380646	-0.280649619	-0.205725258	-0.130578668	0.061943244
ZBED5	-0.039129723	-0.12729573	0.048885048	0.18190804	0.181504808	0.109436592	-0.044798919	0.113149443	0.047945964	0.001337545
TCF3	-0.034581052	0.147643526	0.027579723	0.081317373	0.021583605	0.024876294	-0.05038116	-0.063931731	-0.031394804	-0.060076247
TAF1	0.010298477	-0.092032801	0.049780511	0.14451643	0.149086012	0.044575195	-0.167741154	0.036267379	-0.039597733	0.012120237
TP53BP1	0.028865969	0.167019532	0.471822226	0.503259767	0.379070845	0.471983649	0.554107292	0.314982076	0.559653682	0.301355126
PEX12	0.102144957	-0.341032128	0.051042365	0.17819428	0.278166339	0.232013016	0.017686827	0.23341384	0.139053444	0.038508283
ALG5	0.041002591	0.006439942	-0.127744973	-0.006608256	-0.10544855	-0.202385306	-0.221152685	-0.210343646	-0.107451435	0.101687594
ONECUT2	-0.079700081	0.384128457	0.212842531	0.193990951	0.026229548	0.106525113	0.246796928	-0.047326736	0.175842145	0.123692349
PTGDS	0.204974204	-0.293068299	-0.177486884	0.085381676	0.200034582	0.082130095	-0.109248255	0.228572315	-0.161957765	-0.315687093
KLHL9	0.016913356	-0.115870511	-0.14799814	-0.26275275	-0.254352017	-0.100773467	-0.002254881	-0.099212047	-0.066060893	0.001370154
PLEKHG7	0.168599487	-0.056979118	-0.074840025	-0.059968687	-0.120803816	0.027013122	0.079243007	-0.003303948	0.036678653	-0.008327765
CRMP1	-0.106678051	0.134918814	-0.028690983	-0.077875479	-0.114437447	-0.2646812	-0.184308339	-0.225754035	-0.119942902	0.163678068
NDC80	0.053032403	-0.37427034	0.448812286	0.491794534	0.488045747	0.488347203	0.340207368	0.424039627	0.512136113	0.349282489
CENPF	0.007929269	-0.00321287	0.274578378	0.181944952	0.16427749	0.160389182	0.217135689	0.030018682	0.222797511	0.118052457
USP11	0.00212606	0.107516427	-0.163204456	-0.018979906	0.148007669	0.142330107	0.071036518	0.184233186	-0.08460984	-0.299040849
IFIT3	0.03023956	-0.106610659	0.412140095	0.524233955	0.489212676	0.603935191	0.56931178	0.506562715	0.667280709	0.36159213
FLJ33360	-0.057589485	0.109567752	-0.087818282	-0.199679749	-0.152181825	-0.149877041	-0.057912049	-0.064245648	-0.156064521	-0.182069795
PROZ	0.038665107	0.150463665	0.03383255	-0.191997021	-0.195369694	-0.058246475	-0.000742703	0.112135486	-0.1940388	-0.357425301
DLD	0.108054229	-0.150769469	0.192132289	0.358613074	0.340503544	0.33482684	0.3025715	0.196479223	0.502391453	0.482541663
MICALL2	0.032443027	0.164297103	-0.060025007	0.083180885	0.035004509	0.111197356	0.07370815	0.121697603	0.031901486	-0.170646107
C1orf95	0.028001506	-0.047646589	0.109865549	0.019561341	0.103404526	0.102731598	0.122035751	0.135898617	0.105947226	0.051572057
NRIP2	0.213968733	-0.115741262	-0.064050928	0.150926592	0.102216067	-0.077589893	-0.219782187	-0.008239821	-0.054701428	0.12901373
INPP5A	0.017862672	-0.167191834	0.109955762	0.123513802	0.054110322	0.010321321	-0.085388744	0.015877907	0.067725825	0.223332441
FAU	0.023043511	0.00850766	0.051012036	-0.032069988	-0.15832953	-0.180306799	-0.169102237	-0.23399672	0.005853975	0.301037946
CHEK1	0.119874826	-0.057247719	0.49541978	0.47367885	0.481037554	0.564174708	0.493021285	0.469457654	0.455194973	0.076397974
MED4	0.194591437	-0.233069761	-0.341803542	-0.440505132	-0.255979609	-0.311583139	-0.474296628	-0.110146487	-0.509043641	-0.419762228
ATG16L2	-0.007894366	0.228044156	-0.205833858	-0.281149271	-0.383581617	-0.333088062	-0.074813939	-0.294384949	-0.231564942	-0.123498166
NSUN6	0.011020476	0.04464057	-0.592565058	-0.428595251	-0.364663351	-0.57034577	-0.649153096	-0.378521101	-0.676107713	-0.433527269
CADM2	-0.200490028	-0.153207113	-0.368991998	-0.511232284	-0.377160251	-0.443041963	-0.375543292	-0.31984035	-0.517409297	-0.376216461
DNA2	0.044116329	-0.304100554	-0.241086357	-0.100131418	-0.015572358	-0.169276873	-0.401653144	0.011856481	-0.334806168	-0.245875676
DAPP1	0.025235158	-0.145016586	0.176734251	0.318018484	0.361816534	0.242246701	0.00042057	0.239407031	0.085309119	-0.036803254
UNC119	0.067627191	-0.120241788	0.29379662	0.325265345	0.210616386	0.186475022	0.115557012	0.086964625	0.260636007	0.264299381
FLJ14816	-0.00500935	0.068077063	0.080271453	0.007080315	0.027961192	0.099429415	0.113230162	0.126654589	0.165344962	0.196477896
LOC653604	-0.060720635	-0.005079696	0.043992124	-0.009046132	0.038937168	0.037520395	0.114290221	0.093541723	0.108075973	0.096370357
CYP51A1	0.119904795	-0.369894197	-0.040855631	-0.134913201	-0.143883513	0.004342914	0.059230025	0.055433407	0.059951207	0.128416034
C11orf54	0.189970147	-0.199950326	-0.133727922	-0.278713893	-0.152008402	0.022174408	-0.010384782	0.022792974	-0.028929895	-0.033393289
C10orf72	-0.008493322	0.071162491	-0.296772077	-0.007668842	-0.057066803	-0.122324792	-0.002280734	-0.046574934	-0.183271388	-0.282466593
SLC25A25	-0.259658366	0.066704811	-0.090960973	-0.070319231	-0.022453774	-0.043607282	0.010557305	-0.00622692	-0.025611067	-0.022482588
TMBIM4	-0.087073653	-0.074281466	0.193797933	0.143169222	0.213921564	0.339828693	0.229582728	0.243228932	0.327538989	0.186006142
KPNA4	0.004201091	-0.038088165	-0.034238934	-0.029330429	0.100502977	-0.012000999	-0.109734472	0.036192914	-0.023524845	0.086234036
TMEM138	0.127215605	0.320301603	0.28762077	0.30684865	0.172545236	0.202312271	0.114244583	0.049277877	0.251530738	0.171767281
SH2D4B	0.045684326	-0.153954858	0.023625925	-0.140444078	0.012316322	0.16122413	0.205978133	0.171136697	0.095936693	-0.06360873
OR5I1	0.031064806	-0.019700297	-0.033891663	-0.085358831	-0.048974848	-0.00726218	0.146920138	0.001457719	0.072295268	0.041558387
ATP2B4	-0.082843942	-0.047333306	-0.398643525	-0.35760849	-0.189302783	-0.198804549	-0.107457523	-0.071919327	-0.350600492	-0.404085568
C11orf49	-0.029541282	0.120226232	0.243494462	0.19763862	0.059723995	0.046301732	0.021048889	-0.05350137	0.141626825	0.212804567
EFR3A	-0.08174549	0.034862026	0.229460805	0.106173042	0.122456481	0.138258508	0.164853239	0.054528691	0.119117706	-0.013373735
FBXO18	-0.115999983	0.118772225	-0.126612439	-0.143022284	-0.233160885	-0.401453494	-0.373711968	-0.328466064	-0.339001042	-0.049548481
GRHPR	0.203634947	0.018879928	-0.033584903	0.073848531	-0.05253236	-0.138738091	-0.119804952	-0.18374193	0.017855512	0.222255916
WSB1	0.044350718	-0.170481766	-0.296522085	-0.093213519	0.020490248	-0.134265	-0.349159157	0.028145464	-0.319549489	-0.298730126
TAOK3	0.036138097	0.237112049	-0.1366058	0.027848262	-0.14062378	-0.092273697	-0.07927403	-0.138824838	-0.068726803	-0.040208086
FBXO33	-0.139516555	0.066489615	-0.31541849	-0.198697838	-0.02723605	-0.09504376	-0.165309775	-0.0291623	-0.309062403	-0.36997072
APOBEC3H	0.18857568	-0.005088786	0.136757922	0.149861179	0.144307663	0.278636923	0.370955545	0.242191714	0.334206291	0.130497576
MRPL50	0.123993948	-0.153932516	-0.183025172	-0.180727029	-0.062628975	-0.131590197	-0.337356101	-0.039995705	-0.250924753	-0.216775639
PPP1R14C	0.018991523	0.014042201	0.278185746	0.063246679	0.012407612	-0.003713777	0.044922943	-0.02135147	0.137362219	0.308163461
ST8SIA1	0.080553323	-0.145612103	0.039009611	0.007467231	-0.041454629	0.113852589	0.251366883	0.041282449	0.219185619	0.162451775
ID1	0.093675406	0.339003568	-0.132091477	-0.208733239	-0.283153279	-0.225586826	-0.229019588	-0.25342496	-0.277834594	-0.240317028
CTRL	-0.074869395	0.017067629	-0.244404933	-0.213581716	-0.21783485	-0.338646649	-0.302578798	-0.175969296	-0.387065081	-0.298540973
CACNA1G	-0.01753572	0.02353282	0.047732972	-0.114849846	-0.081286234	0.037865409	0.186212561	0.081774377	0.116555426	0.078790661
NLRP2	-0.009645056	0.113535285	0.072294792	-0.050546141	0.008666339	0.039959695	0.120595057	0.044391255	0.07943066	0.035501226
RPSA	0.061856056	-0.232560145	-0.053579058	-0.008836246	0.000162159	-0.039787753	-0.218621244	-0.019014585	-0.105323111	-0.035660538
CT45-2	-0.100490855	0.195412086	0.051064741	0.13818617	-0.022163099	-0.196913306	-0.237343365	-0.250177377	-0.007933322	0.323589788
KCNK9	0.115818993	-0.111484228	-8.20E-05	0.004390241	-0.07322331	-0.124029586	-0.121919385	-0.139483476	-0.023653386	0.102248096
C19orf12	-0.197063986	-0.227112634	0.154275655	0.157654074	0.23812059	0.165443571	0.220321167	0.226056253	0.093726823	0.003371462
PPP6C	-0.142340063	-0.195481589	-0.093991415	-0.189878069	-0.077842273	-0.049619241	-0.118877105	0.054253446	-0.074116885	0.049181536
FLNB	-0.213010551	0.227815579	-0.017619874	0.04979097	-0.030541422	0.037064664	0.170858663	-0.039705013	0.028003273	-0.03220091
ZNF599	0.063890576	-0.254876857	0.06700986	-0.035801994	-0.073063471	0.058790017	0.261132845	0.026612966	0.283230124	0.341133071
GTF2E2	-0.206439811	0.094471941	-0.158134849	-0.157739035	-0.072134782	-0.128465881	-0.178936089	-0.130322201	-0.277380694	-0.360968606
ZDHHC16	0.172603907	0.067071191	0.131145609	0.073563929	-0.124086613	-0.189391117	-0.113056937	-0.174120676	0.018408171	0.226301522
SSU72	-0.033131597	-0.050826245	-0.198755228	-0.112084374	-0.191035293	-0.281963248	-0.237584498	-0.268793226	-0.226748865	0.0002798
KIAA0284	-0.020453505	0.314523894	0.200944289	0.253494106	0.259163746	0.2948079	0.287063466	0.255966139	0.254976269	0.058728387
TJP2	-0.011294293	0.077171898	-0.562533166	-0.513356141	-0.380917448	-0.452526876	-0.498772057	-0.338220527	-0.66287844	-0.545651586
MINPP1	0.126870474	-0.206595615	0.090542908	0.131680708	0.157505277	0.00025022	-0.203439253	0.046883949	0.034764345	0.190407508
CASC3	0.090894893	0.342043121	0.274918844	0.182141643	0.089292038	0.304425714	0.402678069	0.1559774	0.334357264	0.09209059
LHX3	0.045899143	-0.237001185	0.047780599	-0.216403811	-0.166695185	-0.194447947	-0.177597519	-0.111968055	-0.08112103	0.158033662
NPR3	-0.009421494	-0.161312097	0.249333489	0.186956307	0.111557516	0.128159678	0.123493656	0.113447065	0.263128224	0.315119037
KRT14	0.081690529	0.065446439	0.313013216	-0.026360545	-0.05010576	-0.128250197	-0.14475955	-0.086182664	0.007780753	0.277757932
RBMS3	0.088431148	0.147126503	0.006213959	-0.001708849	0.034541727	0.240015694	0.376075665	0.244144638	0.175785785	-0.119631673
SPG11	0.134194118	-0.555038129	-0.066978819	-0.06389975	0.102094858	0.004518151	-0.104179206	0.107137001	-0.040272598	0.003902556
TCHP	0.069372529	0.162135505	0.383627408	0.326721643	0.200997098	0.351376851	0.529443429	0.19521886	0.540807684	0.392655655
SERINC3	-0.059777685	-0.249814743	-0.061922888	0.023920293	0.078631084	-0.011183962	-0.175916638	0.061305731	-0.104613357	-0.019936979
C4orf14	0.204502677	-0.275594911	-0.063115621	-0.016410581	0.055131894	-0.11308139	-0.365628238	-0.049084092	-0.186743351	-0.097032973
SPTLC1	0.047674635	-0.119525722	-0.019979437	0.081191578	0.084919642	-0.008190304	-0.189082406	-0.018450339	-0.08096126	-0.04492565
NELF	0.083564117	-0.220639532	-0.018674558	0.091648154	0.101425006	0.067494521	-0.108924637	0.074373973	0.0014062	0.013451237
PTGS1	0.048367841	0.135096842	0.231478008	0.041448946	0.003466794	0.108683406	0.289629632	0.071220408	0.265939785	0.229688112
ITGB1BP1	0.11994317	0.025234164	0.251041109	0.322427824	0.223357806	0.178294185	0.126014995	0.176602175	0.220312512	0.18279458
C6orf89	-0.106735491	0.148054641	0.401301407	0.351530407	0.272853247	0.462550276	0.616490669	0.264251663	0.558642263	0.288578097
NMNAT3	-0.00280361	-0.042391448	0.150679044	0.154690189	0.050138154	0.029495866	-0.049928181	-0.06037038	0.077890419	0.135855947
CD36	0.05166742	-0.072056306	0.004681949	-0.105761054	-0.0037707	0.097582506	0.189437561	0.126056003	0.106493055	-0.002532176
RBBP6	0.051830271	-0.20575763	-0.414845195	-0.247449836	-0.117634946	-0.239227936	-0.362126482	-0.071040172	-0.413229297	-0.362534432
HERC2P4	-0.175955767	-0.004999582	0.15155461	-0.062362751	-0.008350263	-0.015190396	0.067357616	0.021161685	0.042472308	0.099828162
FCRL2	-0.114323404	-0.046894435	0.193535644	-0.067448883	0.009153322	-0.022344744	-0.080454221	0.037723068	0.078630233	0.231690478
CTR9	0.078152248	0.060830092	0.035878725	0.094218931	0.238733663	0.280110266	0.145767686	0.258791096	0.086865896	-0.163469043
RORA	-0.023948454	0.0891965	-0.244755365	-0.227113613	-0.244270804	-0.401105198	-0.353941717	-0.249352259	-0.432631674	-0.249751365
OPN5	0.321016681	-0.225291521	-0.061638373	0.045076687	0.117309461	0.10302696	0.051742884	0.248253086	0.003916459	-0.135088752
NUDT6	-0.067083428	0.153374393	0.354304937	0.211785143	0.021214709	0.09970028	0.165883052	-0.07549793	0.315617156	0.396114559
SUMO4	-0.072538813	0.176162862	-0.044366262	-0.05943126	-0.18489724	-0.110893943	-0.127309043	-0.214594365	-0.050412538	0.067998768
ZNF260	0.029323637	-0.242638489	0.437481297	0.38452672	0.283075374	0.346794182	0.348542125	0.263166219	0.514352813	0.46078031
C10orf85	-0.027543104	0.077322538	0.024102631	0.086500143	0.049859775	0.053284341	-0.094114422	0.073260055	-0.011366626	-0.02667302
LOC441426	-0.02036275	-0.085496467	-0.057486994	-0.146434835	-0.03636362	0.061388199	0.098858164	0.139725601	-0.012948734	-0.137844971
EDC4	-0.128970742	0.2630612	-0.217143537	-0.137338374	-0.238483215	-0.378595867	-0.363897206	-0.393880736	-0.436725996	-0.291796838
C3orf34	0.025619424	-0.015893481	0.071796099	0.245698801	0.203423304	0.181132083	0.019947538	0.112144342	0.13193364	0.115980052
LTBP4	0.030929184	0.015766584	-0.198643536	-0.230083123	-0.090825759	-0.089885121	-0.05247066	0.112778443	-0.247079533	-0.366181903
CRTAP	0.152402055	-8.23E-05	0.229947019	0.133294049	0.12367917	0.381602245	0.468394696	0.291435035	0.383408291	0.104894928
FKBP14	0.06500045	-0.064961562	0.578478989	0.465109112	0.418966087	0.615151514	0.615754169	0.46471364	0.748872598	0.502007144
UMODL1	0.103100624	-0.207332539	-0.137978559	-0.352060482	-0.38266705	-0.43481311	-0.351216086	-0.2757308	-0.308394041	-0.005356975
RIMS2	0.037524703	-0.179319262	-0.043142819	-0.170637726	-0.108515956	-0.02812463	0.047367753	-0.028605992	0.005267344	0.001441811
FLJ25996	0.003955877	0.384363256	0.472503031	0.322650552	0.074025601	0.200123613	0.404297469	0.028486941	0.513595509	0.466767472
SPCS1	0.008949711	0.08078963	0.387594286	0.588587956	0.526789039	0.533812088	0.400978479	0.358751055	0.573531088	0.367312049
C1orf25	0.176348525	-0.100684787	0.535319031	0.20484987	0.272797872	0.357332897	0.226492755	0.366036609	0.355518257	0.198462115
WDR38	0.214707186	0.115544695	-0.13292431	0.10040183	-0.112820459	-0.175961854	-0.092267574	-0.225048668	-0.092242322	-0.040867664
FOXN3	-0.053744085	0.164872793	-0.027580357	0.00430055	-0.048606704	0.080996599	0.101168119	0.029996475	-0.012528269	-0.134368806
STH	0.001876647	0.034923454	-0.003564142	-0.092892275	-0.067136736	0.027422562	0.122168611	-0.00429468	0.055271441	0.038435302
NRTN	-0.163797595	0.342818466	-0.396972726	-0.014048052	-0.147886389	-0.154962177	-0.055326085	-0.274237292	-0.114515668	-0.025809974
AMT	0.061056488	0.068374994	0.11875913	-0.110073521	-0.185197918	-0.230942805	-0.198073427	-0.257107042	-0.182785529	-0.025381982
DIABLO	-0.00506599	0.207836666	0.086054824	0.150992692	0.097468112	0.204657526	0.271060382	0.098312344	0.289774482	0.158459558
EPS15	0.129282927	-0.442970006	-0.1520221	-0.12847323	0.013249273	-0.097783169	-0.244132777	0.066165349	-0.19269171	-0.100225783
FXYD3	0.096466951	-0.123867748	0.0502234	-0.174585335	-0.026720534	0.043684804	0.056387927	0.107991704	0.026181622	-0.041102374
COL9A1	0.118364897	0.001382358	0.102910239	-0.04202707	0.029891591	0.116223351	0.110662068	0.179339543	0.080150815	-0.01785641
SH3BP5L	0.017275254	0.24843964	0.267978867	0.17547873	0.062414207	0.071685655	0.011035783	-0.023979602	0.102980256	0.089261789
ZNF445	0.032177582	-0.002932051	0.021303563	-0.019026831	-0.052858106	-0.044520426	-0.166622069	-0.023635779	-0.094761284	-0.044681685
ZFP91	-0.039758849	0.068671692	-0.211470898	0.049373135	0.150168096	-0.005149097	-0.046105474	0.020625688	-0.136633463	-0.234600734
RPRM	-0.206206898	0.248649632	-0.124913844	-0.29036137	-0.327275103	-0.242855557	-0.064270057	-0.242437302	-0.185427807	-0.04092735
GSDMD	-0.180145512	0.126777005	0.166004117	0.068354543	-0.030693506	0.144170484	0.204749006	0.040260482	0.242785814	0.277322914
GPER	-0.01734011	0.270729228	0.254649976	0.329361905	0.109085746	0.11079494	0.124227857	-0.059029113	0.246396361	0.240093373
CYP2E1	0.068087602	0.196845219	-0.045976905	-0.12525961	-0.207613762	-0.364707197	-0.378225655	-0.320285327	-0.246503179	0.018577413
NOL6	-0.037951175	0.296051098	-0.189039975	-0.220498045	-0.202074378	-0.065705782	0.050368575	-0.119265478	-0.133466034	-0.250221229
ROBO4	-0.008630314	0.111478634	-0.073176916	-0.140725162	-0.212184005	-0.287585957	-0.287451048	-0.256227577	-0.309789243	-0.165356665
DCUN1D3	-0.039988692	0.19518816	-0.38424528	-0.406865016	-0.446460867	-0.528870754	-0.470204024	-0.446773228	-0.575987779	-0.299690754
CLEC4C	-0.040325048	0.160085562	-0.031757618	-0.072174619	-0.037982344	0.072914233	0.151344683	0.046075275	0.081082853	-0.061966397
PDHA2	-0.118996809	-0.025331895	-0.042846211	-0.058588024	-0.171356887	-0.173449432	-0.075064225	-0.095941554	-0.161436949	-0.208714733
C2orf54	0.072194796	0.037047128	0.51273264	0.286279034	0.069109961	0.234640774	0.433310405	0.041674521	0.574219262	0.589044904
KIAA0020	-0.08146547	0.053990264	-0.48070143	-0.406428697	-0.257249776	-0.351583393	-0.387894831	-0.299567937	-0.521124722	-0.459646677
SORCS1	-0.126798367	0.158433467	-0.25615601	-0.056293798	-0.097447727	-0.160687722	-0.184741195	-0.116137202	-0.206101629	-0.05066992
C10orf12	-0.040034521	0.213280015	-0.224445273	-0.166078502	-0.052524138	0.005702007	0.055640637	0.01293075	-0.179112278	-0.404474421
ERRFI1	-0.168554905	0.116018221	-0.186722321	-0.432915326	-0.316461747	-0.196594264	-0.015059211	-0.194054754	-0.195019596	-0.221236698
MGC4677	0.096821971	-0.085009013	-0.361327339	-0.184185912	-0.124368736	-0.119918449	-0.263156276	-0.042297773	-0.349020207	-0.398604777
STAMBP	-0.383045652	0.353741719	-0.11767726	-0.073938665	-0.15534325	-0.264878938	-0.159091477	-0.334495474	-0.186048742	-0.058899804
TCEA2	-0.047104546	-0.067050554	0.280500737	0.371855748	0.213575399	0.181425964	0.185148049	0.111524074	0.269183998	0.238681635
SKP2	-0.064484874	-0.160083509	0.343095648	0.391350869	0.279527652	0.323226333	0.345717547	0.222402801	0.491659765	0.402193344
CADPS	0.070824204	0.047741635	0.046073163	0.310191353	0.203910276	0.066792036	-0.036587408	-0.037287401	0.137131135	0.21893011
BRF2	-0.126690243	0.013456784	0.234730461	0.255170715	0.064789589	0.096022429	0.137106003	-0.104037266	0.257285498	0.371422876
USP15	0.029529777	-0.298927153	-0.215451392	-0.264660638	-0.142213828	-0.242812091	-0.364166643	-0.096448325	-0.281086643	-0.089730946
PLIN	0.123799289	0.131861278	0.327868016	0.25547593	0.144856387	0.160095281	0.132845836	0.011143855	0.299904157	0.295268262
WDR5B	-0.232811564	0.000577454	0.095788105	0.102775845	0.034628755	0.040422015	0.162820178	-0.074099827	0.214634265	0.273303719
POU5F1	-0.047806869	0.185525183	-0.137315981	-0.136915261	-0.173613238	-0.020819083	0.220963344	-0.031732694	0.007951298	-0.156307967
CD180	-0.030045032	0.150085869	0.014137059	0.1213801	0.030159869	-0.120486991	-0.222952736	-0.17729341	-0.143417232	-0.065256113
CTDSPL2	-0.023384911	-0.38335272	-0.090053724	0.065491233	0.228322118	0.123643331	-0.032569768	0.219152394	-0.007324816	-0.070025716
LCA5L	-0.070814608	0.190940316	-0.03055105	-0.025879252	0.014435574	-0.027319482	0.008017476	-0.003957984	0.036621287	0.090835758
C11orf17	0.06248551	0.129945402	0.040254104	-0.010062818	-0.069586224	-0.099286005	-0.079945466	-0.082231028	-0.028281444	0.002965901
EPO	-0.081531237	0.310300903	-0.251242198	-0.17429972	-0.210613972	-0.360073544	-0.315271339	-0.359683491	-0.393521119	-0.244484705
PEX10	0.039472571	0.143805969	0.100634832	-0.149329533	-0.169456708	-0.044141498	0.176176484	-0.083569403	0.070809826	0.027781677
IL15RA	-0.142350816	0.011944483	-0.441827129	-0.294043822	-0.174321239	-0.2332994	-0.234855685	-0.155907597	-0.40755288	-0.437094572
FAM38B	0.335721103	-0.190961232	0.351709253	0.085528368	0.101395046	0.28135314	0.262152157	0.278545477	0.301242163	0.090695077
ACTN3	0.00794192	0.040440882	0.304209034	0.031874182	0.05397539	-0.021162206	-0.096287791	-0.027559809	0.095891882	0.338816315
EFNA4	0.041457232	0.158096314	0.349957529	0.26460985	0.075205122	0.044599477	0.047892242	-0.121379265	0.229583415	0.346804929
C4orf22	-0.094609062	-0.00843661	-0.0419851	0.02014396	-0.063124116	-0.17995619	-0.170435398	-0.222396853	-0.035870073	0.257410092
EIF2S3	0.153855596	-0.394295409	0.067773894	0.071669709	0.211489884	0.474196477	0.349521611	0.507762714	0.358178325	0.113661344
ABCB10	-0.003669507	0.030313695	0.031032309	-0.033933554	-0.119598604	-0.106317731	-0.031259089	-0.220655543	0.089441857	0.295245518
UFD1L	0.010563814	-0.060865492	0.059173487	0.198375913	0.258667169	0.299344816	0.20201336	0.173563547	0.119466088	-0.140097647
FLI1	0.053983636	-0.216030763	-0.177296531	0.003340382	0.100576184	-0.030001937	-0.210159891	0.043801484	-0.181205196	-0.216179661
LOC149950	-0.020192121	0.081397746	0.082854237	-0.006539805	-5.16E-05	-0.011694387	0.053070285	0.014367536	0.081935916	0.122844395
DCC	0.070135384	-0.054078156	-0.044776337	-0.119282513	-0.098302576	0.030001588	0.189550185	0.04090863	0.080925847	-0.0120039
BCL11B	0.218764504	-0.079965539	0.306626559	0.214530001	0.057515481	0.061637493	0.136490128	-0.012032752	0.23657273	0.345926587
MOSC2	-0.320378463	0.043515977	-0.141148761	0.028749038	0.082328061	-0.003154266	-0.064802676	-0.076260867	-0.027714101	0.007539226
ITGA2	0.176332477	-0.12149242	-0.239763593	-0.213323415	-0.047070148	-0.151500628	-0.232495114	0.032293562	-0.334253159	-0.353942924
CSE1L	0.100516447	0.017072781	0.458118646	0.279064759	0.247502257	0.242813161	0.216861878	0.094003856	0.337752029	0.263149751
OR13C2	0.108517333	-0.302831663	-0.166351378	-0.167435913	-0.178225622	-0.161794387	-0.074155518	-0.068394834	-0.084402122	0.032936109
C6orf218	0.015157213	-0.02256729	-0.307754787	-0.141396125	-0.135802927	-0.328711883	-0.299935465	-0.173483069	-0.324729678	-0.165067547
CLPTM1	-0.042974543	0.184469519	0.276052369	0.327909395	0.332658481	0.422955524	0.414908728	0.351997954	0.371743558	0.101999067
SLC25A24	-0.063315305	0.030814161	0.20459704	-0.171821463	-0.265315967	-0.210286626	0.032039784	-0.204441983	0.024820127	0.249125214
CFHR4	-0.032296188	0.118874877	0.048223006	0.099571553	0.134885223	-0.030467164	-0.141110248	-0.024855849	-0.082136672	-0.008439676
CA10	-0.089579861	0.318864401	0.049270078	-0.025487539	-0.173534639	-0.218269143	-0.133562032	-0.266178295	-0.042948023	0.20010632
RAB27A	0.049725586	-0.059719931	-0.283284017	-0.211738866	-0.014511938	-0.045938301	-0.142237415	-0.001895451	-0.241921321	-0.293744708
UBE2V1	-0.013763162	0.180370015	0.178458799	0.201656297	0.141452443	0.135838797	0.0511813	0.006684367	0.16156137	0.190729356
IGFBP4	0.198937648	0.019986782	-0.119193014	-0.272806499	-0.402697015	-0.249321223	-0.064356187	-0.246158973	-0.109735357	0.067499395
ANGEL1	-0.066061929	0.326573069	0.171038295	0.088674194	-0.136026042	0.105718891	0.291332737	-0.098240977	0.271068325	0.260736483
DST	0.058570518	-0.079275528	-0.313230674	-0.233365633	-0.137677556	-0.320151008	-0.419159644	-0.113210519	-0.494977104	-0.441014721
RNF149	0.151566463	-0.328276987	-0.337360426	-0.194511633	-0.038170468	-0.223466695	-0.441437564	-0.04173118	-0.42310056	-0.337006227
REP15	0.162067803	0.308281025	0.146526152	-0.16196961	-0.165353896	0.00315819	0.003605668	-0.020153212	-0.052272715	-0.174220872
WDR61	0.054388316	0.100395946	0.069870725	0.037561335	-0.040329229	-0.098479092	-0.076964994	-0.222550125	0.002577595	0.113769907
FOLR4	0.012501699	0.01675529	0.06549141	0.014809497	0.085581772	0.139449716	0.146629816	0.13398956	0.155005212	0.10926975
KIF25	0.021518978	-0.073561502	-0.187735575	-0.263044384	-0.217336229	-0.243805231	-0.380600489	-0.159556646	-0.23148377	0.012460061
LASP1	0.06287797	0.130132527	0.151894464	0.314596063	0.122003402	-0.065494108	0.024015374	-0.124824814	0.153351081	0.34927671
HYAL2	-0.109902739	0.170233161	-0.024337028	0.081571736	0.019329117	0.10550784	0.152126591	-0.057204157	0.113635542	-0.028671765
THEM5	0.023463498	0.034762273	-0.065853348	0.083987195	-0.035319665	-0.166911649	-0.196979139	-0.205746947	-0.118129151	0.010045005
MAP4K1	0.064216681	0.028440663	0.196689293	0.32843022	0.186494482	0.257851541	0.233810141	0.164992164	0.279847046	0.13611412
ACBD3	0.093184541	-0.200761096	-0.212561065	-0.091246113	0.051739517	-0.089946702	-0.167769212	-0.079327929	-0.155297669	-0.083087448
GAB2	0.142566786	-0.245172252	-0.268312	-0.145365102	0.02404337	-0.05366856	-0.268727026	0.08595161	-0.368468551	-0.493620754
AKTIP	0.068283991	-0.067417571	0.405828029	0.56780826	0.42903175	0.371995079	0.374930095	0.177210246	0.617840111	0.629741539
ERCC8	-0.047195042	-0.142505773	-0.414854686	-0.218988155	-0.157041651	-0.23998186	-0.235478317	-0.119095485	-0.334446193	-0.313114908
SILV	0.039038501	0.293733367	0.142489917	-0.197863164	-0.286094267	-0.264298275	-0.18812156	-0.275656167	-0.156401258	0.044892688
BCL7A	0.024183856	0.093209057	-0.00822014	-0.228685009	-0.147791298	-0.081328952	-0.027511301	-0.005038122	-0.077207477	-0.073074189
HS3ST4	-0.03624856	-0.013352967	0.029155786	0.099084725	0.000508604	-0.02808525	0.098879177	-0.170999548	0.144596812	0.234187171
WASL	0.022253863	-0.106020918	-0.067045277	-0.181135954	-0.154119455	-0.257613468	-0.289541103	-0.283553609	-0.226562869	-0.031219498
TRAPPC6B	0.13731931	-0.404091107	0.108648438	0.146003564	0.217079616	0.172709379	0.014377014	0.220315982	0.186015693	0.212129902
TNFRSF10D	0.005662788	0.08456167	-0.554157247	-0.493366164	-0.400108074	-0.398873352	-0.384884547	-0.284580267	-0.608876781	-0.553467218
NUP214	-0.067027676	0.009969304	-0.201836877	-0.049502545	-0.103941727	-0.270932449	-0.322104476	-0.226046606	-0.312738486	-0.177486293
TMUB1	-0.269415868	0.272652811	0.174008529	0.137703944	-0.022644542	-0.246380423	-0.18470262	-0.286704613	-0.097545258	0.167634864
REEP2	-0.135649821	-0.14372033	0.004314249	-0.170838573	-0.068512397	-0.159742832	-0.228410229	-0.069613294	-0.084593054	0.182844035
JMJD6	0.054892029	0.344368651	-0.115114416	-0.025294583	-0.149757542	-0.135905771	-0.008288669	-0.192438488	-0.146776629	-0.16554004
CD8B	0.014146539	-0.224826672	-0.186846644	-0.059685947	-0.03033996	-0.123724112	-0.136648519	-0.00042527	-0.07259455	0.101964443
ARHGEF4	-0.075992501	0.085677048	0.201700308	-0.042465134	-0.073394413	-0.02239723	-0.033064909	0.016277864	0.072135448	0.237368083
HEATR3	-0.153350787	0.064536311	-0.128320535	-0.07388726	-0.121666874	-0.244095291	-0.292195214	-0.236987352	-0.207251799	-0.007088141
OPALIN	0.177129288	-0.066384617	-0.003340163	-0.098598404	-0.051437363	-0.068600097	0.000342352	0.01472553	-0.09464434	-0.110903554
FMR1	0.091335473	-0.156677044	-0.089452427	-0.149710302	-0.113611013	-0.146649392	-0.227271876	-0.115869819	-0.172412911	-0.020147356
MB	-0.046644301	0.052926414	0.457247897	0.341176657	0.29526231	0.248697362	0.132847653	0.181615375	0.358163559	0.398898699
YTHDC1	0.108904604	0.015336782	-0.088455244	-0.040793652	0.12375723	0.245523797	0.19755	0.299299691	0.079340608	-0.191947597
FKBP9	0.107253308	-0.015790961	0.212783675	0.113032304	0.097588742	0.375322303	0.411757652	0.354578967	0.365787561	0.129896811
OR8A1	0.002051433	-0.098962494	-0.048846869	-0.076817593	-0.099997114	0.077789018	0.28243471	0.039410728	0.167826959	0.100136404
MORF4L2	-0.008224847	0.105064851	0.208210525	0.3397001	0.398448102	0.496303718	0.514653545	0.349308883	0.49540382	0.227078896
NBR2	-0.114482219	0.059135713	0.038214197	0.099758077	0.053545179	0.005776479	0.00584269	-0.01915791	0.143878187	0.295560197
CECR1	0.013835579	-0.024953129	0.068314445	-0.000763104	0.075234925	0.105487998	0.137259143	0.121171168	0.14328318	0.100398269
IL22RA1	0.17811842	-0.204392665	0.200547556	0.239495736	0.22390558	0.130374035	-0.035099431	0.13733989	0.139299881	0.179619928
TP53I13	-0.118902418	0.069162059	-0.18978426	-0.147833026	-0.215124065	-0.288840765	-0.351093181	-0.277831508	-0.31178739	-0.11165037
HIST2H3C	-0.248672641	0.121166841	0.195159086	0.094484215	0.03400469	0.135901235	0.105916571	-0.029056827	0.187950263	0.127390961
KLK13	0.032859378	0.027139061	0.095722837	-0.08206683	-0.011819421	0.059626971	0.096530988	0.096390974	0.071814445	0.062785872
DCTN5	-0.048889335	0.316500614	0.082559997	0.095350889	-0.073822938	-0.059391149	0.110276305	-0.243674598	0.05693211	0.086979438
VDR	-0.030615027	0.060725317	0.153019306	-0.091266875	-0.062724378	-0.080823209	0.080785839	-0.030154219	-0.009155927	0.002600014
GSDMB	-0.124742386	0.23241592	-0.341391165	-0.287415261	-0.446488996	-0.421790016	-0.194871889	-0.359895244	-0.330421867	-0.169985484
C14orf106	0.167925173	-0.470175546	0.058078833	0.133191806	0.188594538	0.093352727	-0.076537563	0.186788065	0.075370543	0.115335425
ANKRD19	0.061147087	-0.302810239	-0.063365921	-0.004259168	0.112882922	0.062005436	-0.176116685	0.188152393	-0.111110269	-0.163847001
PHACTR3	-0.037322426	0.11958113	-0.217140113	-0.099113828	-0.054173077	-0.090044499	-0.042342679	-0.023995541	-0.17187845	-0.266968529
IL17RC	0.030421046	0.034787134	0.001724844	0.281112017	0.151779162	0.012467821	-0.029585164	-0.082966295	0.122194761	0.263561454
HMGA2	-0.090835936	-0.063362243	-0.15810158	-0.177292202	-0.281000697	-0.222670692	-0.143415581	-0.213180315	-0.119078801	0.076938849
AMFR	0.244312711	-0.021201196	0.406426916	0.394433172	0.341304143	0.495003314	0.493089091	0.407895939	0.54841941	0.332362501
CTSZ	0.039804334	0.130192411	0.521427504	0.640635969	0.464479662	0.470571266	0.481808948	0.249129742	0.631674033	0.500841373
COX11	0.078724319	-0.142515646	0.142461734	0.142321227	0.075953638	0.287106134	0.260795534	0.241076021	0.36401441	0.27398669
CDKN3	0.042386128	-0.010834431	0.499147398	0.610540813	0.587173786	0.64248116	0.50936278	0.455236673	0.607164116	0.317685395
SRRD	0.174964768	0.118139795	0.154680536	0.123749207	0.099147265	0.074293247	-0.056316045	-0.011627533	0.059691081	0.01923601
ALG10B	-0.122950863	-0.19912167	0.155590469	0.04717115	0.054584575	0.098847808	0.075538704	0.099154944	0.112318426	0.101015688
ZPBP2	-0.054865545	-0.130859026	-0.175818453	-0.217268727	-0.124745433	-0.133018145	-0.106025839	-0.007742696	-0.201727885	-0.209083982
FOXN1	-0.009506398	0.04773203	-0.149273104	-0.267788135	-0.301403887	-0.251309628	-0.235807098	-0.160200018	-0.173000592	-0.05335865
COQ10A	-0.208824906	0.124500933	0.201379078	0.21281022	0.076591194	-0.020088923	-0.043224174	-0.136857292	0.158661708	0.307598819
ATP5H	0.047556724	0.025498577	0.09541073	0.333545813	0.22826007	0.200823411	0.246726828	0.069892765	0.317557896	0.251667006
TRIM56	0.102676015	-0.05794717	0.218942099	0.141017056	0.145516385	0.39819917	0.501009114	0.351189285	0.361229708	0.018135411
MAGEC1	-0.05035827	-0.389244319	0.02532196	0.017391731	0.09854796	0.202602046	0.275731892	0.195400137	0.171642578	0.010350792
STARD13	-0.142256835	0.317997625	-0.281382173	-0.109992727	-0.314819601	-0.271436137	-0.024859194	-0.332629701	-0.181175329	-0.093630811
CALM3	0.023394028	-0.222674916	0.496693862	0.407781889	0.355359363	0.466149404	0.424278491	0.431110919	0.540806728	0.411583332
WNT4	0.328711304	-0.388419525	0.115250216	0.1556877	0.262681094	0.302564978	0.110116622	0.396941704	0.21692111	0.139225956
RING1	-0.315918806	0.267690024	-0.126261022	-0.243958353	-0.173444511	-0.202110685	-0.153614458	-0.128418104	-0.316504726	-0.351482395
PSMB6	-0.266672499	0.2079093	0.044870732	0.147219049	-0.063062945	-0.125052745	0.007595174	-0.317491765	0.082742525	0.279114505
CAMK2A	0.043393792	0.024576063	0.140436496	-0.028625939	0.032924972	0.041253841	0.022896865	0.093924153	0.035463388	0.036058093
FAM134C	0.04771062	-0.069208981	0.049347466	0.148129739	0.101558135	0.092390732	0.001262798	0.023992747	0.041671746	-0.026638979
STK3	0.213682803	-0.477433265	-0.171980448	-0.368693686	-0.251602956	-0.290420517	-0.361300595	-0.14259144	-0.292490529	-0.112998353
ROBO1	0.145969243	0.118189612	0.211348827	-0.101284773	-0.188514391	-0.227999285	-0.095322723	-0.147204106	-0.06439313	0.141813626
UQCRQ	0.011570336	0.027037754	0.13928028	0.248964819	0.064506383	-0.01345299	-0.03124422	-0.085955839	0.199864406	0.432216971
SP2	0.050145953	-0.06728481	-0.144746239	-0.016683467	0.157569709	0.236657878	0.124555927	0.276991088	-0.035444533	-0.342108085
CCR10	0.23045949	-0.123337768	-0.039205375	0.317735167	0.245523135	0.160113917	0.056707708	0.169757114	0.119721184	-0.007043997
CRK	0.04813601	0.296365848	0.047465106	0.161326946	0.180839482	0.248748973	0.321356045	0.139417488	0.231157288	0.024707715
SOBP	-0.145916082	-0.030007275	0.042318803	0.081270176	0.102630154	0.150088025	0.129607306	0.19006296	0.091721824	-0.044761552
DENND2A	-0.182094263	0.249682729	-0.312910115	-0.338322424	-0.399887354	-0.508129059	-0.490334898	-0.463288897	-0.534469731	-0.266255323
SKIV2L	-0.090621484	0.319709348	-0.339619744	-0.220354325	-0.248516156	-0.271294173	-0.13903852	-0.242214293	-0.31079029	-0.298164061
COL25A1	-0.023108426	0.027595263	-0.059083043	-0.080707068	-0.171371148	-0.315050514	-0.290369009	-0.211273243	-0.235581934	0.021524974
PITX3	-0.040385787	-0.025456415	0.055169551	0.052311474	0.127679938	0.217837651	0.222005677	0.194861678	0.216790295	0.100557478
VSIG2	0.222788436	0.016290789	0.072376358	0.164868956	0.164874497	0.223362599	0.048108636	0.194164172	0.196118039	0.105975126
GCNT1	-0.037954827	0.0507832	0.266498761	0.177737116	0.022947214	0.117926729	0.304826436	0.010468733	0.312291516	0.252441785
DUSP14	0.073623096	-0.152173635	-0.05360807	0.087546107	0.147690885	-0.016024652	-0.264463322	0.01486302	-0.159397072	-0.140862368
ZNF75A	0.072504456	-0.112374472	-0.111098455	0.043439652	0.028135863	-0.102395321	-0.262673645	-0.073070611	-0.172069853	-0.095431249
SLC25A19	0.00019101	0.10891355	-0.15764016	-0.022127843	-0.12464749	-0.128000691	-0.059853955	-0.241967642	-0.065911407	0.054545438
TRERF1	0.017530982	-0.124421739	0.020531832	-0.098056547	0.051518963	0.038224462	-0.024055265	0.094615054	-0.02587576	-0.102293021
IFT88	-0.052474357	0.188729001	-0.456415982	-0.340035267	-0.322727139	-0.478757419	-0.485116867	-0.370967171	-0.608329555	-0.465229262
IRF8	-0.08983704	0.02733462	-0.444280618	-0.302164734	-0.172513449	-0.282022395	-0.326448141	-0.238342451	-0.507129539	-0.534752914
HSPB9	-0.19152293	0.216924541	0.006912014	0.042457191	-0.080537695	-0.15616234	-0.187429425	-0.290576673	-0.087134429	0.030752098
PI4KB	-0.09981845	0.361152287	-0.174051321	-0.221222423	-0.37955933	-0.32077059	-0.12802962	-0.37748443	-0.259102889	-0.122082236
SNORD30	-0.12134174	0.074315218	-0.450032658	-0.445110288	-0.494510422	-0.592842069	-0.454908821	-0.515657537	-0.541506432	-0.246755643
NARG2	-0.06485435	-0.019744754	-0.107034523	-0.171460811	-0.06317988	-0.035083475	0.046015889	0.069586624	-0.05717351	-0.102274988
PREPL	0.17443968	-0.469298687	0.060042836	0.0817848	0.172326472	-0.013089031	-0.244939991	0.078915782	-0.049617183	0.055147771
RABL2A	0.060647655	-0.111874272	0.079463519	0.044634738	0.037780985	0.029469879	-0.081047271	0.044924213	0.046977131	0.101476459
KIF17	0.074505612	-0.058351507	0.066585488	-0.025240241	0.04029232	0.031920546	0.062079082	0.064788819	0.108546056	0.140658303
VPS52	0.157354238	0.148997665	0.318281855	0.34709674	0.344722658	0.387301192	0.276883657	0.356345959	0.341900611	0.157378597
[truncated: 18,821 more rows]
